# Supplementary material for: Tau Mutations Serve as a Novel Risk Factor for Cancer
Source: Oxford University Press journal article supplement (doi:10.1158/0008-5472.can-17-3175), 2018-05-24
Supplement: 00085472can173175-sup-190906_3_supp_4681881_p6ymqk.xlsx [file 00085472can173175-sup-190906_3_supp_4681881_p6ymqk.xlsx]

## Sheet: Table S3
p-value	T	Q	Q&T	Q&T/Q	Q&T/T	term ID	t type	t group	t name	t depth	Semantic class	Block
0.0204	22	3127	13	0.004	0.591	GO:1904886	BP	2	beta-catenin destruction complex disassembly	9	adhesion	ADHESION
6.95E-18	1335	3127	351	0.112	0.263	GO:0022610	BP	2	biological adhesion	2	adhesion	ADHESION
1.67E-17	1327	3127	348	0.111	0.262	GO:0007155	BP	2	cell adhesion	3	adhesion	ADHESION
8.52E-22	630	3127	208	0.067	0.33	GO:0098602	BP	2	single organism cell adhesion	3	adhesion	ADHESION
1.38E-17	252	3127	104	0.033	0.413	GO:0034330	BP	2	cell junction organization	4	adhesion	ADHESION
1.82E-18	194	3127	89	0.028	0.459	GO:0034329	BP	2	cell junction assembly	5	adhesion	ADHESION
0.0000112	55	3127	28	0.009	0.509	GO:0043297	BP	2	apical junction assembly	7	adhesion	ADHESION
0.000006	70	3127	33	0.011	0.471	GO:0048041	BP	2	focal adhesion assembly	8	adhesion	ADHESION
4.33E-08	73	3127	37	0.012	0.507	GO:1901888	BP	2	regulation of cell junction assembly	5	adhesion	ADHESION
6.57E-26	628	3127	217	0.069	0.346	GO:0030155	BP	2	regulation of cell adhesion	3	adhesion	ADHESION
0.012	50	3127	22	0.007	0.44	GO:0051893	BP	2	regulation of focal adhesion assembly	6	adhesion	ADHESION
1.06E-15	370	3127	131	0.042	0.354	GO:0045785	BP	2	positive regulation of cell adhesion	3	adhesion	ADHESION
0.00000587	220	3127	72	0.023	0.327	GO:0007162	BP	2	negative regulation of cell adhesion	4	adhesion	ADHESION
0.0368	29	3127	15	0.005	0.517	GO:1901890	BP	2	positive regulation of cell junction assembly	4	adhesion	ADHESION
0.000000358	119	3127	49	0.016	0.412	GO:0034332	BP	2	adherens junction organization	6	adhesion - adherens junction	ADHESION
0.000000279	80	3127	38	0.012	0.475	GO:0034333	BP	2	adherens junction assembly	6	adhesion - adherens junction	ADHESION
0.000006	70	3127	33	0.011	0.471	GO:0007045	BP	2	cell-substrate adherens junction assembly	7	adhesion - adherens junction	ADHESION
0.00651	52	3127	23	0.007	0.442	GO:1903391	BP	2	regulation of adherens junction organization	5	adhesion - adherens junction	ADHESION
4.15E-11	769	3127	209	0.067	0.272	GO:0098609	BP	2	cell-cell adhesion	4	adhesion - cell-cell	ADHESION
3.2E-19	576	3127	189	0.06	0.328	GO:0016337	BP	2	single organismal cell-cell adhesion	4	adhesion - cell-cell	ADHESION
2.65E-15	223	3127	92	0.029	0.413	GO:0045216	BP	2	cell-cell junction organization	5	adhesion - cell-cell	ADHESION
2.08E-08	91	3127	43	0.014	0.473	GO:0007043	BP	2	cell-cell junction assembly	6	adhesion - cell-cell	ADHESION
8.06E-16	377	3127	133	0.043	0.353	GO:0022407	BP	2	regulation of cell-cell adhesion	4	adhesion - cell-cell	ADHESION
4.03E-09	235	3127	83	0.027	0.353	GO:0022409	BP	2	positive regulation of cell-cell adhesion	4	adhesion - cell-cell	ADHESION
0.00075	133	3127	46	0.015	0.346	GO:0022408	BP	2	negative regulation of cell-cell adhesion	5	adhesion - cell-cell	ADHESION
0.00199	74	3127	30	0.01	0.405	GO:0034109	BP	2	homotypic cell-cell adhesion	5	adhesion - cell-cell - homotypic	ADHESION
0.0000074	196	3127	66	0.021	0.337	GO:0007160	BP	2	cell-matrix adhesion	5	adhesion - cell-matrix	ADHESION
0.00000552	94	3127	40	0.013	0.426	GO:0001952	BP	2	regulation of cell-matrix adhesion	5	adhesion - cell-matrix	ADHESION
2.3E-10	305	3127	103	0.033	0.338	GO:0031589	BP	2	cell-substrate adhesion	4	adhesion - cell-substrate	ADHESION
0.000689	82	3127	33	0.011	0.402	GO:0034446	BP	2	substrate adhesion-dependent cell spreading	7	adhesion - cell-substrate	ADHESION
0.0000224	87	3127	37	0.012	0.425	GO:0007044	BP	2	cell-substrate junction assembly	6	adhesion - cell-substrate	ADHESION
0.012	50	3127	22	0.007	0.44	GO:0090109	BP	2	regulation of cell-substrate junction assembly	6	adhesion - cell-substrate	ADHESION
0.000000205	178	3127	65	0.021	0.365	GO:0010810	BP	2	regulation of cell-substrate adhesion	4	adhesion - cell-substrate	ADHESION
0.00221	105	3127	38	0.012	0.362	GO:0010811	BP	2	positive regulation of cell-substrate adhesion	4	adhesion - cell-substrate	ADHESION
0.00209	46	3127	22	0.007	0.478	GO:0070830	BP	2	bicellular tight junction assembly	7	adhesion - cell-cell	ADHESION
0.0497	43	3127	19	0.006	0.442	GO:0001954	BP	2	positive regulation of cell-matrix adhesion	5	adhesion cell matrix	ADHESION
0.0493	10	3127	8	0.003	0.8	GO:0007084	BP	2	mitotic nuclear envelope reassembly	1	cell cycle	CELL CYCLE
0.0269	45	3127	20	0.006	0.444	GO:0045840	BP	2	positive regulation of mitotic nuclear division	1	cell cycle	CELL CYCLE
5.02E-35	570	3127	221	0.071	0.388	GO:0051301	BP	2	cell division	4	cell cycle	CELL CYCLE
8.17E-101	1678	3127	625	0.2	0.372	GO:0007049	BP	2	cell cycle	4	cell cycle	CELL CYCLE
7.7E-84	975	3127	414	0.132	0.425	GO:0000278	BP	2	mitotic cell cycle	5	cell cycle	CELL CYCLE
3.8E-77	1228	3127	469	0.15	0.382	GO:0022402	BP	2	cell cycle process	3	cell cycle	CELL CYCLE
3.04E-74	774	3127	343	0.11	0.443	GO:1903047	BP	2	mitotic cell cycle process	4	cell cycle	CELL CYCLE
0.00732	126	3127	42	0.013	0.333	GO:0007062	BP	2	sister chromatid cohesion	4	cell cycle	CELL CYCLE
1.96E-59	988	3127	375	0.12	0.38	GO:0051726	BP	2	regulation of cell cycle	4	cell cycle	CELL CYCLE
6.1E-38	498	3127	207	0.066	0.416	GO:0007346	BP	2	regulation of mitotic cell cycle	5	cell cycle	CELL CYCLE
4.59E-36	574	3127	224	0.072	0.39	GO:0010564	BP	2	regulation of cell cycle process	5	cell cycle	CELL CYCLE
6.96E-23	331	3127	135	0.043	0.408	GO:0045787	BP	2	positive regulation of cell cycle	4	cell cycle	CELL CYCLE
1.91E-17	242	3127	101	0.032	0.417	GO:0090068	BP	2	positive regulation of cell cycle process	5	cell cycle	CELL CYCLE
1.34E-11	125	3127	58	0.019	0.464	GO:0045931	BP	2	positive regulation of mitotic cell cycle	5	cell cycle	CELL CYCLE
6.3E-29	558	3127	206	0.066	0.369	GO:0045786	BP	2	negative regulation of cell cycle	4	cell cycle	CELL CYCLE
3.48E-18	241	3127	102	0.033	0.423	GO:0007050	BP	2	cell cycle arrest	5	cell cycle	CELL CYCLE
5.88E-09	105	3127	48	0.015	0.457	GO:0071156	BP	2	regulation of cell cycle arrest	6	cell cycle	CELL CYCLE
3.14E-08	82	3127	40	0.013	0.488	GO:0071158	BP	2	positive regulation of cell cycle arrest	6	cell cycle	CELL CYCLE
8.97E-16	268	3127	105	0.034	0.392	GO:0045930	BP	2	negative regulation of mitotic cell cycle	5	cell cycle	CELL CYCLE
1.32E-13	265	3127	100	0.032	0.377	GO:0010948	BP	2	negative regulation of cell cycle process	5	cell cycle	CELL CYCLE
1.85E-15	222	3127	92	0.029	0.414	GO:0000075	BP	2	cell cycle checkpoint	5	cell cycle - checkpoint	CELL CYCLE
9.28E-08	65	3127	34	0.011	0.523	GO:0072395	BP	2	signal transduction involved in cell cycle checkpoint	6	cell cycle - checkpoint	CELL CYCLE
7.13E-12	151	3127	66	0.021	0.437	GO:0007093	BP	2	mitotic cell cycle checkpoint	6	cell cycle - checkpoint	CELL CYCLE
0.000000553	62	3127	32	0.01	0.516	GO:0072413	BP	2	signal transduction involved in mitotic cell cycle checkpoint	7	cell cycle - checkpoint	CELL CYCLE
0.000000149	69	3127	35	0.011	0.507	GO:0044819	BP	2	mitotic G1/S transition checkpoint	9	cell cycle - checkpoint	CELL CYCLE
0.0000127	82	3127	36	0.012	0.439	GO:1904029	BP	2	regulation of cyclin-dependent protein kinase activity	5	cell cycle - enzyme	CELL CYCLE
0.00000558	80	3127	36	0.012	0.45	GO:0000079	BP	2	regulation of cyclin-dependent protein serine/threonine kinase activity	6	cell cycle - enzyme	CELL CYCLE
0.00237	82	3127	32	0.01	0.39	GO:0010972	BP	2	negative regulation of G2/M transition of mitotic cell cycle	8	cell cycle - phase transition	CELL CYCLE
1.6E-53	543	3127	245	0.078	0.451	GO:0044770	BP	2	cell cycle phase transition	4	cell cycle - phase transition	CELL CYCLE
1.74E-38	243	3127	132	0.042	0.543	GO:0044839	BP	2	cell cycle G2/M phase transition	5	cell cycle - phase transition	CELL CYCLE
2.8E-21	251	3127	110	0.035	0.438	GO:0044843	BP	2	cell cycle G1/S phase transition	5	cell cycle - phase transition	CELL CYCLE
3.24E-55	517	3127	240	0.077	0.464	GO:0044772	BP	2	mitotic cell cycle phase transition	5	cell cycle - phase transition	CELL CYCLE
1.11E-37	234	3127	128	0.041	0.547	GO:0000086	BP	2	G2/M transition of mitotic cell cycle	6	cell cycle - phase transition	CELL CYCLE
9.67E-22	238	3127	107	0.034	0.45	GO:0000082	BP	2	G1/S transition of mitotic cell cycle	6	cell cycle - phase transition	CELL CYCLE
5.58E-21	329	3127	131	0.042	0.398	GO:1901987	BP	2	regulation of cell cycle phase transition	6	cell cycle - phase transition	CELL CYCLE
0.000000719	121	3127	49	0.016	0.405	GO:1902749	BP	2	regulation of cell cycle G2/M phase transition	7	cell cycle - phase transition	CELL CYCLE
3.23E-13	147	3127	67	0.021	0.456	GO:1902806	BP	2	regulation of cell cycle G1/S phase transition	7	cell cycle - phase transition	CELL CYCLE
4.66E-23	308	3127	129	0.041	0.419	GO:1901990	BP	2	regulation of mitotic cell cycle phase transition	7	cell cycle - phase transition	CELL CYCLE
0.0000072	113	3127	45	0.014	0.398	GO:0010389	BP	2	regulation of G2/M transition of mitotic cell cycle	8	cell cycle - phase transition	CELL CYCLE
1.37E-13	135	3127	64	0.02	0.474	GO:2000045	BP	2	regulation of G1/S transition of mitotic cell cycle	8	cell cycle - phase transition	CELL CYCLE
0.00129	62	3127	27	0.009	0.435	GO:1901989	BP	2	positive regulation of cell cycle phase transition	6	cell cycle - phase transition	CELL CYCLE
0.0196	31	3127	16	0.005	0.516	GO:1902808	BP	2	positive regulation of cell cycle G1/S phase transition	7	cell cycle - phase transition	CELL CYCLE
0.00126	55	3127	25	0.008	0.455	GO:1901992	BP	2	positive regulation of mitotic cell cycle phase transition	6	cell cycle - phase transition	CELL CYCLE
0.0392	26	3127	14	0.004	0.538	GO:1900087	BP	2	positive regulation of G1/S transition of mitotic cell cycle	7	cell cycle - phase transition	CELL CYCLE
3.13E-12	203	3127	81	0.026	0.399	GO:1901988	BP	2	negative regulation of cell cycle phase transition	6	cell cycle - phase transition	CELL CYCLE
0.000000122	95	3127	43	0.014	0.453	GO:1902807	BP	2	negative regulation of cell cycle G1/S phase transition	7	cell cycle - phase transition	CELL CYCLE
0.00442	84	3127	32	0.01	0.381	GO:1902750	BP	2	negative regulation of cell cycle G2/M phase transition	7	cell cycle - phase transition	CELL CYCLE
1.95E-13	195	3127	81	0.026	0.415	GO:1901991	BP	2	negative regulation of mitotic cell cycle phase transition	7	cell cycle - phase transition	CELL CYCLE
3.28E-08	92	3127	43	0.014	0.467	GO:2000134	BP	2	negative regulation of G1/S transition of mitotic cell cycle	8	cell cycle - phase transition	CELL CYCLE
7.41E-15	237	3127	95	0.03	0.401	GO:0140014	BP	2	mitotic nuclear division	5	cell cycle - segregation/cytokinesis	CELL CYCLE
0.0468	36	3127	17	0.005	0.472	GO:0010824	BP	2	regulation of centrosome duplication	7	cell cycle - segregation/cytokinesis	CELL CYCLE
0.0337	12	3127	9	0.003	0.75	GO:0051988	BP	2	regulation of attachment of spindle microtubules to kinetochore	6	cell cycle - segregation/cytokinesis	CELL CYCLE
7.9E-13	331	3127	115	0.037	0.347	GO:0007059	BP	2	chromosome segregation	4	cell cycle - segregation/cytokinesis	CELL CYCLE
6.12E-12	381	3127	125	0.04	0.328	GO:0000280	BP	2	nuclear division	6	cell cycle - segregation/cytokinesis	CELL CYCLE
9.96E-09	288	3127	95	0.03	0.33	GO:0098813	BP	2	nuclear chromosome segregation	4	cell cycle - segregation/cytokinesis	CELL CYCLE
5.61E-08	217	3127	76	0.024	0.35	GO:0000819	BP	2	sister chromatid segregation	5	cell cycle - segregation/cytokinesis	CELL CYCLE
8.81E-08	137	3127	55	0.018	0.401	GO:0000910	BP	2	cytokinesis	4	cell cycle - segregation/cytokinesis	CELL CYCLE
0.00172	36	3127	19	0.006	0.528	GO:0000281	BP	2	mitotic cytokinesis	5	cell cycle - segregation/cytokinesis	CELL CYCLE
0.000583	132	3127	46	0.015	0.348	GO:0000070	BP	2	mitotic sister chromatid segregation	5	cell cycle - segregation/cytokinesis	CELL CYCLE
0.00503	62	3127	26	0.008	0.419	GO:0051298	BP	2	centrosome duplication	4	cell cycle - segregation/cytokinesis	CELL CYCLE
2.11E-09	163	3127	65	0.021	0.399	GO:0051783	BP	2	regulation of nuclear division	6	cell cycle - segregation/cytokinesis	CELL CYCLE
0.00000462	83	3127	37	0.012	0.446	GO:0051983	BP	2	regulation of chromosome segregation	4	cell cycle - segregation/cytokinesis	CELL CYCLE
0.0358	64	3127	25	0.008	0.391	GO:0032465	BP	2	regulation of cytokinesis	6	cell cycle - segregation/cytokinesis	CELL CYCLE
0.00723	63	3127	26	0.008	0.413	GO:0033045	BP	2	regulation of sister chromatid segregation	6	cell cycle - segregation/cytokinesis	CELL CYCLE
3.78E-10	140	3127	60	0.019	0.429	GO:0007088	BP	2	regulation of mitotic nuclear division	6	cell cycle - segregation/cytokinesis	CELL CYCLE
0.0000774	46	3127	24	0.008	0.522	GO:0061640	BP	2	cytoskeleton-dependent cytokinesis	5	cell cycle-cytoskeleton	CELL CYCLE
7.31E-13	106	3127	54	0.017	0.509	GO:1902850	BP	2	microtubule cytoskeleton organization involved in mitosis	5	cell cycle-cytoskeleton	CELL CYCLE
0.00172	36	3127	19	0.006	0.528	GO:0051653	BP	2	spindle localization	4	cell cycle-cytoskeleton	CELL CYCLE
0.00332	31	3127	17	0.005	0.548	GO:0051293	BP	2	establishment of spindle localization	5	cell cycle-cytoskeleton	CELL CYCLE
1.94E-18	145	3127	74	0.024	0.51	GO:0007051	BP	2	spindle organization	4	cell cycle-cytoskeleton	CELL CYCLE
3.34E-11	88	3127	46	0.015	0.523	GO:0007052	BP	2	mitotic spindle organization	5	cell cycle-cytoskeleton	CELL CYCLE
0.00000569	87	3127	38	0.012	0.437	GO:0051225	BP	2	spindle assembly	5	cell cycle-cytoskeleton	CELL CYCLE
0.00651	52	3127	23	0.007	0.442	GO:0090307	BP	2	mitotic spindle assembly	6	cell cycle-cytoskeleton	CELL CYCLE
2.81E-10	115	3127	53	0.017	0.461	GO:0007098	BP	2	centrosome cycle	4	cell cycle-cytoskeleton	CELL CYCLE
0.000604	50	3127	24	0.008	0.48	GO:0046605	BP	2	regulation of centrosome cycle	6	cell cycle-cytoskeleton	CELL CYCLE
2.13E-103	2035	3127	716	0.229	0.352	GO:0008219	BP	2	cell death	4	cell death	CELL DEATH
8.62E-33	306	3127	144	0.046	0.471	GO:0070997	BP	2	neuron death	5	cell death	CELL DEATH
1.56E-97	1927	3127	679	0.217	0.352	GO:0012501	BP	2	programmed cell death	5	cell death	CELL DEATH
0.00177	30	3127	17	0.005	0.567	GO:0030262	BP	2	apoptotic nuclear changes	6	cell death	CELL DEATH
4.13E-84	1492	3127	548	0.175	0.367	GO:0010941	BP	2	regulation of cell death	4	cell death	CELL DEATH
3.56E-78	1396	3127	513	0.164	0.367	GO:0043067	BP	2	regulation of programmed cell death	5	cell death	CELL DEATH
2.55E-49	606	3127	256	0.082	0.422	GO:0010942	BP	2	positive regulation of cell death	4	cell death	CELL DEATH
4.47E-16	69	3127	45	0.014	0.652	GO:1901216	BP	2	positive regulation of neuron death	5	cell death	CELL DEATH
4.85E-44	573	3127	238	0.076	0.415	GO:0043068	BP	2	positive regulation of programmed cell death	5	cell death	CELL DEATH
5.14E-51	890	3127	334	0.107	0.375	GO:0060548	BP	2	negative regulation of cell death	4	cell death	CELL DEATH
9.94E-49	821	3127	312	0.1	0.38	GO:0043069	BP	2	negative regulation of programmed cell death	5	cell death	CELL DEATH
1.81E-13	184	3127	78	0.025	0.424	GO:1901215	BP	2	negative regulation of neuron death	5	cell death	CELL DEATH
2.06E-28	271	3127	127	0.041	0.469	GO:1901214	BP	2	regulation of neuron death	5	cell death	CELL DEATH
0.0000171	32	3127	20	0.006	0.625	GO:0043276	BP	2	anoikis	7	cell death - anoikis	CELL DEATH
0.00544	23	3127	14	0.004	0.609	GO:2000209	BP	2	regulation of anoikis	7	cell death - anoikis	CELL DEATH
4.65E-103	1804	3127	660	0.211	0.366	GO:0006915	BP	2	apoptotic process	6	cell death - apoptosis	CELL DEATH
0.000047	89	3127	37	0.012	0.416	GO:1904019	BP	2	epithelial cell apoptotic process	7	cell death - apoptosis	CELL DEATH
0.0213	14	3127	10	0.003	0.714	GO:0097284	BP	2	hepatocyte apoptotic process	8	cell death - apoptosis	CELL DEATH
0.00126	55	3127	25	0.008	0.455	GO:0010657	BP	2	muscle cell apoptotic process	7	cell death - apoptosis	CELL DEATH
0.00475	15	3127	11	0.004	0.733	GO:0034349	BP	2	glial cell apoptotic process	7	cell death - apoptosis	CELL DEATH
3.54E-20	219	3127	99	0.032	0.452	GO:0051402	BP	2	neuron apoptotic process	7	cell death - apoptosis	CELL DEATH
6.33E-10	84	3127	43	0.014	0.512	GO:0097194	BP	2	execution phase of apoptosis	4	cell death - apoptosis	CELL DEATH
0.006	32	3127	17	0.005	0.531	GO:0006921	BP	2	cellular component disassembly involved in execution phase of apoptosis	5	cell death - apoptosis	CELL DEATH
0.0044	20	3127	13	0.004	0.65	GO:0006309	BP	2	apoptotic DNA fragmentation	7	cell death - apoptosis	CELL DEATH
8.23E-76	1382	3127	505	0.161	0.365	GO:0042981	BP	2	regulation of apoptotic process	6	cell death - apoptosis	CELL DEATH
0.00279	50	3127	23	0.007	0.46	GO:0010660	BP	2	regulation of muscle cell apoptotic process	7	cell death - apoptosis	CELL DEATH
0.0111	24	3127	14	0.004	0.583	GO:1900117	BP	2	regulation of execution phase of apoptosis	7	cell death - apoptosis	CELL DEATH
1.43E-16	194	3127	86	0.028	0.443	GO:0043523	BP	2	regulation of neuron apoptotic process	7	cell death - apoptosis	CELL DEATH
4.3E-42	567	3127	233	0.075	0.411	GO:0043065	BP	2	positive regulation of apoptotic process	6	cell death - apoptosis	CELL DEATH
0.00000112	48	3127	27	0.009	0.562	GO:0043525	BP	2	positive regulation of neuron apoptotic process	7	cell death - apoptosis	CELL DEATH
8.2E-47	808	3127	305	0.098	0.377	GO:0043066	BP	2	negative regulation of apoptotic process	6	cell death - apoptosis	CELL DEATH
6.8E-09	137	3127	57	0.018	0.416	GO:0043524	BP	2	negative regulation of neuron apoptotic process	6	cell death - apoptosis	CELL DEATH
7.02E-27	216	3127	108	0.035	0.5	GO:0097191	BP	2	extrinsic apoptotic signaling pathway	6	cell death - apoptosis - extrinsic	CELL DEATH
4.77E-13	81	3127	46	0.015	0.568	GO:0008625	BP	2	extrinsic apoptotic signaling pathway via death domain receptors	7	cell death - apoptosis - extrinsic	CELL DEATH
2.54E-09	71	3127	38	0.012	0.535	GO:0097192	BP	2	extrinsic apoptotic signaling pathway in absence of ligand	7	cell death - apoptosis - extrinsic	CELL DEATH
1.61E-16	157	3127	75	0.024	0.478	GO:2001236	BP	2	regulation of extrinsic apoptotic signaling pathway	7	cell death - apoptosis - extrinsic	CELL DEATH
0.00000109	57	3127	30	0.01	0.526	GO:1902041	BP	2	regulation of extrinsic apoptotic signaling pathway via death domain receptors	8	cell death - apoptosis - extrinsic	CELL DEATH
0.0000128	49	3127	26	0.008	0.531	GO:2001239	BP	2	regulation of extrinsic apoptotic signaling pathway in absence of ligand	8	cell death - apoptosis - extrinsic	CELL DEATH
0.00000208	52	3127	28	0.009	0.538	GO:2001238	BP	2	positive regulation of extrinsic apoptotic signaling pathway	6	cell death - apoptosis - extrinsic	CELL DEATH
0.0213	14	3127	10	0.003	0.714	GO:2001241	BP	2	positive regulation of extrinsic apoptotic signaling pathway in absence of ligand	7	cell death - apoptosis - extrinsic	CELL DEATH
1.78E-10	104	3127	50	0.016	0.481	GO:2001237	BP	2	negative regulation of extrinsic apoptotic signaling pathway	6	cell death - apoptosis - extrinsic	CELL DEATH
0.0000414	36	3127	21	0.007	0.583	GO:1902042	BP	2	negative regulation of extrinsic apoptotic signaling pathway via death domain receptors	7	cell death - apoptosis - extrinsic	CELL DEATH
5.32E-34	274	3127	136	0.043	0.496	GO:0097193	BP	2	intrinsic apoptotic signaling pathway	6	cell death - apoptosis - intrinsic	CELL DEATH
0.000113	77	3127	33	0.011	0.429	GO:0072332	BP	2	intrinsic apoptotic signaling pathway by p53 class mediator	7	cell death - apoptosis - intrinsic	CELL DEATH
3.3E-19	148	3127	76	0.024	0.514	GO:2001242	BP	2	regulation of intrinsic apoptotic signaling pathway	7	cell death - apoptosis - intrinsic	CELL DEATH
0.000000182	54	3127	30	0.01	0.556	GO:2001244	BP	2	positive regulation of intrinsic apoptotic signaling pathway	6	cell death - apoptosis - intrinsic	CELL DEATH
3.34E-11	88	3127	46	0.015	0.523	GO:2001243	BP	2	negative regulation of intrinsic apoptotic signaling pathway	6	cell death - apoptosis - intrinsic	CELL DEATH
1.01E-17	198	3127	89	0.028	0.449	GO:0043281	BP	2	regulation of cysteine-type endopeptidase activity involved in apoptotic process	7	cell death - enzymes	CELL DEATH
0.00251	22	3127	14	0.004	0.636	GO:2001267	BP	2	regulation of cysteine-type endopeptidase activity involved in apoptotic signaling pathway	7	cell death - enzymes	CELL DEATH
4.91E-13	118	3127	58	0.019	0.492	GO:0043280	BP	2	positive regulation of cysteine-type endopeptidase activity involved in apoptotic process	10	cell death - enzymes	CELL DEATH
1.03E-08	83	3127	41	0.013	0.494	GO:0006919	BP	2	activation of cysteine-type endopeptidase activity involved in apoptotic process	11	cell death - enzymes	CELL DEATH
0.000222	17	3127	13	0.004	0.765	GO:2001269	BP	2	positive regulation of cysteine-type endopeptidase activity involved in apoptotic signaling pathway	11	cell death - enzymes	CELL DEATH
0.000376	13	3127	11	0.004	0.846	GO:0097296	BP	2	activation of cysteine-type endopeptidase activity involved in apoptotic signaling pathway	12	cell death - enzymes	CELL DEATH
0.000689	82	3127	33	0.011	0.402	GO:0043154	BP	2	negative regulation of cysteine-type endopeptidase activity involved in apoptotic process	7	cell death - enzymes	CELL DEATH
0.00000325	59	3127	30	0.01	0.508	GO:0070059	BP	2	intrinsic apoptotic signaling pathway in response to endoplasmic reticulum stress	7	cell death - ER stress	CELL DEATH
0.000000015	56	3127	32	0.01	0.571	GO:1902686	BP	2	mitochondrial outer membrane permeabilization involved in programmed cell death	9	cell death - mitochondria	CELL DEATH
2.42E-12	118	3127	57	0.018	0.483	GO:0008637	BP	2	apoptotic mitochondrial changes	6	cell death - mitochondria	CELL DEATH
8.58E-09	61	3127	34	0.011	0.557	GO:1902108	BP	2	regulation of mitochondrial membrane permeability involved in apoptotic process	7	cell death - mitochondria	CELL DEATH
0.000000015	56	3127	32	0.01	0.571	GO:1902110	BP	2	positive regulation of mitochondrial membrane permeability involved in apoptotic process	8	cell death - mitochondria	CELL DEATH
4.28E-08	33	3127	23	0.007	0.697	GO:0001844	BP	2	protein insertion into mitochondrial membrane involved in apoptotic signaling pathway	7	cell death - mitochondria	CELL DEATH
8.02E-08	47	3127	28	0.009	0.596	GO:1901028	BP	2	regulation of mitochondrial outer membrane permeabilization involved in apoptotic signaling pathway	7	cell death - mitochondria	CELL DEATH
6.77E-08	31	3127	22	0.007	0.71	GO:1900739	BP	2	regulation of protein insertion into mitochondrial membrane involved in apoptotic signaling pathway	8	cell death - mitochondria	CELL DEATH
9.41E-08	39	3127	25	0.008	0.641	GO:1901030	BP	2	positive regulation of mitochondrial outer membrane permeabilization involved in apoptotic signaling pathway	5	cell death - mitochondria	CELL DEATH
6.77E-08	31	3127	22	0.007	0.71	GO:1900740	BP	2	positive regulation of protein insertion into mitochondrial membrane involved in apoptotic signaling pathway	5	cell death - mitochondria	CELL DEATH
0.000372	49	3127	24	0.008	0.49	GO:0070265	BP	2	necrotic cell death	5	cell death - necrosis	CELL DEATH
0.00000684	42	3127	24	0.008	0.571	GO:0097300	BP	2	programmed necrotic cell death	6	cell death - necrosis	CELL DEATH
0.000519	37	3127	20	0.006	0.541	GO:0070266	BP	2	necroptotic process	7	cell death - necrosis	CELL DEATH
0.0373	20	3127	12	0.004	0.6	GO:0060544	BP	2	regulation of necroptotic process	6	cell death - necrosis	CELL DEATH
0.0493	10	3127	8	0.003	0.8	GO:1901298	BP	2	regulation of hydrogen peroxide-mediated programmed cell death	8	cell death - oxidative stress	CELL DEATH
1.98E-13	74	3127	44	0.014	0.595	GO:0036473	BP	2	cell death in response to oxidative stress	6	cell death - oxidative stress	CELL DEATH
0.0337	12	3127	9	0.003	0.75	GO:0097468	BP	2	programmed cell death in response to reactive oxygen species	7	cell death - oxidative stress	CELL DEATH
0.000362	25	3127	16	0.005	0.64	GO:0036474	BP	2	cell death in response to hydrogen peroxide	8	cell death - oxidative stress	CELL DEATH
0.0337	12	3127	9	0.003	0.75	GO:0010421	BP	2	hydrogen peroxide-mediated programmed cell death	9	cell death - oxidative stress	CELL DEATH
2.32E-09	59	3127	34	0.011	0.576	GO:1903201	BP	2	regulation of oxidative stress-induced cell death	6	cell death - oxidative stress	CELL DEATH
0.000629	23	3127	15	0.005	0.652	GO:1903205	BP	2	regulation of hydrogen peroxide-induced cell death	7	cell death - oxidative stress	CELL DEATH
2.09E-10	45	3127	30	0.01	0.667	GO:0008631	BP	2	intrinsic apoptotic signaling pathway in response to oxidative stress	7	cell death - oxidative stress	CELL DEATH
0.0015	8	3127	8	0.003	1	GO:0036480	BP	2	neuron intrinsic apoptotic signaling pathway in response to oxidative stress	8	cell death - oxidative stress	CELL DEATH
0.00000319	30	3127	20	0.006	0.667	GO:1902175	BP	2	regulation of oxidative stress-induced intrinsic apoptotic signaling pathway	8	cell death - oxidative stress	CELL DEATH
0.0015	8	3127	8	0.003	1	GO:1903376	BP	2	regulation of oxidative stress-induced neuron intrinsic apoptotic signaling pathway	9	cell death - oxidative stress	CELL DEATH
0.000151	41	3127	22	0.007	0.537	GO:1903202	BP	2	negative regulation of oxidative stress-induced cell death	5	cell death - oxidative stress	CELL DEATH
0.000424	20	3127	14	0.004	0.7	GO:1902176	BP	2	negative regulation of oxidative stress-induced intrinsic apoptotic signaling pathway	7	cell death - oxidative stress	CELL DEATH
0.0213	14	3127	10	0.003	0.714	GO:1903209	BP	2	positive regulation of oxidative stress-induced cell death	1	cell death - oxidative stress	CELL DEATH
4.38E-57	576	3127	260	0.083	0.451	GO:0097190	BP	2	apoptotic signaling pathway	5	cell death - signalling	CELL DEATH
6.91E-37	373	3127	170	0.054	0.456	GO:2001233	BP	2	regulation of apoptotic signaling pathway	6	cell death - signalling	CELL DEATH
0.0115	9	3127	8	0.003	0.889	GO:0071550	BP	2	death-inducing signaling complex assembly	7	cell death - signalling	CELL DEATH
3.3E-24	177	3127	92	0.029	0.52	GO:2001235	BP	2	positive regulation of apoptotic signaling pathway	5	cell death - signalling	CELL DEATH
6.95E-18	204	3127	91	0.029	0.446	GO:2001234	BP	2	negative regulation of apoptotic signaling pathway	5	cell death - signalling	CELL DEATH
0.00104	16	3127	12	0.004	0.75	GO:0090672	BP	2	telomerase RNA localization	5	chomatin - telomere	CHROMATIN
0.00104	16	3127	12	0.004	0.75	GO:0090671	BP	2	telomerase RNA localization to Cajal body	6	chomatin - telomere	CHROMATIN
8.52E-14	161	3127	72	0.023	0.447	GO:0032200	BP	2	telomere organization	6	chomatin - telomere	CHROMATIN
5.53E-15	148	3127	70	0.022	0.473	GO:0000723	BP	2	telomere maintenance	7	chomatin - telomere	CHROMATIN
1.19E-14	73	3127	45	0.014	0.616	GO:0010833	BP	2	telomere maintenance via telomere lengthening	8	chomatin - telomere	CHROMATIN
9.13E-15	57	3127	39	0.012	0.684	GO:0007004	BP	2	telomere maintenance via telomerase	9	chomatin - telomere	CHROMATIN
0.00716	13	3127	10	0.003	0.769	GO:1904814	BP	2	regulation of protein localization to chromosome, telomeric region	6	chomatin - telomere	CHROMATIN
5.42E-15	72	3127	45	0.014	0.625	GO:0032204	BP	2	regulation of telomere maintenance	7	chomatin - telomere	CHROMATIN
3.35E-11	56	3127	35	0.011	0.625	GO:1904356	BP	2	regulation of telomere maintenance via telomere lengthening	8	chomatin - telomere	CHROMATIN
0.0000131	46	3127	25	0.008	0.543	GO:0051972	BP	2	regulation of telomerase activity	8	chomatin - telomere	CHROMATIN
8.29E-11	44	3127	30	0.01	0.682	GO:0032210	BP	2	regulation of telomere maintenance via telomerase	8	chomatin - telomere	CHROMATIN
3.93E-10	51	3127	32	0.01	0.627	GO:0032206	BP	2	positive regulation of telomere maintenance	7	chomatin - telomere	CHROMATIN
2.66E-08	35	3127	24	0.008	0.686	GO:1904358	BP	2	positive regulation of telomere maintenance via telomere lengthening	8	chomatin - telomere	CHROMATIN
1.54E-08	32	3127	23	0.007	0.719	GO:0032212	BP	2	positive regulation of telomere maintenance via telomerase	7	chomatin - telomere	CHROMATIN
0.00617	29	3127	16	0.005	0.552	GO:0032205	BP	2	negative regulation of telomere maintenance	7	chomatin - telomere	CHROMATIN
6.24E-40	1166	3127	377	0.121	0.323	GO:0051276	BP	2	chromosome organization	5	chromatin - organisation	CHROMATIN
7.61E-19	749	3127	228	0.073	0.304	GO:0006325	BP	2	chromatin organization	4	chromatin - organisation	CHROMATIN
6.71E-16	543	3127	173	0.055	0.319	GO:0016569	BP	2	covalent chromatin modification	5	chromatin - organisation	CHROMATIN
7.58E-26	288	3127	128	0.041	0.444	GO:0033044	BP	2	regulation of chromosome organization	6	chromatin - organisation	CHROMATIN
1.03E-10	158	3127	66	0.021	0.418	GO:1902275	BP	2	regulation of chromatin organization	7	chromatin - organisation	CHROMATIN
9.89E-21	151	3127	79	0.025	0.523	GO:2001252	BP	2	positive regulation of chromosome organization	6	chromatin - organisation	CHROMATIN
0.00000653	109	3127	44	0.014	0.404	GO:2001251	BP	2	negative regulation of chromosome organization	6	chromatin - organisation	CHROMATIN
3.02E-09	87	3127	43	0.014	0.494	GO:1905269	BP	2	positive regulation of chromatin organization	7	chromatin - organisation	CHROMATIN
2.86E-16	434	3127	148	0.047	0.341	GO:0016570	BP	2	histone modification	6	histone	CHROMATIN
0.000000199	132	3127	53	0.017	0.402	GO:0031056	BP	2	regulation of histone modification	7	histone	CHROMATIN
0.000000279	80	3127	38	0.012	0.475	GO:0031058	BP	2	positive regulation of histone modification	7	histone	CHROMATIN
0.0000155	79	3127	35	0.011	0.443	GO:0016575	BP	2	histone deacetylation	7	histone - acetylation	CHROMATIN
0.0044	20	3127	13	0.004	0.65	GO:0070932	BP	2	histone H3 deacetylation	8	histone - acetylation	CHROMATIN
0.0325	49	3127	21	0.007	0.429	GO:0035065	BP	2	regulation of histone acetylation	8	histone - acetylation	CHROMATIN
0.000000112	34	3127	23	0.007	0.676	GO:0016572	BP	2	histone phosphorylation	7	histone - phosphorylation	CHROMATIN
0.000148	35	3127	20	0.006	0.571	GO:0051973	BP	2	positive regulation of telomerase activity	7	telomers	CHROMATIN
0.024	98	3127	34	0.011	0.347	GO:0046545	BP	2	development of primary female sexual characteristics	6	development	DEVELOPMENT
0.0373	20	3127	12	0.004	0.6	GO:0036344	BP	2	platelet morphogenesis	7	development	DEVELOPMENT
0.0176	19	3127	12	0.004	0.632	GO:0030220	BP	2	platelet formation	8	development	DEVELOPMENT
0.0104	83	3127	31	0.01	0.373	GO:0022602	BP	2	ovulation cycle process	5	development	DEVELOPMENT
0.0143	181	3127	54	0.017	0.298	GO:0030278	BP	2	regulation of ossification	4	development	DEVELOPMENT
0.0243	94	3127	33	0.011	0.351	GO:0008585	BP	2	female gonad development	1	development	DEVELOPMENT
1.94E-62	5887	3127	1385	0.443	0.235	GO:0032502	BP	2	developmental process	2	development	DEVELOPMENT
0.0243	153	3127	47	0.015	0.307	GO:0098727	BP	2	maintenance of cell number	3	development	DEVELOPMENT
2.42E-52	5476	3127	1276	0.408	0.233	GO:0048856	BP	2	anatomical structure development	3	development	DEVELOPMENT
3.05E-20	1888	3127	472	0.151	0.25	GO:0009888	BP	2	tissue development	4	development	DEVELOPMENT
9.38E-43	2404	3127	653	0.209	0.272	GO:0009653	BP	2	anatomical structure morphogenesis	3	development	DEVELOPMENT
2.56E-13	970	3127	259	0.083	0.267	GO:0048646	BP	2	anatomical structure formation involved in morphogenesis	3	development	DEVELOPMENT
0.0023	146	3127	48	0.015	0.329	GO:0048771	BP	2	tissue remodeling	4	development	DEVELOPMENT
0.0104	247	3127	69	0.022	0.279	GO:0021700	BP	2	developmental maturation	4	development	DEVELOPMENT
5.66E-14	731	3127	210	0.067	0.287	GO:0060322	BP	2	head development	4	development	DEVELOPMENT
3.88E-17	581	3127	185	0.059	0.318	GO:0048589	BP	2	developmental growth	4	development	DEVELOPMENT
0.00033	146	3127	50	0.016	0.342	GO:0035265	BP	2	organ growth	5	development	DEVELOPMENT
0.00000154	210	3127	71	0.023	0.338	GO:0060560	BP	2	developmental growth involved in morphogenesis	5	development	DEVELOPMENT
0.000534	148	3127	50	0.016	0.338	GO:0035264	BP	2	multicellular organism growth	5	development	DEVELOPMENT
0.0316	150	3127	46	0.015	0.307	GO:0019827	BP	2	stem cell population maintenance	4	development	DEVELOPMENT
1.23E-48	5029	3127	1181	0.378	0.235	GO:0007275	BP	2	multicellular organism development	4	development	DEVELOPMENT
2.07E-48	4479	3127	1078	0.345	0.241	GO:0048731	BP	2	system development	5	development	DEVELOPMENT
0.00191	141	3127	47	0.015	0.333	GO:0061008	BP	2	hepaticobiliary system development	6	development	DEVELOPMENT
1.05E-31	3286	3127	790	0.253	0.24	GO:0048513	BP	2	animal organ development	6	development	DEVELOPMENT
4.25E-11	584	3127	169	0.054	0.289	GO:0035295	BP	2	tube development	5	development	DEVELOPMENT
6.28E-18	624	3127	197	0.063	0.316	GO:0048729	BP	2	tissue morphogenesis	4	development	DEVELOPMENT
9.63E-14	434	3127	142	0.045	0.327	GO:0048732	BP	2	gland development	4	development	DEVELOPMENT
0.0025	138	3127	46	0.015	0.333	GO:0001889	BP	2	liver development	5	development	DEVELOPMENT
0.000000187	354	3127	107	0.034	0.302	GO:0035239	BP	2	tube morphogenesis	4	development	DEVELOPMENT
2.78E-11	991	3127	256	0.082	0.258	GO:0009887	BP	2	animal organ morphogenesis	4	development	DEVELOPMENT
0.00359	123	3127	42	0.013	0.341	GO:0022612	BP	2	gland morphogenesis	5	development	DEVELOPMENT
0.0023	146	3127	48	0.015	0.329	GO:0035148	BP	2	tube formation	4	development	DEVELOPMENT
0.0187	89	3127	32	0.01	0.36	GO:0060606	BP	2	tube closure	5	development	DEVELOPMENT
5.57E-18	773	3127	231	0.074	0.299	GO:0048534	BP	2	hematopoietic or lymphoid organ development	4	development	DEVELOPMENT
0.00615	45	3127	21	0.007	0.467	GO:0048538	BP	2	thymus development	5	development	DEVELOPMENT
1.65E-20	485	3127	170	0.054	0.351	GO:0016049	BP	2	cell growth	4	development	DEVELOPMENT
9.33E-54	4000	3127	1005	0.321	0.251	GO:0048869	BP	2	cellular developmental process	4	development	DEVELOPMENT
3.89E-42	1907	3127	547	0.175	0.287	GO:0048468	BP	2	cell development	5	development	DEVELOPMENT
0.000000277	191	3127	68	0.022	0.356	GO:0048588	BP	2	developmental cell growth	6	development	DEVELOPMENT
3.09E-35	1012	3127	330	0.106	0.326	GO:0032989	BP	2	cellular component morphogenesis	4	development	DEVELOPMENT
1.18E-23	616	3127	209	0.067	0.339	GO:0032990	BP	2	cell part morphogenesis	5	development	DEVELOPMENT
2.28E-33	920	3127	304	0.097	0.33	GO:0000902	BP	2	cell morphogenesis	5	development	DEVELOPMENT
5.64E-17	324	3127	122	0.039	0.377	GO:0032535	BP	2	regulation of cellular component size	4	development	DEVELOPMENT
0.00000212	151	3127	56	0.018	0.371	GO:0008361	BP	2	regulation of cell size	5	development	DEVELOPMENT
0.00889	148	3127	47	0.015	0.318	GO:0001890	BP	2	placenta development	5	development	DEVELOPMENT
2.28E-52	2248	3127	648	0.207	0.288	GO:0050793	BP	2	regulation of developmental process	3	development	DEVELOPMENT
7.55E-22	935	3127	278	0.089	0.297	GO:0022603	BP	2	regulation of anatomical structure morphogenesis	4	development	DEVELOPMENT
5.93E-36	1709	3127	487	0.156	0.285	GO:2000026	BP	2	regulation of multicellular organismal development	4	development	DEVELOPMENT
0.000000157	250	3127	83	0.027	0.332	GO:2000027	BP	2	regulation of organ morphogenesis	5	development	DEVELOPMENT
2.5E-10	293	3127	100	0.032	0.341	GO:0048638	BP	2	regulation of developmental growth	4	development	DEVELOPMENT
0.0241	82	3127	30	0.01	0.366	GO:0046620	BP	2	regulation of organ growth	5	development	DEVELOPMENT
6.92E-09	148	3127	60	0.019	0.405	GO:0060491	BP	2	regulation of cell projection assembly	6	development	DEVELOPMENT
2.96E-15	378	3127	132	0.042	0.349	GO:0001558	BP	2	regulation of cell growth	5	development	DEVELOPMENT
1.19E-14	429	3127	143	0.046	0.333	GO:0022604	BP	2	regulation of cell morphogenesis	5	development	DEVELOPMENT
8.37E-22	789	3127	245	0.078	0.311	GO:0060284	BP	2	regulation of cell development	5	development	DEVELOPMENT
1.14E-25	1176	3127	342	0.109	0.291	GO:0051094	BP	2	positive regulation of developmental process	3	development	DEVELOPMENT
1.98E-12	461	3127	145	0.046	0.315	GO:0010720	BP	2	positive regulation of cell development	5	development	DEVELOPMENT
2.85E-10	245	3127	88	0.028	0.359	GO:0045927	BP	2	positive regulation of growth	3	development	DEVELOPMENT
0.0000188	163	3127	57	0.018	0.35	GO:0048639	BP	2	positive regulation of developmental growth	4	development	DEVELOPMENT
3.66E-08	153	3127	60	0.019	0.392	GO:0030307	BP	2	positive regulation of cell growth	4	development	DEVELOPMENT
2.69E-13	824	3127	228	0.073	0.277	GO:0051093	BP	2	negative regulation of developmental process	3	development	DEVELOPMENT
0.0000144	276	3127	84	0.027	0.304	GO:0010721	BP	2	negative regulation of cell development	5	development	DEVELOPMENT
0.00000697	225	3127	73	0.023	0.324	GO:0045926	BP	2	negative regulation of growth	3	development	DEVELOPMENT
0.0000319	157	3127	55	0.018	0.35	GO:0030308	BP	2	negative regulation of cell growth	4	development	DEVELOPMENT
0.0373	20	3127	12	0.004	0.6	GO:1903429	BP	2	regulation of cell maturation	1	development	DEVELOPMENT
1.46E-26	945	3127	293	0.094	0.31	GO:0040007	BP	2	growth	2	development	DEVELOPMENT
1.9E-61	5800	3127	1366	0.437	0.236	GO:0044767	BP	2	single-organism developmental process	3	development	DEVELOPMENT
4.84E-21	625	3127	205	0.066	0.328	GO:0040008	BP	2	regulation of growth	3	development	DEVELOPMENT
9.83E-16	435	3127	147	0.047	0.338	GO:0090066	BP	2	regulation of anatomical structure size	4	development	DEVELOPMENT
0.006	32	3127	17	0.005	0.531	GO:0098751	BP	2	bone cell development	1	development	DEVELOPMENT
0.000562	108	3127	40	0.013	0.37	GO:0042552	BP	2	myelination	6	development - brain	DEVELOPMENT
0.0112	30	3127	16	0.005	0.533	GO:0031641	BP	2	regulation of myelination	4	development - brain	DEVELOPMENT
3.6E-37	2216	3127	597	0.191	0.269	GO:0007399	BP	2	nervous system development	6	development - brain	DEVELOPMENT
6.59E-16	920	3127	257	0.082	0.279	GO:0007417	BP	2	central nervous system development	6	development - brain	DEVELOPMENT
3.64E-12	697	3127	197	0.063	0.283	GO:0007420	BP	2	brain development	4	development - brain	DEVELOPMENT
0.000000127	374	3127	112	0.036	0.299	GO:0030900	BP	2	forebrain development	4	development - brain	DEVELOPMENT
0.0000306	245	3127	76	0.024	0.31	GO:0021537	BP	2	telencephalon development	5	development - brain	DEVELOPMENT
0.00000102	168	3127	61	0.02	0.363	GO:0021543	BP	2	pallium development	6	development - brain	DEVELOPMENT
0.00123	160	3127	52	0.017	0.325	GO:0021915	BP	2	neural tube development	4	development - brain	DEVELOPMENT
0.000251	113	3127	42	0.013	0.372	GO:0021987	BP	2	cerebral cortex development	4	development - brain	DEVELOPMENT
3.09E-17	769	3127	228	0.073	0.296	GO:0051960	BP	2	regulation of nervous system development	5	development - brain	DEVELOPMENT
1.99E-08	462	3127	134	0.043	0.29	GO:0051962	BP	2	positive regulation of nervous system development	4	development - brain	DEVELOPMENT
0.0000829	259	3127	78	0.025	0.301	GO:0051961	BP	2	negative regulation of nervous system development	4	development - brain	DEVELOPMENT
0.00378	103	3127	37	0.012	0.359	GO:0001841	BP	2	neural tube formation	2	development - brain	DEVELOPMENT
0.0313	79	3127	29	0.009	0.367	GO:0021766	BP	2	hippocampus development	4	development - brain	DEVELOPMENT
8.48E-18	939	3127	267	0.085	0.284	GO:0072359	BP	2	circulatory system development	6	development - cardiovascular	DEVELOPMENT
0.00000121	616	3127	161	0.051	0.261	GO:0072358	BP	2	cardiovascular system development	6	development - cardiovascular	DEVELOPMENT
0.0000007	607	3127	160	0.051	0.264	GO:0001944	BP	2	vasculature development	6	development - cardiovascular	DEVELOPMENT
2.15E-14	508	3127	161	0.051	0.317	GO:0007507	BP	2	heart development	4	development - cardiovascular	DEVELOPMENT
0.00243	229	3127	67	0.021	0.293	GO:0003007	BP	2	heart morphogenesis	5	development - cardiovascular	DEVELOPMENT
0.00000288	188	3127	65	0.021	0.346	GO:0048738	BP	2	cardiac muscle tissue development	5	development - cardiovascular	DEVELOPMENT
0.000000783	584	3127	155	0.05	0.265	GO:0001568	BP	2	blood vessel development	4	development - cardiovascular	DEVELOPMENT
0.0000389	499	3127	131	0.042	0.263	GO:0048514	BP	2	blood vessel morphogenesis	4	development - cardiovascular	DEVELOPMENT
0.000226	417	3127	111	0.035	0.266	GO:0001525	BP	2	angiogenesis	4	development - cardiovascular	DEVELOPMENT
0.0000371	122	3127	46	0.015	0.377	GO:0035051	BP	2	cardiocyte differentiation	6	development - cardiovascular	DEVELOPMENT
0.000159	100	3127	39	0.012	0.39	GO:0055007	BP	2	cardiac muscle cell differentiation	7	development - cardiovascular	DEVELOPMENT
0.00279	50	3127	23	0.007	0.46	GO:0043535	BP	2	regulation of blood vessel endothelial cell migration	9	development - cardiovascular	DEVELOPMENT
3.88E-50	3828	3127	960	0.307	0.251	GO:0030154	BP	2	cell differentiation	5	development - cell differentiation	DEVELOPMENT
0.00165	209	3127	63	0.02	0.301	GO:0045444	BP	2	fat cell differentiation	6	development - cell differentiation	DEVELOPMENT
0.000000103	364	3127	110	0.035	0.302	GO:0042692	BP	2	muscle cell differentiation	6	development - cell differentiation	DEVELOPMENT
0.0000233	201	3127	66	0.021	0.328	GO:0001649	BP	2	osteoblast differentiation	6	development - cell differentiation	DEVELOPMENT
0.00407	170	3127	53	0.017	0.312	GO:0048762	BP	2	mesenchymal cell differentiation	6	development - cell differentiation	DEVELOPMENT
0.00487	112	3127	39	0.012	0.348	GO:0001837	BP	2	epithelial to mesenchymal transition	7	development - cell differentiation	DEVELOPMENT
0.00000802	95	3127	40	0.013	0.421	GO:0030218	BP	2	erythrocyte differentiation	7	development - cell differentiation	DEVELOPMENT
1.53E-21	658	3127	214	0.068	0.325	GO:0000904	BP	2	cell morphogenesis involved in differentiation	6	development - cell differentiation	DEVELOPMENT
3.8E-37	1527	3127	451	0.144	0.295	GO:0045595	BP	2	regulation of cell differentiation	4	development - cell differentiation	DEVELOPMENT
0.0000012	255	3127	82	0.026	0.322	GO:0010769	BP	2	regulation of cell morphogenesis involved in differentiation	6	development - cell differentiation	DEVELOPMENT
0.0444	113	3127	37	0.012	0.327	GO:0045598	BP	2	regulation of fat cell differentiation	5	development - cell differentiation	DEVELOPMENT
0.0195	165	3127	50	0.016	0.303	GO:0051147	BP	2	regulation of muscle cell differentiation	5	development - cell differentiation	DEVELOPMENT
0.0369	108	3127	36	0.012	0.333	GO:0045667	BP	2	regulation of osteoblast differentiation	5	development - cell differentiation	DEVELOPMENT
0.0000809	37	3127	21	0.007	0.568	GO:0045646	BP	2	regulation of erythrocyte differentiation	6	development - cell differentiation	DEVELOPMENT
7.32E-23	847	3127	261	0.083	0.308	GO:0045597	BP	2	positive regulation of cell differentiation	4	development - cell differentiation	DEVELOPMENT
0.0000407	134	3127	49	0.016	0.366	GO:0010770	BP	2	positive regulation of cell morphogenesis involved in differentiation	6	development - cell differentiation	DEVELOPMENT
0.00947	36	3127	18	0.006	0.5	GO:0010718	BP	2	positive regulation of epithelial to mesenchymal transition	4	development - cell differentiation	DEVELOPMENT
0.000629	23	3127	15	0.005	0.652	GO:0045648	BP	2	positive regulation of erythrocyte differentiation	6	development - cell differentiation	DEVELOPMENT
4.22E-11	625	3127	178	0.057	0.285	GO:0045596	BP	2	negative regulation of cell differentiation	4	development - cell differentiation	DEVELOPMENT
0.0115	9	3127	8	0.003	0.889	GO:0060215	BP	2	primitive hemopoiesis	2	development - cell differentiation	DEVELOPMENT
5.67E-61	1944	3127	604	0.193	0.311	GO:0008283	BP	2	cell proliferation	3	development - cell proliferation	DEVELOPMENT
1.48E-10	349	3127	114	0.036	0.327	GO:0050673	BP	2	epithelial cell proliferation	4	development - cell proliferation	DEVELOPMENT
0.000000587	85	3127	39	0.012	0.459	GO:0048144	BP	2	fibroblast proliferation	4	development - cell proliferation	DEVELOPMENT
4.73E-46	1526	3127	474	0.152	0.311	GO:0042127	BP	2	regulation of cell proliferation	4	development - cell proliferation	DEVELOPMENT
0.000000377	84	3127	39	0.012	0.464	GO:0048145	BP	2	regulation of fibroblast proliferation	5	development - cell proliferation	DEVELOPMENT
2.42E-08	292	3127	95	0.03	0.325	GO:0050678	BP	2	regulation of epithelial cell proliferation	5	development - cell proliferation	DEVELOPMENT
2.66E-21	839	3127	255	0.082	0.304	GO:0008284	BP	2	positive regulation of cell proliferation	4	development - cell proliferation	DEVELOPMENT
0.000325	52	3127	25	0.008	0.481	GO:0048146	BP	2	positive regulation of fibroblast proliferation	5	development - cell proliferation	DEVELOPMENT
0.00288	164	3127	52	0.017	0.317	GO:0050679	BP	2	positive regulation of epithelial cell proliferation	5	development - cell proliferation	DEVELOPMENT
1.24E-17	636	3127	199	0.064	0.313	GO:0008285	BP	2	negative regulation of cell proliferation	4	development - cell proliferation	DEVELOPMENT
0.00479	116	3127	40	0.013	0.345	GO:0050680	BP	2	negative regulation of epithelial cell proliferation	5	development - cell proliferation	DEVELOPMENT
0.000272	33	3127	19	0.006	0.576	GO:0097421	BP	2	liver regeneration	6	development - cell proliferation	DEVELOPMENT
3e-15	958	3127	263	0.084	0.275	GO:0009790	BP	2	embryo development	5	development - embryology	DEVELOPMENT
5.82E-14	574	3127	175	0.056	0.305	GO:0009792	BP	2	embryo development ending in birth or egg hatching	6	development - embryology	DEVELOPMENT
6.29E-14	570	3127	174	0.056	0.305	GO:0043009	BP	2	chordate embryonic development	7	development - embryology	DEVELOPMENT
1.3E-13	324	3127	115	0.037	0.355	GO:0001701	BP	2	in utero embryonic development	8	development - embryology	DEVELOPMENT
0.00315	226	3127	66	0.021	0.292	GO:0060485	BP	2	mesenchyme development	7	development - embryology	DEVELOPMENT
0.00149	574	3127	140	0.045	0.244	GO:0048598	BP	2	embryonic morphogenesis	4	development - embryology	DEVELOPMENT
0.0408	178	3127	52	0.017	0.292	GO:0007369	BP	2	gastrulation	5	development - embryology	DEVELOPMENT
0.0204	22	3127	13	0.004	0.591	GO:0035162	BP	2	embryonic hemopoiesis	1	development - embryology	DEVELOPMENT
0.012	124	3127	41	0.013	0.331	GO:0001838	BP	2	embryonic epithelial tube formation	1	development - embryology	DEVELOPMENT
2.31E-14	1227	3127	316	0.101	0.258	GO:0060429	BP	2	epithelium development	5	development - epithelium	DEVELOPMENT
4.49E-16	524	3127	169	0.054	0.323	GO:0002009	BP	2	morphogenesis of an epithelium	5	development - epithelium	DEVELOPMENT
0.000211	68	3127	30	0.01	0.441	GO:0061180	BP	2	mammary gland epithelium development	6	development - epithelium	DEVELOPMENT
0.021	28	3127	15	0.005	0.536	GO:0033598	BP	2	mammary gland epithelial cell proliferation	7	development - epithelium	DEVELOPMENT
0.0000173	317	3127	93	0.03	0.293	GO:0060562	BP	2	epithelial tube morphogenesis	5	development - epithelium	DEVELOPMENT
0.0275	132	3127	42	0.013	0.318	GO:0072175	BP	2	epithelial tube formation	5	development - epithelium	DEVELOPMENT
0.00249	198	3127	60	0.019	0.303	GO:0002064	BP	2	epithelial cell development	6	development - epithelium	DEVELOPMENT
5.02E-09	177	3127	68	0.022	0.384	GO:1905330	BP	2	regulation of morphogenesis of an epithelium	5	development - epithelium	DEVELOPMENT
4.33E-11	250	3127	91	0.029	0.364	GO:0042063	BP	2	gliogenesis	7	development - glia	DEVELOPMENT
0.000000587	85	3127	39	0.012	0.459	GO:0021782	BP	2	glial cell development	6	development - glia	DEVELOPMENT
0.0404	96	3127	33	0.011	0.344	GO:0014013	BP	2	regulation of gliogenesis	7	development - glia	DEVELOPMENT
1.58E-10	185	3127	73	0.023	0.395	GO:0010001	BP	2	glial cell differentiation	6	development - glia - cell differentiation	DEVELOPMENT
0.00442	84	3127	32	0.01	0.381	GO:0048709	BP	2	oligodendrocyte differentiation	7	development - glia - cell differentiation	DEVELOPMENT
0.000256	65	3127	29	0.009	0.446	GO:0048708	BP	2	astrocyte differentiation	7	development - glia - cell differentiation	DEVELOPMENT
0.0129	76	3127	29	0.009	0.382	GO:0014812	BP	2	muscle cell migration	7	development - muscle	DEVELOPMENT
0.0201	66	3127	26	0.008	0.394	GO:0014909	BP	2	smooth muscle cell migration	8	development - muscle	DEVELOPMENT
0.00105	58	3127	26	0.008	0.448	GO:0014910	BP	2	regulation of smooth muscle cell migration	7	development - muscle	DEVELOPMENT
0.0177	34	3127	17	0.005	0.5	GO:0014911	BP	2	positive regulation of smooth muscle cell migration	6	development - muscle	DEVELOPMENT
0.0105	136	3127	44	0.014	0.324	GO:0061351	BP	2	neural precursor cell proliferation	4	development - neuronal	DEVELOPMENT
1.12E-08	203	3127	74	0.024	0.365	GO:0016358	BP	2	dendrite development	7	development - neuronal	DEVELOPMENT
0.000591	124	3127	44	0.014	0.355	GO:0048813	BP	2	dendrite morphogenesis	8	development - neuronal	DEVELOPMENT
0.0325	49	3127	21	0.007	0.429	GO:0031102	BP	2	neuron projection regeneration	5	development - neuronal	DEVELOPMENT
0.00443	128	3127	43	0.014	0.336	GO:0050773	BP	2	regulation of dendrite development	9	development - neuronal	DEVELOPMENT
0.000145	240	3127	73	0.023	0.304	GO:0050768	BP	2	negative regulation of neurogenesis	6	development - neuronal	DEVELOPMENT
0.0102	188	3127	56	0.018	0.298	GO:0045665	BP	2	negative regulation of neuron differentiation	7	development - neuronal	DEVELOPMENT
0.00836	94	3127	34	0.011	0.362	GO:0014020	BP	2	primary neural tube formation	3	development - neuronal	DEVELOPMENT
0.0142	88	3127	32	0.01	0.364	GO:0001843	BP	2	neural tube closure	4	development - neuronal	DEVELOPMENT
0.000434	111	3127	41	0.013	0.369	GO:0007272	BP	2	ensheathment of neurons	4	development - neuronal	DEVELOPMENT
1.85E-38	1470	3127	442	0.141	0.301	GO:0022008	BP	2	neurogenesis	6	development - neuronal	DEVELOPMENT
4.32E-36	1372	3127	414	0.132	0.302	GO:0048699	BP	2	generation of neurons	7	development - neuronal	DEVELOPMENT
1.93E-31	1248	3127	374	0.12	0.3	GO:0030182	BP	2	neuron differentiation	6	development - neuronal	DEVELOPMENT
8.03E-33	994	3127	320	0.102	0.322	GO:0048666	BP	2	neuron development	6	development - neuronal	DEVELOPMENT
8.05E-16	531	3127	170	0.054	0.32	GO:0048667	BP	2	cell morphogenesis involved in neuron differentiation	7	development - neuronal	DEVELOPMENT
8.25E-18	682	3127	210	0.067	0.308	GO:0050767	BP	2	regulation of neurogenesis	6	development - neuronal	DEVELOPMENT
3.49E-13	557	3127	169	0.054	0.303	GO:0045664	BP	2	regulation of neuron differentiation	7	development - neuronal	DEVELOPMENT
1.75E-10	401	3127	126	0.04	0.314	GO:0050769	BP	2	positive regulation of neurogenesis	5	development - neuronal	DEVELOPMENT
0.000000144	322	3127	100	0.032	0.311	GO:0045666	BP	2	positive regulation of neuron differentiation	6	development - neuronal	DEVELOPMENT
0.00325	83	3127	32	0.01	0.386	GO:0120034	BP	2	positive regulation of plasma membrane bounded cell projection assembly	4	development - neuronal - axon	DEVELOPMENT
0.000693	47	3127	23	0.007	0.489	GO:0060997	BP	2	dendritic spine morphogenesis	8	development - neuronal - axon	DEVELOPMENT
0.0135	40	3127	19	0.006	0.475	GO:0031103	BP	2	axon regeneration	6	development - neuronal - axon	DEVELOPMENT
0.0113	68	3127	27	0.009	0.397	GO:1900006	BP	2	positive regulation of dendrite development	8	development - neuronal - axon	DEVELOPMENT
0.00835	39	3127	19	0.006	0.487	GO:0060999	BP	2	positive regulation of dendritic spine development	9	development - neuronal - axon	DEVELOPMENT
0.000434	111	3127	41	0.013	0.369	GO:0008366	BP	2	axon ensheathment	5	development - neuronal - axon	DEVELOPMENT
0.00000325	59	3127	30	0.01	0.508	GO:0097061	BP	2	dendritic spine organization	6	development - neuronal - axon	DEVELOPMENT
7.45E-35	872	3127	296	0.095	0.339	GO:0031175	BP	2	neuron projection development	6	development - neuronal - axon	DEVELOPMENT
1.03E-08	83	3127	41	0.013	0.494	GO:0060996	BP	2	dendritic spine development	8	development - neuronal - axon	DEVELOPMENT
2.66E-14	462	3127	150	0.048	0.325	GO:0061564	BP	2	axon development	7	development - neuronal - axon	DEVELOPMENT
8.15E-21	581	3127	194	0.062	0.334	GO:0048812	BP	2	neuron projection morphogenesis	7	development - neuronal - axon	DEVELOPMENT
6.45E-14	428	3127	141	0.045	0.329	GO:0007409	BP	2	axonogenesis	8	development - neuronal - axon	DEVELOPMENT
0.00000197	143	3127	54	0.017	0.378	GO:1990138	BP	2	neuron projection extension	8	development - neuronal - axon	DEVELOPMENT
0.0000823	224	3127	70	0.022	0.312	GO:0097485	BP	2	neuron projection guidance	8	development - neuronal - axon	DEVELOPMENT
0.0000549	222	3127	70	0.022	0.315	GO:0007411	BP	2	axon guidance	9	development - neuronal - axon	DEVELOPMENT
5.34E-15	409	3127	139	0.044	0.34	GO:0010975	BP	2	regulation of neuron projection development	8	development - neuronal - axon	DEVELOPMENT
0.00047	63	3127	28	0.009	0.444	GO:0060998	BP	2	regulation of dendritic spine development	10	development - neuronal - axon	DEVELOPMENT
0.000654	153	3127	51	0.016	0.333	GO:0050770	BP	2	regulation of axonogenesis	9	development - neuronal - axon	DEVELOPMENT
1.63E-10	239	3127	87	0.028	0.364	GO:0010976	BP	2	positive regulation of neuron projection development	7	development - neuronal - axon	DEVELOPMENT
0.00218	121	3127	42	0.013	0.347	GO:0010977	BP	2	negative regulation of neuron projection development	8	development - neuronal - axon	DEVELOPMENT
2.97E-08	123	3127	52	0.017	0.423	GO:0007164	BP	2	establishment of tissue polarity	4	development - polarity	DEVELOPMENT
5.74E-10	134	3127	58	0.019	0.433	GO:0001738	BP	2	morphogenesis of a polarized epithelium	6	development - polarity	DEVELOPMENT
2.97E-08	123	3127	52	0.017	0.423	GO:0001736	BP	2	establishment of planar polarity	7	development - polarity	DEVELOPMENT
9.58E-16	171	3127	78	0.025	0.456	GO:0007163	BP	2	establishment or maintenance of cell polarity	4	development - polarity	DEVELOPMENT
4.54E-10	106	3127	50	0.016	0.472	GO:0030010	BP	2	establishment of cell polarity	5	development - polarity	DEVELOPMENT
0.00000027	111	3127	47	0.015	0.423	GO:0090175	BP	2	regulation of establishment of planar polarity	6	development - polarity	DEVELOPMENT
0.00544	23	3127	14	0.004	0.609	GO:0032878	BP	2	regulation of establishment or maintenance of cell polarity	4	development - polarity	DEVELOPMENT
0.0373	20	3127	12	0.004	0.6	GO:2000114	BP	2	regulation of establishment of cell polarity	5	development - polarity	DEVELOPMENT
0.0354	112	3127	37	0.012	0.33	GO:0046660	BP	2	female sex differentiation	5	development - reproductive system	DEVELOPMENT
0.000000094	426	3127	124	0.04	0.291	GO:0061458	BP	2	reproductive system development	6	development - reproductive system	DEVELOPMENT
0.00000327	137	3127	52	0.017	0.38	GO:0030879	BP	2	mammary gland development	5	development - reproductive system	DEVELOPMENT
0.00182	19	3127	13	0.004	0.684	GO:0061377	BP	2	mammary gland lobule development	4	development - reproductive system	DEVELOPMENT
0.00182	19	3127	13	0.004	0.684	GO:0060749	BP	2	mammary gland alveolus development	4	development - reproductive system	DEVELOPMENT
0.000000158	634	3127	168	0.054	0.265	GO:0003006	BP	2	developmental process involved in reproduction	3	development - reproductive system	DEVELOPMENT
0.00000022	422	3127	122	0.039	0.289	GO:0048608	BP	2	reproductive structure development	4	development - reproductive system	DEVELOPMENT
3.04E-08	102	3127	46	0.015	0.451	GO:0051101	BP	2	regulation of DNA binding	5	DNA metabolism	DNA METABOLISM
0.00000711	48	3127	26	0.008	0.542	GO:0043388	BP	2	positive regulation of DNA binding	6	DNA metabolism	DNA METABOLISM
0.0111	24	3127	14	0.004	0.583	GO:0000737	BP	2	DNA catabolic process, endonucleolytic	8	DNA metabolism	DNA METABOLISM
2.39E-34	974	3127	319	0.102	0.328	GO:0006259	BP	2	DNA metabolic process	7	DNA metabolism	DNA METABOLISM
0.0218	266	3127	72	0.023	0.271	GO:0006310	BP	2	DNA recombination	8	DNA metabolism	DNA METABOLISM
0.00000155	295	3127	91	0.029	0.308	GO:0006260	BP	2	DNA replication	6	DNA metabolism	DNA METABOLISM
7.52E-14	196	3127	82	0.026	0.418	GO:0071897	BP	2	DNA biosynthetic process	6	DNA metabolism	DNA METABOLISM
0.0000878	233	3127	72	0.023	0.309	GO:0006352	BP	2	DNA-templated transcription, initiation	7	DNA metabolism	DNA METABOLISM
0.00000703	281	3127	86	0.028	0.306	GO:0071103	BP	2	DNA conformation change	6	DNA metabolism	DNA METABOLISM
0.000386	84	3127	34	0.011	0.405	GO:0032392	BP	2	DNA geometric change	7	DNA metabolism	DNA METABOLISM
0.0069	74	3127	29	0.009	0.392	GO:0032508	BP	2	DNA duplex unwinding	8	DNA metabolism	DNA METABOLISM
2.3E-29	370	3127	157	0.05	0.424	GO:0051052	BP	2	regulation of DNA metabolic process	6	DNA metabolism	DNA METABOLISM
0.0164	117	3127	39	0.012	0.333	GO:0006275	BP	2	regulation of DNA replication	7	DNA metabolism	DNA METABOLISM
3.02E-12	93	3127	49	0.016	0.527	GO:2000278	BP	2	regulation of DNA biosynthetic process	7	DNA metabolism	DNA METABOLISM
8.06E-13	119	3127	58	0.019	0.487	GO:0043620	BP	2	regulation of DNA-templated transcription in response to stress	10	DNA metabolism	DNA METABOLISM
2.52E-20	208	3127	96	0.031	0.462	GO:0051054	BP	2	positive regulation of DNA metabolic process	6	DNA metabolism	DNA METABOLISM
0.0207	55	3127	23	0.007	0.418	GO:0045740	BP	2	positive regulation of DNA replication	6	DNA metabolism	DNA METABOLISM
4.69E-09	63	3127	35	0.011	0.556	GO:2000573	BP	2	positive regulation of DNA biosynthetic process	6	DNA metabolism	DNA METABOLISM
0.000341	118	3127	43	0.014	0.364	GO:0051053	BP	2	negative regulation of DNA metabolic process	6	DNA metabolism	DNA METABOLISM
1.73E-37	795	3127	283	0.091	0.356	GO:0006974	BP	2	cellular response to DNA damage stimulus	5	DNA metabolism - damage	DNA METABOLISM
0.0015	8	3127	8	0.003	1	GO:0006975	BP	2	DNA damage induced protein phosphorylation	6	DNA metabolism - damage	DNA METABOLISM
1.03E-16	166	3127	78	0.025	0.47	GO:2001020	BP	2	regulation of response to DNA damage stimulus	5	DNA metabolism - damage	DNA METABOLISM
5.64E-16	121	3127	63	0.02	0.521	GO:0042770	BP	2	signal transduction in response to DNA damage	6	DNA metabolism - damage	DNA METABOLISM
0.0014	73	3127	30	0.01	0.411	GO:2001022	BP	2	positive regulation of response to DNA damage stimulus	4	DNA metabolism - damage	DNA METABOLISM
0.0000169	59	3127	29	0.009	0.492	GO:2001021	BP	2	negative regulation of response to DNA damage stimulus	4	DNA metabolism - damage	DNA METABOLISM
0.00327	28	3127	16	0.005	0.571	GO:1902230	BP	2	negative regulation of intrinsic apoptotic signaling pathway in response to DNA damage	7	DNA metabolism - damage - cell death	DNA METABOLISM
2.48E-14	97	3127	53	0.017	0.546	GO:0008630	BP	2	intrinsic apoptotic signaling pathway in response to DNA damage	7	DNA metabolism - damage - cell death	DNA METABOLISM
0.00000684	42	3127	24	0.008	0.571	GO:0042771	BP	2	intrinsic apoptotic signaling pathway in response to DNA damage by p53 class mediator	8	DNA metabolism - damage - cell death	DNA METABOLISM
0.000282	36	3127	20	0.006	0.556	GO:1902229	BP	2	regulation of intrinsic apoptotic signaling pathway in response to DNA damage	8	DNA metabolism - damage - cell death	DNA METABOLISM
6.43E-12	107	3127	53	0.017	0.495	GO:0030330	BP	2	DNA damage response, signal transduction by p53 class mediator	7	DNA metabolism - damage - checkpoint	DNA METABOLISM
3.54E-13	161	3127	71	0.023	0.441	GO:0031570	BP	2	DNA integrity checkpoint	6	DNA metabolism - damage - checkpoint	DNA METABOLISM
4.14E-13	151	3127	68	0.022	0.45	GO:0000077	BP	2	DNA damage checkpoint	7	DNA metabolism - damage - checkpoint	DNA METABOLISM
0.00000025	70	3127	35	0.011	0.5	GO:0044783	BP	2	G1 DNA damage checkpoint	8	DNA metabolism - damage - checkpoint	DNA METABOLISM
5.25E-08	64	3127	34	0.011	0.531	GO:0072401	BP	2	signal transduction involved in DNA integrity checkpoint	7	DNA metabolism - damage - checkpoint	DNA METABOLISM
5.25E-08	64	3127	34	0.011	0.531	GO:0072422	BP	2	signal transduction involved in DNA damage checkpoint	8	DNA metabolism - damage - checkpoint	DNA METABOLISM
3.8E-09	104	3127	48	0.015	0.462	GO:0044774	BP	2	mitotic DNA integrity checkpoint	7	DNA metabolism - damage - checkpoint	DNA METABOLISM
0.000000553	62	3127	32	0.01	0.516	GO:1902403	BP	2	signal transduction involved in mitotic DNA integrity checkpoint	8	DNA metabolism - damage - checkpoint	DNA METABOLISM
1.52E-08	97	3127	45	0.014	0.464	GO:0044773	BP	2	mitotic DNA damage checkpoint	8	DNA metabolism - damage - checkpoint	DNA METABOLISM
0.000000553	62	3127	32	0.01	0.516	GO:1902402	BP	2	signal transduction involved in mitotic DNA damage checkpoint	9	DNA metabolism - damage - checkpoint	DNA METABOLISM
0.00000175	61	3127	31	0.01	0.508	GO:1902400	BP	2	intracellular signal transduction involved in G1 DNA damage checkpoint	8	DNA metabolism - damage - checkpoint	DNA METABOLISM
0.000000149	69	3127	35	0.011	0.507	GO:0031571	BP	2	mitotic G1 DNA damage checkpoint	10	DNA metabolism - damage - checkpoint	DNA METABOLISM
0.00000175	61	3127	31	0.01	0.508	GO:0072431	BP	2	signal transduction involved in mitotic G1 DNA damage checkpoint	9	DNA metabolism - damage - checkpoint	DNA METABOLISM
0.00000548	60	3127	30	0.01	0.5	GO:0006977	BP	2	DNA damage response, signal transduction by p53 class mediator resulting in cell cycle arrest	10	DNA metabolism - damage - checkpoint	DNA METABOLISM
1.02E-12	523	3127	160	0.051	0.306	GO:0006281	BP	2	DNA repair	6	DNA metabolism - repair	DNA METABOLISM
0.0000456	115	3127	44	0.014	0.383	GO:0006289	BP	2	nucleotide-excision repair	7	DNA metabolism - repair	DNA METABOLISM
0.0238	211	3127	60	0.019	0.284	GO:0006302	BP	2	double-strand break repair	7	DNA metabolism - repair	DNA METABOLISM
0.000000377	84	3127	39	0.012	0.464	GO:0006282	BP	2	regulation of DNA repair	6	DNA metabolism - repair	DNA METABOLISM
1.06E-18	1491	3127	386	0.123	0.259	GO:0006952	BP	2	defense response	4	immune system	IMMUNE RESPONSE
1.85E-43	2816	3127	739	0.236	0.262	GO:0002376	BP	2	immune system process	2	immune system	IMMUNE RESPONSE
2.17E-16	1158	3127	309	0.099	0.267	GO:0002252	BP	2	immune effector process	3	immune system	IMMUNE RESPONSE
2.44E-25	2008	3127	515	0.165	0.256	GO:0006955	BP	2	immune response	3	immune system	IMMUNE RESPONSE
2.85E-09	124	3127	54	0.017	0.435	GO:0002262	BP	2	myeloid cell homeostasis	6	immune system	IMMUNE RESPONSE
1.34E-20	812	3127	247	0.079	0.304	GO:0002520	BP	2	immune system development	6	immune system	IMMUNE RESPONSE
2.6E-10	669	3127	185	0.059	0.277	GO:0002263	BP	2	cell activation involved in immune response	5	immune system	IMMUNE RESPONSE
2.54E-22	650	3127	214	0.068	0.329	GO:0031347	BP	2	regulation of defense response	5	immune system	IMMUNE RESPONSE
1.62E-35	1397	3127	418	0.134	0.299	GO:0002682	BP	2	regulation of immune system process	3	immune system	IMMUNE RESPONSE
0.000000862	292	3127	91	0.029	0.312	GO:0002697	BP	2	regulation of immune effector process	4	immune system	IMMUNE RESPONSE
2.12E-29	957	3127	303	0.097	0.317	GO:0050776	BP	2	regulation of immune response	4	immune system	IMMUNE RESPONSE
2.24E-21	414	3127	154	0.049	0.372	GO:0031349	BP	2	positive regulation of defense response	4	immune system	IMMUNE RESPONSE
1.71E-30	1006	3127	317	0.101	0.315	GO:0002684	BP	2	positive regulation of immune system process	3	immune system	IMMUNE RESPONSE
0.000148	155	3127	53	0.017	0.342	GO:0002699	BP	2	positive regulation of immune effector process	4	immune system	IMMUNE RESPONSE
7.15E-30	744	3127	254	0.081	0.341	GO:0050778	BP	2	positive regulation of immune response	4	immune system	IMMUNE RESPONSE
1.01E-29	615	3127	222	0.071	0.361	GO:0002253	BP	2	activation of immune response	5	immune system	IMMUNE RESPONSE
0.000000478	377	3127	111	0.035	0.294	GO:0002683	BP	2	negative regulation of immune system process	3	immune system	IMMUNE RESPONSE
1.08E-12	226	3127	88	0.028	0.389	GO:0019882	BP	2	antigen processing and presentation	3	immune system - antigen presentation	IMMUNE RESPONSE
1.05E-13	179	3127	77	0.025	0.43	GO:0048002	BP	2	antigen processing and presentation of peptide antigen	4	immune system - antigen presentation	IMMUNE RESPONSE
0.00036	95	3127	37	0.012	0.389	GO:0002474	BP	2	antigen processing and presentation of peptide antigen via MHC class I	5	immune system - antigen presentation	IMMUNE RESPONSE
1.74E-14	171	3127	76	0.024	0.444	GO:0019884	BP	2	antigen processing and presentation of exogenous antigen	4	immune system - antigen presentation	IMMUNE RESPONSE
3.85E-15	164	3127	75	0.024	0.457	GO:0002478	BP	2	antigen processing and presentation of exogenous peptide antigen	5	immune system - antigen presentation	IMMUNE RESPONSE
0.00156	77	3127	31	0.01	0.403	GO:0042590	BP	2	antigen processing and presentation of exogenous peptide antigen via MHC class I	6	immune system - antigen presentation	IMMUNE RESPONSE
0.00199	74	3127	30	0.01	0.405	GO:0002479	BP	2	antigen processing and presentation of exogenous peptide antigen via MHC class I, TAP-dependent	7	immune system - antigen presentation	IMMUNE RESPONSE
1.28E-09	95	3127	46	0.015	0.484	GO:0002504	BP	2	antigen processing and presentation of peptide or polysaccharide antigen via MHC class II	4	immune system - antigen presentation	IMMUNE RESPONSE
2.86E-10	92	3127	46	0.015	0.5	GO:0002495	BP	2	antigen processing and presentation of peptide antigen via MHC class II	5	immune system - antigen presentation	IMMUNE RESPONSE
3.15E-10	89	3127	45	0.014	0.506	GO:0019886	BP	2	antigen processing and presentation of exogenous peptide antigen via MHC class II	6	immune system - antigen presentation	IMMUNE RESPONSE
1.45E-09	606	3127	169	0.054	0.279	GO:0002274	BP	2	myeloid leukocyte activation	6	immune system - differentiation	IMMUNE RESPONSE
1.67E-12	334	3127	115	0.037	0.344	GO:0030099	BP	2	myeloid cell differentiation	6	immune system - differentiation	IMMUNE RESPONSE
0.000013	186	3127	63	0.02	0.339	GO:0002573	BP	2	myeloid leukocyte differentiation	7	immune system - differentiation	IMMUNE RESPONSE
0.000000359	184	3127	66	0.021	0.359	GO:0045637	BP	2	regulation of myeloid cell differentiation	5	immune system - differentiation	IMMUNE RESPONSE
0.0313	79	3127	29	0.009	0.367	GO:0045639	BP	2	positive regulation of myeloid cell differentiation	5	immune system - differentiation	IMMUNE RESPONSE
0.00000062	535	3127	145	0.046	0.271	GO:0002444	BP	2	myeloid leukocyte mediated immunity	5	immune system - innate	IMMUNE RESPONSE
0.00000922	493	3127	132	0.042	0.268	GO:0002446	BP	2	neutrophil mediated immunity	6	immune system - innate	IMMUNE RESPONSE
0.000003	485	3127	132	0.042	0.272	GO:0042119	BP	2	neutrophil activation	8	immune system - innate	IMMUNE RESPONSE
0.00000287	480	3127	131	0.042	0.273	GO:0002283	BP	2	neutrophil activation involved in immune response	8	immune system - innate	IMMUNE RESPONSE
0.00000287	480	3127	131	0.042	0.273	GO:0043312	BP	2	neutrophil degranulation	8	immune system - innate	IMMUNE RESPONSE
3.22E-08	529	3127	148	0.047	0.28	GO:0002275	BP	2	myeloid cell activation involved in immune response	7	immune system - innate	IMMUNE RESPONSE
0.0271	650	3127	149	0.048	0.229	GO:0006954	BP	2	inflammatory response	5	immune system - innate	IMMUNE RESPONSE
1.1E-21	861	3127	261	0.083	0.303	GO:0045087	BP	2	innate immune response	4	immune system - innate	IMMUNE RESPONSE
7.06E-26	385	3127	155	0.05	0.403	GO:0045088	BP	2	regulation of innate immune response	5	immune system - innate	IMMUNE RESPONSE
1.03E-23	322	3127	134	0.043	0.416	GO:0045089	BP	2	positive regulation of innate immune response	5	immune system - innate	IMMUNE RESPONSE
1.33E-21	281	3127	119	0.038	0.423	GO:0002218	BP	2	activation of innate immune response	6	immune system - innate	IMMUNE RESPONSE
5.47E-21	274	3127	116	0.037	0.423	GO:0002758	BP	2	innate immune response-activating signal transduction	7	immune system - innate	IMMUNE RESPONSE
1.44E-13	122	3127	60	0.019	0.492	GO:0002220	BP	2	innate immune response activating cell surface receptor signaling pathway	8	immune system - innate	IMMUNE RESPONSE
0.0000515	822	3127	196	0.063	0.238	GO:0002443	BP	2	leukocyte mediated immunity	4	immune system - leukocytes	IMMUNE RESPONSE
0.00000304	82	3127	37	0.012	0.451	GO:0001776	BP	2	leukocyte homeostasis	6	immune system - leukocytes	IMMUNE RESPONSE
1.28E-13	332	3127	117	0.037	0.352	GO:0007159	BP	2	leukocyte cell-cell adhesion	5	immune system - leukocytes	IMMUNE RESPONSE
0.0000261	266	3127	81	0.026	0.305	GO:0070661	BP	2	leukocyte proliferation	4	immune system - leukocytes	IMMUNE RESPONSE
0.0000616	253	3127	77	0.025	0.304	GO:0032943	BP	2	mononuclear cell proliferation	5	immune system - leukocytes	IMMUNE RESPONSE
1.14E-23	1180	3127	337	0.108	0.286	GO:0045321	BP	2	leukocyte activation	5	immune system - leukocytes	IMMUNE RESPONSE
0.00000529	489	3127	132	0.042	0.27	GO:0036230	BP	2	granulocyte activation	7	immune system - leukocytes	IMMUNE RESPONSE
3.87E-10	667	3127	184	0.059	0.276	GO:0002366	BP	2	leukocyte activation involved in immune response	6	immune system - leukocytes	IMMUNE RESPONSE
0.000204	97	3127	38	0.012	0.392	GO:0071887	BP	2	leukocyte apoptotic process	7	immune system - leukocytes	IMMUNE RESPONSE
8.03E-12	468	3127	145	0.046	0.31	GO:0002521	BP	2	leukocyte differentiation	6	immune system - leukocytes	IMMUNE RESPONSE
7.19E-08	525	3127	146	0.047	0.278	GO:0043299	BP	2	leukocyte degranulation	7	immune system - leukocytes	IMMUNE RESPONSE
0.000534	148	3127	50	0.016	0.338	GO:0002703	BP	2	regulation of leukocyte mediated immunity	5	immune system - leukocytes	IMMUNE RESPONSE
0.00019	198	3127	63	0.02	0.318	GO:0070663	BP	2	regulation of leukocyte proliferation	5	immune system - leukocytes	IMMUNE RESPONSE
0.000106	191	3127	62	0.02	0.325	GO:0032944	BP	2	regulation of mononuclear cell proliferation	6	immune system - leukocytes	IMMUNE RESPONSE
4.08E-12	482	3127	149	0.048	0.309	GO:0002694	BP	2	regulation of leukocyte activation	5	immune system - leukocytes	IMMUNE RESPONSE
0.000000576	239	3127	79	0.025	0.331	GO:1902105	BP	2	regulation of leukocyte differentiation	5	immune system - leukocytes	IMMUNE RESPONSE
0.00222	109	3127	39	0.012	0.358	GO:0002761	BP	2	regulation of myeloid leukocyte differentiation	6	immune system - leukocytes	IMMUNE RESPONSE
1.27E-13	304	3127	110	0.035	0.362	GO:1903037	BP	2	regulation of leukocyte cell-cell adhesion	5	immune system - leukocytes	IMMUNE RESPONSE
0.0417	84	3127	30	0.01	0.357	GO:0002705	BP	2	positive regulation of leukocyte mediated immunity	5	immune system - leukocytes	IMMUNE RESPONSE
0.000000495	324	3127	99	0.032	0.306	GO:0002696	BP	2	positive regulation of leukocyte activation	4	immune system - leukocytes	IMMUNE RESPONSE
9.21E-11	206	3127	79	0.025	0.383	GO:1903039	BP	2	positive regulation of leukocyte cell-cell adhesion	5	immune system - leukocytes	IMMUNE RESPONSE
0.0186	143	3127	45	0.014	0.315	GO:0002695	BP	2	negative regulation of leukocyte activation	4	immune system - leukocytes	IMMUNE RESPONSE
0.00038	11	3127	10	0.003	0.909	GO:0006924	BP	2	activation-induced cell death of T cells	10	immune system - lymphocytes	IMMUNE RESPONSE
0.0000379	64	3127	30	0.01	0.469	GO:0002260	BP	2	lymphocyte homeostasis	7	immune system - lymphocytes	IMMUNE RESPONSE
0.0135	40	3127	19	0.006	0.475	GO:0043029	BP	2	T cell homeostasis	8	immune system - lymphocytes	IMMUNE RESPONSE
9.79E-16	654	3127	198	0.063	0.303	GO:0046649	BP	2	lymphocyte activation	6	immune system - lymphocytes	IMMUNE RESPONSE
0.00434	269	3127	75	0.024	0.279	GO:0042113	BP	2	B cell activation	7	immune system - lymphocytes	IMMUNE RESPONSE
2.28E-14	436	3127	144	0.046	0.33	GO:0042110	BP	2	T cell activation	7	immune system - lymphocytes	IMMUNE RESPONSE
0.0000421	251	3127	77	0.025	0.307	GO:0046651	BP	2	lymphocyte proliferation	7	immune system - lymphocytes	IMMUNE RESPONSE
0.00169	170	3127	54	0.017	0.318	GO:0042098	BP	2	T cell proliferation	8	immune system - lymphocytes	IMMUNE RESPONSE
0.00176	70	3127	29	0.009	0.414	GO:0070227	BP	2	lymphocyte apoptotic process	8	immune system - lymphocytes	IMMUNE RESPONSE
0.0325	49	3127	21	0.007	0.429	GO:0070231	BP	2	T cell apoptotic process	9	immune system - lymphocytes	IMMUNE RESPONSE
0.0000266	315	3127	92	0.029	0.292	GO:0030098	BP	2	lymphocyte differentiation	7	immune system - lymphocytes	IMMUNE RESPONSE
0.00127	212	3127	64	0.02	0.302	GO:0030217	BP	2	T cell differentiation	8	immune system - lymphocytes	IMMUNE RESPONSE
6.85E-12	424	3127	135	0.043	0.318	GO:0051249	BP	2	regulation of lymphocyte activation	6	immune system - lymphocytes	IMMUNE RESPONSE
0.0000848	190	3127	62	0.02	0.326	GO:0050670	BP	2	regulation of lymphocyte proliferation	7	immune system - lymphocytes	IMMUNE RESPONSE
1.58E-13	289	3127	106	0.034	0.367	GO:0050863	BP	2	regulation of T cell activation	6	immune system - lymphocytes	IMMUNE RESPONSE
0.00377	144	3127	47	0.015	0.326	GO:0042129	BP	2	regulation of T cell proliferation	7	immune system - lymphocytes	IMMUNE RESPONSE
0.00000145	299	3127	92	0.029	0.308	GO:0051251	BP	2	positive regulation of lymphocyte activation	5	immune system - lymphocytes	IMMUNE RESPONSE
0.0000343	74	3127	33	0.011	0.446	GO:0031294	BP	2	lymphocyte costimulation	6	immune system - lymphocytes	IMMUNE RESPONSE
1.96E-10	197	3127	76	0.024	0.386	GO:0050870	BP	2	positive regulation of T cell activation	6	immune system - lymphocytes	IMMUNE RESPONSE
0.0000147	72	3127	33	0.011	0.458	GO:0031295	BP	2	T cell costimulation	7	immune system - lymphocytes	IMMUNE RESPONSE
0.00218	121	3127	42	0.013	0.347	GO:0051250	BP	2	negative regulation of lymphocyte activation	5	immune system - lymphocytes	IMMUNE RESPONSE
4.43E-36	593	3127	229	0.073	0.386	GO:0002764	BP	2	immune response-regulating signaling pathway	5	immune system - receptors	IMMUNE RESPONSE
7.81E-29	447	3127	177	0.057	0.396	GO:0002768	BP	2	immune response-regulating cell surface receptor signaling pathway	6	immune system - receptors	IMMUNE RESPONSE
9.09E-09	127	3127	54	0.017	0.425	GO:0002433	BP	2	immune response-regulating cell surface receptor signaling pathway involved in phagocytosis	7	immune system - receptors	IMMUNE RESPONSE
2e-31	562	3127	212	0.068	0.377	GO:0002757	BP	2	immune response-activating signal transduction	6	immune system - receptors	IMMUNE RESPONSE
5.09E-24	417	3127	160	0.051	0.384	GO:0002429	BP	2	immune response-activating cell surface receptor signaling pathway	7	immune system - receptors	IMMUNE RESPONSE
9.91E-19	252	3127	106	0.034	0.421	GO:0050851	BP	2	antigen receptor-mediated signaling pathway	8	immune system - receptors	IMMUNE RESPONSE
0.00722	42	3127	20	0.006	0.476	GO:0050854	BP	2	regulation of antigen receptor-mediated signaling pathway	9	immune system - receptors	IMMUNE RESPONSE
3.55E-25	167	3127	90	0.029	0.539	GO:0050852	BP	2	T cell receptor signaling pathway	9	immune system - receptors	IMMUNE RESPONSE
0.000497	31	3127	18	0.006	0.581	GO:0050856	BP	2	regulation of T cell receptor signaling pathway	10	immune system - receptors	IMMUNE RESPONSE
1.93E-21	802	3127	247	0.079	0.308	GO:0034097	BP	2	response to cytokine	5	immune system - signalling - cytokine	IMMUNE RESPONSE
0.000000408	284	3127	90	0.029	0.317	GO:0034612	BP	2	response to tumor necrosis factor	6	immune system - signalling - cytokine	IMMUNE RESPONSE
1.49E-16	631	3127	195	0.062	0.309	GO:0001816	BP	2	cytokine production	4	immune system - signalling - cytokine	IMMUNE RESPONSE
0.000729	105	3127	39	0.012	0.371	GO:0071706	BP	2	tumor necrosis factor superfamily cytokine production	5	immune system - signalling - cytokine	IMMUNE RESPONSE
0.000521	100	3127	38	0.012	0.38	GO:0032640	BP	2	tumor necrosis factor production	6	immune system - signalling - cytokine	IMMUNE RESPONSE
2.55E-16	709	3127	212	0.068	0.299	GO:0071345	BP	2	cellular response to cytokine stimulus	6	immune system - signalling - cytokine	IMMUNE RESPONSE
0.00000586	267	3127	83	0.027	0.311	GO:0071356	BP	2	cellular response to tumor necrosis factor	7	immune system - signalling - cytokine	IMMUNE RESPONSE
1.42E-17	572	3127	184	0.059	0.322	GO:0001817	BP	2	regulation of cytokine production	4	immune system - signalling - cytokine	IMMUNE RESPONSE
0.00217	101	3127	37	0.012	0.366	GO:1903555	BP	2	regulation of tumor necrosis factor superfamily cytokine production	5	immune system - signalling - cytokine	IMMUNE RESPONSE
0.000909	98	3127	37	0.012	0.378	GO:0032680	BP	2	regulation of tumor necrosis factor production	6	immune system - signalling - cytokine	IMMUNE RESPONSE
0.00000834	148	3127	54	0.017	0.365	GO:0060759	BP	2	regulation of response to cytokine stimulus	4	immune system - signalling - cytokine	IMMUNE RESPONSE
3.69E-09	552	3127	156	0.05	0.283	GO:0019221	BP	2	cytokine-mediated signaling pathway	6	immune system - signalling - cytokine	IMMUNE RESPONSE
1.75E-08	162	3127	63	0.02	0.389	GO:0033209	BP	2	tumor necrosis factor-mediated signaling pathway	7	immune system - signalling - cytokine	IMMUNE RESPONSE
0.0000417	142	3127	51	0.016	0.359	GO:0001959	BP	2	regulation of cytokine-mediated signaling pathway	6	immune system - signalling - cytokine	IMMUNE RESPONSE
0.00354	54	3127	24	0.008	0.444	GO:0010803	BP	2	regulation of tumor necrosis factor-mediated signaling pathway	7	immune system - signalling - cytokine	IMMUNE RESPONSE
3.09E-08	384	3127	116	0.037	0.302	GO:0001819	BP	2	positive regulation of cytokine production	4	immune system - signalling - cytokine	IMMUNE RESPONSE
0.00000149	214	3127	72	0.023	0.336	GO:0001818	BP	2	negative regulation of cytokine production	4	immune system - signalling - cytokine	IMMUNE RESPONSE
1.33E-11	115	3127	55	0.018	0.478	GO:0032606	BP	2	type I interferon production	5	immune system - signalling - interferon	IMMUNE RESPONSE
0.00209	46	3127	22	0.007	0.478	GO:0032608	BP	2	interferon-beta production	6	immune system - signalling - interferon	IMMUNE RESPONSE
8.26E-12	114	3127	55	0.018	0.482	GO:0032479	BP	2	regulation of type I interferon production	5	immune system - signalling - interferon	IMMUNE RESPONSE
0.00388	44	3127	21	0.007	0.477	GO:0032648	BP	2	regulation of interferon-beta production	6	immune system - signalling - interferon	IMMUNE RESPONSE
0.00000126	70	3127	34	0.011	0.486	GO:0032481	BP	2	positive regulation of type I interferon production	5	immune system - signalling - interferon	IMMUNE RESPONSE
0.000462	43	3127	22	0.007	0.512	GO:0032480	BP	2	negative regulation of type I interferon production	5	immune system - signalling - interferon	IMMUNE RESPONSE
0.0415	80	3127	29	0.009	0.362	GO:0060333	BP	2	interferon-gamma-mediated signaling pathway	1	immune system - signalling - interferon	IMMUNE RESPONSE
0.0029	57	3127	25	0.008	0.439	GO:0032623	BP	2	interleukin-2 production	5	immune system - signalling - interleukin	IMMUNE RESPONSE
0.0473	50	3127	21	0.007	0.42	GO:0032615	BP	2	interleukin-12 production	5	immune system - signalling - interleukin	IMMUNE RESPONSE
0.012	50	3127	22	0.007	0.44	GO:0032663	BP	2	regulation of interleukin-2 production	5	immune system - signalling - interleukin	IMMUNE RESPONSE
1.21E-14	111	3127	58	0.019	0.523	GO:0038061	BP	2	NIK/NF-kappaB signaling	6	immune system - signalling - NFkappaB	IMMUNE RESPONSE
7.98E-17	257	3127	104	0.033	0.405	GO:0007249	BP	2	I-kappaB kinase/NF-kappaB signaling	6	immune system - signalling - NFkappaB	IMMUNE RESPONSE
0.0000438	45	3127	24	0.008	0.533	GO:1901222	BP	2	regulation of NIK/NF-kappaB signaling	7	immune system - signalling - NFkappaB	IMMUNE RESPONSE
1.76E-16	230	3127	96	0.031	0.417	GO:0043122	BP	2	regulation of I-kappaB kinase/NF-kappaB signaling	7	immune system - signalling - NFkappaB	IMMUNE RESPONSE
8.72E-14	175	3127	76	0.024	0.434	GO:0043123	BP	2	positive regulation of I-kappaB kinase/NF-kappaB signaling	6	immune system - signalling - NFkappaB	IMMUNE RESPONSE
3.93E-08	131	3127	54	0.017	0.412	GO:0002224	BP	2	toll-like receptor signaling pathway	9	immune system - signalling - toll-like	IMMUNE RESPONSE
0.00179	33	3127	18	0.006	0.545	GO:0002756	BP	2	MyD88-independent toll-like receptor signaling pathway	10	immune system - signalling - toll-like	IMMUNE RESPONSE
0.00327	28	3127	16	0.005	0.571	GO:0035666	BP	2	TRIF-dependent toll-like receptor signaling pathway	11	immune system - signalling - toll-like	IMMUNE RESPONSE
0.0000629	551	3127	141	0.045	0.256	GO:0042330	BP	2	taxis	3	motility	MOTILITY
0.0000557	550	3127	141	0.045	0.256	GO:0006935	BP	2	chemotaxis	4	motility	MOTILITY
9.4E-47	1876	3127	553	0.177	0.295	GO:0006928	BP	2	movement of cell or subcellular component	4	motility	MOTILITY
2.04E-25	1407	3127	391	0.125	0.278	GO:0048870	BP	2	cell motility	5	motility	MOTILITY
1.48E-19	723	3127	224	0.072	0.31	GO:2000145	BP	2	regulation of cell motility	5	motility	MOTILITY
8.62E-14	400	3127	134	0.043	0.335	GO:2000147	BP	2	positive regulation of cell motility	4	motility	MOTILITY
2.75E-10	233	3127	85	0.027	0.365	GO:0090130	BP	2	tissue migration	4	motility - cell migration	MOTILITY
1.53E-10	227	3127	84	0.027	0.37	GO:0090132	BP	2	epithelium migration	5	motility - cell migration	MOTILITY
1.27E-24	1278	3127	361	0.115	0.282	GO:0016477	BP	2	cell migration	6	motility - cell migration	MOTILITY
3.77E-13	308	3127	110	0.035	0.357	GO:0001667	BP	2	ameboidal-type cell migration	7	motility - cell migration	MOTILITY
6.38E-11	224	3127	84	0.027	0.375	GO:0010631	BP	2	epithelial cell migration	8	motility - cell migration	MOTILITY
0.0000111	153	3127	55	0.018	0.359	GO:0043542	BP	2	endothelial cell migration	9	motility - cell migration	MOTILITY
0.0000147	72	3127	33	0.011	0.458	GO:0043534	BP	2	blood vessel endothelial cell migration	10	motility - cell migration	MOTILITY
1.61E-16	671	3127	204	0.065	0.304	GO:0030334	BP	2	regulation of cell migration	6	motility - cell migration	MOTILITY
0.00000659	167	3127	59	0.019	0.353	GO:0010632	BP	2	regulation of epithelial cell migration	7	motility - cell migration	MOTILITY
0.017	113	3127	38	0.012	0.336	GO:0010594	BP	2	regulation of endothelial cell migration	8	motility - cell migration	MOTILITY
6.21E-15	385	3127	133	0.043	0.345	GO:0030335	BP	2	positive regulation of cell migration	5	motility - cell migration	MOTILITY
0.000544	104	3127	39	0.012	0.375	GO:0010634	BP	2	positive regulation of epithelial cell migration	6	motility - cell migration	MOTILITY
0.0000606	23	3127	16	0.005	0.696	GO:0070841	BP	2	inclusion body assembly	5	intracellular organisation	ORGANIZATION / CYTOSKELETON
8.84E-165	6164	3127	1697	0.543	0.275	GO:0071840	BP	2	cellular component organization or biogenesis	2	intracellular organisation	ORGANIZATION / CYTOSKELETON
1.22E-153	5956	3127	1635	0.523	0.275	GO:0016043	BP	2	cellular component organization	3	intracellular organisation	ORGANIZATION / CYTOSKELETON
3.32E-25	517	3127	188	0.06	0.364	GO:0022411	BP	2	cellular component disassembly	4	intracellular organisation	ORGANIZATION / CYTOSKELETON
7.68E-22	745	3127	235	0.075	0.315	GO:0044802	BP	2	single-organism membrane organization	5	intracellular organisation	ORGANIZATION / CYTOSKELETON
5.68E-81	1595	3127	567	0.181	0.355	GO:1902589	BP	2	single-organism organelle organization	5	intracellular organisation	ORGANIZATION / CYTOSKELETON
4.37E-96	2655	3127	842	0.269	0.317	GO:0022607	BP	2	cellular component assembly	4	intracellular organisation	ORGANIZATION / CYTOSKELETON
6.43E-104	2262	3127	770	0.246	0.34	GO:0051128	BP	2	regulation of cellular component organization	4	intracellular organisation	ORGANIZATION / CYTOSKELETON
4.22E-73	1155	3127	443	0.142	0.384	GO:0051130	BP	2	positive regulation of cellular component organization	4	intracellular organisation	ORGANIZATION / CYTOSKELETON
7.47E-33	590	3127	222	0.071	0.376	GO:0051129	BP	2	negative regulation of cellular component organization	4	intracellular organisation	ORGANIZATION / CYTOSKELETON
0.0112	30	3127	16	0.005	0.533	GO:0098534	BP	2	centriole assembly	5	intracellular organisation - cytoskeleton	ORGANIZATION / CYTOSKELETON
0.00913	7	3127	7	0.002	1	GO:2000601	BP	13	positive regulation of Arp2/3 complex-mediated actin nucleation	1	intracellular organisation - cytoskeleton	ORGANIZATION / CYTOSKELETON
0.0394	39	3127	18	0.006	0.462	GO:0061245	BP	2	establishment or maintenance of bipolar cell polarity	5	intracellular organisation - cytoskeleton	ORGANIZATION / CYTOSKELETON
0.0394	39	3127	18	0.006	0.462	GO:0035088	BP	2	establishment or maintenance of apical/basal cell polarity	6	intracellular organisation - cytoskeleton	ORGANIZATION / CYTOSKELETON
0.00052	53	3127	25	0.008	0.472	GO:1905515	BP	2	non-motile cilium assembly	8	intracellular organisation - cytoskeleton	ORGANIZATION / CYTOSKELETON
1.51E-34	96	3127	73	0.023	0.76	GO:0097711	BP	2	ciliary basal body docking	8	intracellular organisation - cytoskeleton	ORGANIZATION / CYTOSKELETON
0.00165	27	3127	16	0.005	0.593	GO:0007099	BP	2	centriole replication	4	intracellular organisation - cytoskeleton	ORGANIZATION / CYTOSKELETON
7.33E-22	283	3127	120	0.038	0.424	GO:1902903	BP	2	regulation of supramolecular fiber organization	5	intracellular organisation - cytoskeleton	ORGANIZATION / CYTOSKELETON
0.0105	33	3127	17	0.005	0.515	GO:2000249	BP	2	regulation of actin cytoskeleton reorganization	6	intracellular organisation - cytoskeleton	ORGANIZATION / CYTOSKELETON
2.53E-12	166	3127	71	0.023	0.428	GO:1902905	BP	2	positive regulation of supramolecular fiber organization	5	intracellular organisation - cytoskeleton	ORGANIZATION / CYTOSKELETON
0.0000226	109	3127	43	0.014	0.394	GO:1902904	BP	2	negative regulation of supramolecular fiber organization	5	intracellular organisation - cytoskeleton	ORGANIZATION / CYTOSKELETON
2e-29	670	3127	235	0.075	0.351	GO:0030029	BP	2	actin filament-based process	4	intracellular organisation - cytoskeleton	ORGANIZATION / CYTOSKELETON
0.0464	109	3127	36	0.012	0.33	GO:0070252	BP	2	actin-mediated cell contraction	6	intracellular organisation - cytoskeleton	ORGANIZATION / CYTOSKELETON
0.00145	42	3127	21	0.007	0.5	GO:0045103	BP	2	intermediate filament-based process	4	intracellular organisation - cytoskeleton	ORGANIZATION / CYTOSKELETON
1.78E-58	635	3127	279	0.089	0.439	GO:0007017	BP	2	microtubule-based process	3	intracellular organisation - cytoskeleton	ORGANIZATION / CYTOSKELETON
1.34E-19	335	3127	130	0.042	0.388	GO:0060271	BP	2	cilium assembly	7	intracellular organisation - cytoskeleton	ORGANIZATION / CYTOSKELETON
5.5E-16	153	3127	73	0.023	0.477	GO:0032886	BP	2	regulation of microtubule-based process	4	intracellular organisation - cytoskeleton	ORGANIZATION / CYTOSKELETON
5.37E-19	328	3127	127	0.041	0.387	GO:0032970	BP	2	regulation of actin filament-based process	4	intracellular organisation - cytoskeleton	ORGANIZATION / CYTOSKELETON
6.23E-71	1155	3127	439	0.14	0.38	GO:0007010	BP	2	cytoskeleton organization	5	intracellular organisation - cytoskeleton	ORGANIZATION / CYTOSKELETON
0.0000753	34	3127	20	0.006	0.588	GO:0030865	BP	2	cortical cytoskeleton organization	6	intracellular organisation - cytoskeleton	ORGANIZATION / CYTOSKELETON
2.63E-42	437	3127	197	0.063	0.451	GO:0000226	BP	2	microtubule cytoskeleton organization	6	intracellular organisation - cytoskeleton	ORGANIZATION / CYTOSKELETON
2.1E-10	82	3127	43	0.014	0.524	GO:0031109	BP	2	microtubule polymerization or depolymerization	7	intracellular organisation - cytoskeleton	ORGANIZATION / CYTOSKELETON
0.00015	19	3127	14	0.004	0.737	GO:0034453	BP	2	microtubule anchoring	7	intracellular organisation - cytoskeleton	ORGANIZATION / CYTOSKELETON
0.000861	41	3127	21	0.007	0.512	GO:0045104	BP	2	intermediate filament cytoskeleton organization	6	intracellular organisation - cytoskeleton	ORGANIZATION / CYTOSKELETON
1.57E-28	581	3127	211	0.067	0.363	GO:0030036	BP	2	actin cytoskeleton organization	6	intracellular organisation - cytoskeleton	ORGANIZATION / CYTOSKELETON
0.000000105	164	3127	62	0.02	0.378	GO:0031032	BP	2	actomyosin structure organization	7	intracellular organisation - cytoskeleton	ORGANIZATION / CYTOSKELETON
0.0000224	87	3127	37	0.012	0.425	GO:0031532	BP	2	actin cytoskeleton reorganization	7	intracellular organisation - cytoskeleton	ORGANIZATION / CYTOSKELETON
0.000117	29	3127	18	0.006	0.621	GO:0030866	BP	2	cortical actin cytoskeleton organization	7	intracellular organisation - cytoskeleton	ORGANIZATION / CYTOSKELETON
1.65E-32	550	3127	211	0.067	0.384	GO:0097435	BP	2	supramolecular fiber organization	4	intracellular organisation - cytoskeleton	ORGANIZATION / CYTOSKELETON
1.59E-18	343	3127	130	0.042	0.379	GO:0007015	BP	2	actin filament organization	5	intracellular organisation - cytoskeleton	ORGANIZATION / CYTOSKELETON
2.78E-09	131	3127	56	0.018	0.427	GO:0061572	BP	2	actin filament bundle organization	6	intracellular organisation - cytoskeleton	ORGANIZATION / CYTOSKELETON
8.61E-10	128	3127	56	0.018	0.438	GO:0051017	BP	2	actin filament bundle assembly	7	intracellular organisation - cytoskeleton	ORGANIZATION / CYTOSKELETON
0.000489	81	3127	33	0.011	0.407	GO:0030038	BP	2	contractile actin filament bundle assembly	8	intracellular organisation - cytoskeleton	ORGANIZATION / CYTOSKELETON
0.000000161	185	3127	67	0.021	0.362	GO:0008154	BP	2	actin polymerization or depolymerization	6	intracellular organisation - cytoskeleton	ORGANIZATION / CYTOSKELETON
8.44E-09	156	3127	62	0.02	0.397	GO:0030041	BP	2	actin filament polymerization	7	intracellular organisation - cytoskeleton	ORGANIZATION / CYTOSKELETON
1.38E-08	53	3127	31	0.01	0.585	GO:0046785	BP	2	microtubule polymerization	5	intracellular organisation - cytoskeleton	ORGANIZATION / CYTOSKELETON
4.52E-09	72	3127	38	0.012	0.528	GO:0097581	BP	2	lamellipodium organization	6	intracellular organisation - cytoskeleton	ORGANIZATION / CYTOSKELETON
1.17E-18	342	3127	130	0.042	0.38	GO:0044782	BP	2	cilium organization	6	intracellular organisation - cytoskeleton	ORGANIZATION / CYTOSKELETON
0.0000189	56	3127	28	0.009	0.5	GO:0030032	BP	2	lamellipodium assembly	7	intracellular organisation - cytoskeleton	ORGANIZATION / CYTOSKELETON
0.000000232	100	3127	44	0.014	0.44	GO:0031023	BP	2	microtubule organizing center organization	4	intracellular organisation - cytoskeleton	ORGANIZATION / CYTOSKELETON
1.91E-30	425	3127	174	0.056	0.409	GO:0051493	BP	2	regulation of cytoskeleton organization	6	intracellular organisation - cytoskeleton	ORGANIZATION / CYTOSKELETON
1.43E-15	129	3127	65	0.021	0.504	GO:0070507	BP	2	regulation of microtubule cytoskeleton organization	7	intracellular organisation - cytoskeleton	ORGANIZATION / CYTOSKELETON
6.78E-09	52	3127	31	0.01	0.596	GO:0031110	BP	2	regulation of microtubule polymerization or depolymerization	8	intracellular organisation - cytoskeleton	ORGANIZATION / CYTOSKELETON
0.00507	38	3127	19	0.006	0.5	GO:1902743	BP	2	regulation of lamellipodium organization	7	intracellular organisation - cytoskeleton	ORGANIZATION / CYTOSKELETON
0.0000813	43	3127	23	0.007	0.535	GO:1902017	BP	2	regulation of cilium assembly	8	intracellular organisation - cytoskeleton	ORGANIZATION / CYTOSKELETON
0.00716	13	3127	10	0.003	0.769	GO:1902855	BP	2	regulation of non-motile cilium assembly	9	intracellular organisation - cytoskeleton	ORGANIZATION / CYTOSKELETON
3.42E-08	28	3127	21	0.007	0.75	GO:0031113	BP	2	regulation of microtubule polymerization	7	intracellular organisation - cytoskeleton	ORGANIZATION / CYTOSKELETON
1.23E-15	288	3127	110	0.035	0.382	GO:0032956	BP	2	regulation of actin cytoskeleton organization	5	intracellular organisation - cytoskeleton	ORGANIZATION / CYTOSKELETON
1.75E-08	162	3127	63	0.02	0.389	GO:0030832	BP	2	regulation of actin filament length	6	intracellular organisation - cytoskeleton	ORGANIZATION / CYTOSKELETON
1.27E-08	161	3127	63	0.02	0.391	GO:0008064	BP	2	regulation of actin polymerization or depolymerization	7	intracellular organisation - cytoskeleton	ORGANIZATION / CYTOSKELETON
3.02E-09	142	3127	59	0.019	0.415	GO:0030833	BP	2	regulation of actin filament polymerization	8	intracellular organisation - cytoskeleton	ORGANIZATION / CYTOSKELETON
0.00237	82	3127	32	0.01	0.39	GO:0032231	BP	2	regulation of actin filament bundle assembly	6	intracellular organisation - cytoskeleton	ORGANIZATION / CYTOSKELETON
1.42E-14	188	3127	81	0.026	0.431	GO:0051495	BP	2	positive regulation of cytoskeleton organization	6	intracellular organisation - cytoskeleton	ORGANIZATION / CYTOSKELETON
0.00000198	20	3127	16	0.005	0.8	GO:0031112	BP	2	positive regulation of microtubule polymerization or depolymerization	7	intracellular organisation - cytoskeleton	ORGANIZATION / CYTOSKELETON
0.00000255	16	3127	14	0.004	0.875	GO:0031116	BP	2	positive regulation of microtubule polymerization	6	intracellular organisation - cytoskeleton	ORGANIZATION / CYTOSKELETON
0.00000464	90	3127	39	0.012	0.433	GO:0030838	BP	2	positive regulation of actin filament polymerization	6	intracellular organisation - cytoskeleton	ORGANIZATION / CYTOSKELETON
0.000026	117	3127	45	0.014	0.385	GO:0051494	BP	2	negative regulation of cytoskeleton organization	6	intracellular organisation - cytoskeleton	ORGANIZATION / CYTOSKELETON
1.15E-58	1323	3127	456	0.146	0.345	GO:0120036	BP	2	plasma membrane bounded cell projection organization	5	intracellular organisation - cytoskeleton - cell projections	ORGANIZATION / CYTOSKELETON
1.87E-26	503	3127	187	0.06	0.372	GO:0120031	BP	2	plasma membrane bounded cell projection assembly	6	intracellular organisation - cytoskeleton - cell projections	ORGANIZATION / CYTOSKELETON
1.38E-22	593	3127	201	0.064	0.339	GO:0120039	BP	2	plasma membrane bounded cell projection morphogenesis	6	intracellular organisation - cytoskeleton - cell projections	ORGANIZATION / CYTOSKELETON
0.00327	28	3127	16	0.005	0.571	GO:0097484	BP	2	dendrite extension	9	intracellular organisation - cytoskeleton - cell projections	ORGANIZATION / CYTOSKELETON
0.0235	102	3127	35	0.011	0.343	GO:0048675	BP	2	axon extension	9	intracellular organisation - cytoskeleton - cell projections	ORGANIZATION / CYTOSKELETON
4.45E-25	542	3127	194	0.062	0.358	GO:0120035	BP	2	regulation of plasma membrane bounded cell projection organization	6	intracellular organisation - cytoskeleton - cell projections	ORGANIZATION / CYTOSKELETON
4.29E-08	146	3127	58	0.019	0.397	GO:0120032	BP	2	regulation of plasma membrane bounded cell projection assembly	7	intracellular organisation - cytoskeleton - cell projections	ORGANIZATION / CYTOSKELETON
3.24E-58	1348	3127	461	0.147	0.342	GO:0030030	BP	2	cell projection organization	4	intracellular organisation - cytoskeleton - cell projections	ORGANIZATION / CYTOSKELETON
3.48E-27	509	3127	190	0.061	0.373	GO:0030031	BP	2	cell projection assembly	5	intracellular organisation - cytoskeleton - cell projections	ORGANIZATION / CYTOSKELETON
1.33E-22	597	3127	202	0.065	0.338	GO:0048858	BP	2	cell projection morphogenesis	5	intracellular organisation - cytoskeleton - cell projections	ORGANIZATION / CYTOSKELETON
5.77E-25	551	3127	196	0.063	0.356	GO:0031344	BP	2	regulation of cell projection organization	5	intracellular organisation - cytoskeleton - cell projections	ORGANIZATION / CYTOSKELETON
6.64E-15	321	3127	117	0.037	0.364	GO:0031346	BP	2	positive regulation of cell projection organization	5	intracellular organisation - cytoskeleton - cell projections	ORGANIZATION / CYTOSKELETON
0.00000205	147	3127	55	0.018	0.374	GO:0031345	BP	2	negative regulation of cell projection organization	5	intracellular organisation - cytoskeleton - cell projections	ORGANIZATION / CYTOSKELETON
3.62E-11	76	3127	42	0.013	0.553	GO:0090559	BP	2	regulation of membrane permeability	4	intracellular organisation - membrane	ORGANIZATION / CYTOSKELETON
3.2E-19	576	3127	189	0.06	0.328	GO:0010256	BP	2	endomembrane system organization	4	intracellular organisation - membrane	ORGANIZATION / CYTOSKELETON
2.28E-32	1064	3127	335	0.107	0.315	GO:0061024	BP	2	membrane organization	4	intracellular organisation - membrane	ORGANIZATION / CYTOSKELETON
3.15E-09	283	3127	95	0.03	0.336	GO:0007009	BP	2	plasma membrane organization	6	intracellular organisation - membrane	ORGANIZATION / CYTOSKELETON
0.00000128	80	3127	37	0.012	0.463	GO:1903729	BP	2	regulation of plasma membrane organization	5	intracellular organisation - membrane	ORGANIZATION / CYTOSKELETON
9.98E-33	499	3127	198	0.063	0.397	GO:0051640	BP	2	organelle localization	4	intracellular organisation - organelle	ORGANIZATION / CYTOSKELETON
1.52E-139	3599	3127	1138	0.364	0.316	GO:0006996	BP	2	organelle organization	4	intracellular organisation - organelle	ORGANIZATION / CYTOSKELETON
3.7E-15	424	3127	143	0.046	0.337	GO:0048285	BP	2	organelle fission	5	intracellular organisation - organelle	ORGANIZATION / CYTOSKELETON
0.000351	214	3127	66	0.021	0.308	GO:0048284	BP	2	organelle fusion	5	intracellular organisation - organelle	ORGANIZATION / CYTOSKELETON
2.98E-31	715	3127	250	0.08	0.35	GO:0070925	BP	2	organelle assembly	5	intracellular organisation - organelle	ORGANIZATION / CYTOSKELETON
4.36E-79	1152	3127	453	0.145	0.393	GO:0033043	BP	2	regulation of organelle organization	5	intracellular organisation - organelle	ORGANIZATION / CYTOSKELETON
1.28E-56	603	3127	267	0.085	0.443	GO:0010638	BP	2	positive regulation of organelle organization	5	intracellular organisation - organelle	ORGANIZATION / CYTOSKELETON
8.61E-18	314	3127	121	0.039	0.385	GO:0010639	BP	2	negative regulation of organelle organization	5	intracellular organisation - organelle	ORGANIZATION / CYTOSKELETON
0.000000927	100	3127	43	0.014	0.43	GO:1903008	BP	2	organelle disassembly	6	intracellular organisation - organelle	ORGANIZATION / CYTOSKELETON
4.29E-11	145	3127	63	0.02	0.434	GO:1902115	BP	2	regulation of organelle assembly	6	intracellular organisation - organelle	ORGANIZATION / CYTOSKELETON
0.0043	58	3127	25	0.008	0.431	GO:1902117	BP	2	positive regulation of organelle assembly	4	intracellular organisation - organelle	ORGANIZATION / CYTOSKELETON
0.00287	102	3127	37	0.012	0.363	GO:0007030	BP	2	Golgi organization	5	intracellular organisation - organelle - golgi	ORGANIZATION / CYTOSKELETON
0.00182	19	3127	13	0.004	0.684	GO:0098780	BP	2	response to mitochondrial depolarisation	5	intracellular organisation - organelle - mitochondria	ORGANIZATION / CYTOSKELETON
0.0358	64	3127	25	0.008	0.391	GO:0051881	BP	12	regulation of mitochondrial membrane potential	1	intracellular organisation - organelle - mitochondria	ORGANIZATION / CYTOSKELETON
0.0000441	39	3127	22	0.007	0.564	GO:0051646	BP	2	mitochondrion localization	5	intracellular organisation - organelle - mitochondria	ORGANIZATION / CYTOSKELETON
0.0176	19	3127	12	0.004	0.632	GO:0051654	BP	2	establishment of mitochondrion localization	5	intracellular organisation - organelle - mitochondria	ORGANIZATION / CYTOSKELETON
9.96E-16	532	3127	170	0.054	0.32	GO:0007005	BP	2	mitochondrion organization	5	intracellular organisation - organelle - mitochondria	ORGANIZATION / CYTOSKELETON
0.000000817	79	3127	37	0.012	0.468	GO:0061726	BP	2	mitochondrion disassembly	6	intracellular organisation - organelle - mitochondria	ORGANIZATION / CYTOSKELETON
1.96E-11	106	3127	52	0.017	0.491	GO:0007006	BP	2	mitochondrial membrane organization	6	intracellular organisation - organelle - mitochondria	ORGANIZATION / CYTOSKELETON
4.15E-10	71	3127	39	0.012	0.549	GO:0046902	BP	2	regulation of mitochondrial membrane permeability	7	intracellular organisation - organelle - mitochondria	ORGANIZATION / CYTOSKELETON
8.22E-09	58	3127	33	0.011	0.569	GO:0035794	BP	2	positive regulation of mitochondrial membrane permeability	8	intracellular organisation - organelle - mitochondria	ORGANIZATION / CYTOSKELETON
6.75E-14	225	3127	90	0.029	0.4	GO:0010821	BP	2	regulation of mitochondrion organization	6	intracellular organisation - organelle - mitochondria	ORGANIZATION / CYTOSKELETON
5.25E-08	55	3127	31	0.01	0.564	GO:0097345	BP	2	mitochondrial outer membrane permeabilization	6	intracellular organisation - organelle - mitochondria	ORGANIZATION / CYTOSKELETON
4.7E-11	174	3127	71	0.023	0.408	GO:0010822	BP	2	positive regulation of mitochondrion organization	6	intracellular organisation - organelle - mitochondria	ORGANIZATION / CYTOSKELETON
0.00613	142	3127	46	0.015	0.324	GO:0006997	BP	2	nucleus organization	5	intracellular organisation - organelle - nucleus	ORGANIZATION / CYTOSKELETON
0.0417	84	3127	30	0.01	0.357	GO:0006998	BP	2	nuclear envelope organization	6	intracellular organisation - organelle - nucleus	ORGANIZATION / CYTOSKELETON
0.00033	146	3127	50	0.016	0.342	GO:0051028	BP	2	mRNA transport	9	intracellular organisation - RNA	ORGANIZATION / CYTOSKELETON
0.00000361	193	3127	66	0.021	0.342	GO:0051236	BP	2	establishment of RNA localization	4	intracellular organisation - RNA	ORGANIZATION / CYTOSKELETON
2.13E-76	6175	3127	1481	0.474	0.24	GO:0051179	BP	2	localization	2	protein metabolism - localisation	REMOVE
3.57E-84	2864	3127	860	0.275	0.3	GO:0033036	BP	2	macromolecule localization	3	protein metabolism - localisation	REMOVE
2.14E-94	2563	3127	818	0.262	0.319	GO:0008104	BP	2	protein localization	4	protein metabolism - localisation	REMOVE
0.0000371	122	3127	46	0.015	0.377	GO:0031503	BP	2	protein complex localization	5	protein metabolism - localisation	REMOVE
2.04E-25	1407	3127	391	0.125	0.278	GO:0051674	BP	2	localization of cell	3	protein metabolism - localisation	REMOVE
1e-57	5124	3127	1230	0.393	0.24	GO:0051234	BP	2	establishment of localization	3	protein metabolism - localisation	REMOVE
1.29E-71	2114	3127	667	0.213	0.316	GO:0045184	BP	2	establishment of protein localization	4	protein metabolism - localisation	REMOVE
2.78E-92	1748	3127	626	0.2	0.358	GO:0070727	BP	2	cellular macromolecule localization	4	protein metabolism - localisation	REMOVE
4.21E-92	1737	3127	623	0.199	0.359	GO:0034613	BP	2	cellular protein localization	5	protein metabolism - localisation	REMOVE
1.51E-63	905	3127	361	0.115	0.399	GO:0033365	BP	2	protein localization to organelle	6	protein metabolism - localisation	REMOVE
3.02E-46	655	3127	264	0.084	0.403	GO:0072594	BP	2	establishment of protein localization to organelle	7	protein metabolism - localisation	REMOVE
0.000000576	239	3127	79	0.025	0.331	GO:1990778	BP	2	protein localization to cell periphery	6	protein metabolism - localisation	REMOVE
7.76E-30	429	3127	174	0.056	0.406	GO:0051656	BP	2	establishment of organelle localization	5	protein metabolism - localisation	REMOVE
5.75E-86	2154	3127	708	0.226	0.329	GO:0051649	BP	2	establishment of localization in cell	4	protein metabolism - localisation	REMOVE
0.000000862	292	3127	91	0.029	0.312	GO:0051235	BP	2	maintenance of location	4	protein metabolism - localisation	REMOVE
0.011	95	3127	34	0.011	0.358	GO:0045185	BP	2	maintenance of protein location	5	protein metabolism - localisation	REMOVE
2.37E-51	2456	3127	689	0.22	0.281	GO:0032879	BP	2	regulation of localization	3	protein metabolism - localisation	REMOVE
6.4E-54	853	3127	330	0.106	0.387	GO:0060341	BP	2	regulation of cellular localization	4	protein metabolism - localisation	REMOVE
7.89E-49	959	3127	347	0.111	0.362	GO:0032880	BP	2	regulation of protein localization	4	protein metabolism - localisation	REMOVE
2.01E-39	811	3127	291	0.093	0.359	GO:0070201	BP	2	regulation of establishment of protein localization	5	protein metabolism - localisation	REMOVE
2.5E-47	571	3127	243	0.078	0.426	GO:1903827	BP	2	regulation of cellular protein localization	5	protein metabolism - localisation	REMOVE
0.000255	72	3127	31	0.01	0.431	GO:1904375	BP	2	regulation of protein localization to cell periphery	6	protein metabolism - localisation	REMOVE
2.36E-15	294	3127	111	0.035	0.378	GO:1903533	BP	2	regulation of protein targeting	7	protein metabolism - localisation	REMOVE
6.78E-24	508	3127	183	0.059	0.36	GO:1904951	BP	2	positive regulation of establishment of protein localization	3	protein metabolism - localisation	REMOVE
2.18E-30	371	3127	159	0.051	0.429	GO:1903829	BP	2	positive regulation of cellular protein localization	3	protein metabolism - localisation	REMOVE
0.0024	43	3127	21	0.007	0.488	GO:1904377	BP	2	positive regulation of protein localization to cell periphery	4	protein metabolism - localisation	REMOVE
0.000000759	203	3127	70	0.022	0.345	GO:1904950	BP	2	negative regulation of establishment of protein localization	3	protein metabolism - localisation	REMOVE
0.000000001	139	3127	59	0.019	0.424	GO:1903828	BP	2	negative regulation of cellular protein localization	3	protein metabolism - localisation	REMOVE
5e-38	687	3127	257	0.082	0.374	GO:0006605	BP	2	protein targeting	6	protein metabolism - localisation	REMOVE
8.29E-21	319	3127	128	0.041	0.401	GO:0017038	BP	2	protein import	5	protein metabolism - localisation	REMOVE
0.0000272	482	3127	128	0.041	0.266	GO:0009306	BP	2	protein secretion	5	protein metabolism - localisation	REMOVE
0.000629	23	3127	15	0.005	0.652	GO:1905508	BP	2	protein localization to microtubule organizing center	9	protein metabolism - localisation - cytosckeleton	REMOVE
0.00000306	38	3127	23	0.007	0.605	GO:0044380	BP	2	protein localization to cytoskeleton	7	protein metabolism - localisation - cytoskeleton	REMOVE
0.00000969	34	3127	21	0.007	0.618	GO:0072698	BP	2	protein localization to microtubule cytoskeleton	8	protein metabolism - localisation - cytoskeleton	REMOVE
2.1E-10	128	3127	57	0.018	0.445	GO:0070972	BP	2	protein localization to endoplasmic reticulum	7	protein metabolism - localisation - ER	REMOVE
3.21E-11	107	3127	52	0.017	0.486	GO:0072599	BP	2	establishment of protein localization to endoplasmic reticulum	8	protein metabolism - localisation - ER	REMOVE
1.1E-10	103	3127	50	0.016	0.485	GO:0045047	BP	2	protein targeting to ER	7	protein metabolism - localisation - ER	REMOVE
1.35E-13	145	3127	67	0.021	0.462	GO:1905475	BP	2	regulation of protein localization to membrane	6	protein metabolism - localisation - membrane	REMOVE
1.32E-14	105	3127	56	0.018	0.533	GO:1905477	BP	2	positive regulation of protein localization to membrane	4	protein metabolism - localisation - membrane	REMOVE
9.38E-31	513	3127	198	0.063	0.386	GO:0072657	BP	2	protein localization to membrane	6	protein metabolism - localisation - membrane	REMOVE
2.26E-26	378	3127	154	0.049	0.407	GO:0090150	BP	2	establishment of protein localization to membrane	7	protein metabolism - localisation - membrane	REMOVE
8.14E-12	191	3127	77	0.025	0.403	GO:0006612	BP	2	protein targeting to membrane	7	protein metabolism - localisation - membrane	REMOVE
2.44E-11	100	3127	50	0.016	0.5	GO:0006613	BP	2	cotranslational protein targeting to membrane	8	protein metabolism - localisation - membrane	REMOVE
9.22E-13	94	3127	50	0.016	0.532	GO:0006614	BP	2	SRP-dependent cotranslational protein targeting to membrane	8	protein metabolism - localisation - membrane	REMOVE
0.0000363	220	3127	70	0.022	0.318	GO:0072659	BP	2	protein localization to plasma membrane	7	protein metabolism - localisation - membrane	REMOVE
0.000000611	50	3127	28	0.009	0.56	GO:0051205	BP	2	protein insertion into membrane	6	protein metabolism - localisation - membrane	REMOVE
0.000000275	35	3127	23	0.007	0.657	GO:0051204	BP	2	protein insertion into mitochondrial membrane	7	protein metabolism - localisation - membrane	REMOVE
0.000464	70	3127	30	0.01	0.429	GO:1903076	BP	2	regulation of protein localization to plasma membrane	6	protein metabolism - localisation - membrane	REMOVE
0.00722	42	3127	20	0.006	0.476	GO:1903078	BP	2	positive regulation of protein localization to plasma membrane	5	protein metabolism - localisation - membrane	REMOVE
0.000000361	192	3127	68	0.022	0.354	GO:0070585	BP	2	protein localization to mitochondrion	7	protein metabolism - localisation - mitochondria	REMOVE
0.00000061	190	3127	67	0.021	0.353	GO:0072655	BP	2	establishment of protein localization to mitochondrion	8	protein metabolism - localisation - mitochondria	REMOVE
0.00000948	129	3127	49	0.016	0.38	GO:1903747	BP	2	regulation of establishment of protein localization to mitochondrion	6	protein metabolism - localisation - mitochondria	REMOVE
0.000585	116	3127	42	0.013	0.362	GO:1903749	BP	2	positive regulation of establishment of protein localization to mitochondrion	4	protein metabolism - localisation - mitochondria	REMOVE
0.000247	9	3127	9	0.003	1	GO:1990173	BP	2	protein localization to nucleoplasm	8	protein metabolism - localisation - nucleus	REMOVE
0.000247	9	3127	9	0.003	1	GO:1903405	BP	2	protein localization to nuclear body	9	protein metabolism - localisation - nucleus	REMOVE
0.000247	9	3127	9	0.003	1	GO:1904867	BP	2	protein localization to Cajal body	10	protein metabolism - localisation - nucleus	REMOVE
0.0397	23	3127	13	0.004	0.565	GO:0070199	BP	2	establishment of protein localization to chromosome	8	protein metabolism - localisation - nucleus	REMOVE
0.0000136	15	3127	13	0.004	0.867	GO:0070200	BP	2	establishment of protein localization to telomere	9	protein metabolism - localisation - nucleus	REMOVE
0.00038	11	3127	10	0.003	0.909	GO:0070202	BP	2	regulation of establishment of protein localization to chromosome	6	protein metabolism - localisation - nucleus	REMOVE
0.000247	9	3127	9	0.003	1	GO:1904851	BP	2	positive regulation of establishment of protein localization to telomere	5	protein metabolism - localisation - nucleus	REMOVE
2.58E-29	356	3127	153	0.049	0.43	GO:0034504	BP	2	protein localization to nucleus	7	protein metabolism - localisation - nucleus	REMOVE
0.000629	23	3127	15	0.005	0.652	GO:0071539	BP	2	protein localization to centrosome	10	protein metabolism - localisation - nucleus	REMOVE
0.00318	68	3127	28	0.009	0.412	GO:0034502	BP	2	protein localization to chromosome	7	protein metabolism - localisation - nucleus	REMOVE
0.0000903	26	3127	17	0.005	0.654	GO:0070198	BP	2	protein localization to chromosome, telomeric region	8	protein metabolism - localisation - nucleus	REMOVE
4.73E-20	269	3127	113	0.036	0.42	GO:0044744	BP	2	protein targeting to nucleus	7	protein metabolism - localisation - nucleus	REMOVE
3.19E-24	212	3127	103	0.033	0.486	GO:1900180	BP	2	regulation of protein localization to nucleus	6	protein metabolism - localisation - nucleus	REMOVE
0.0015	8	3127	8	0.003	1	GO:1904869	BP	2	regulation of protein localization to Cajal body	7	protein metabolism - localisation - nucleus	REMOVE
0.0000406	10	3127	10	0.003	1	GO:0070203	BP	2	regulation of establishment of protein localization to telomere	7	protein metabolism - localisation - nucleus	REMOVE
2.54E-14	125	3127	62	0.02	0.496	GO:1900182	BP	2	positive regulation of protein localization to nucleus	4	protein metabolism - localisation - nucleus	REMOVE
0.0015	8	3127	8	0.003	1	GO:1904871	BP	2	positive regulation of protein localization to Cajal body	5	protein metabolism - localisation - nucleus	REMOVE
0.00987	11	3127	9	0.003	0.818	GO:1904816	BP	2	positive regulation of protein localization to chromosome, telomeric region	4	protein metabolism - localisation - nucleus	REMOVE
0.0000343	74	3127	33	0.011	0.446	GO:1900181	BP	2	negative regulation of protein localization to nucleus	4	protein metabolism - localisation - nucleus	REMOVE
2.7E-21	1759	3127	450	0.144	0.256	GO:0006508	BP	2	proteolysis	6	protein metabolism	REMOVE
1.41E-18	180	3127	85	0.027	0.472	GO:0043393	BP	2	regulation of protein binding	5	protein metabolism	REMOVE
7.22E-17	224	3127	95	0.03	0.424	GO:0006457	BP	2	protein folding	3	protein metabolism - folding	REMOVE
9.52E-11	22	3127	20	0.006	0.909	GO:0042026	BP	2	protein refolding	4	protein metabolism - folding	REMOVE
0.000136	32	3127	19	0.006	0.594	GO:0006458	BP	2	de novo' protein folding	4	protein metabolism - folding	REMOVE
6.21E-12	62	3127	38	0.012	0.613	GO:0061077	BP	2	chaperone-mediated protein folding	4	protein metabolism - folding	REMOVE
0.0056	35	3127	18	0.006	0.514	GO:0050732	BP	2	negative regulation of peptidyl-tyrosine phosphorylation	8	protein metabolism - modification	REMOVE
1.23E-107	3864	3127	1124	0.359	0.291	GO:0036211	BP	2	protein modification process	6	protein metabolism - modification	REMOVE
1.23E-107	3864	3127	1124	0.359	0.291	GO:0006464	BP	2	cellular protein modification process	6	protein metabolism - modification	REMOVE
9.09E-36	1110	3127	354	0.113	0.319	GO:0070647	BP	2	protein modification by small protein conjugation or removal	7	protein metabolism - modification	REMOVE
1.44E-24	902	3127	278	0.089	0.308	GO:0032446	BP	2	protein modification by small protein conjugation	8	protein metabolism - modification	REMOVE
1.42E-23	312	3127	131	0.042	0.42	GO:0070646	BP	2	protein modification by small protein removal	8	protein metabolism - modification	REMOVE
8.56E-79	1154	3127	453	0.145	0.393	GO:0018193	BP	2	peptidyl-amino acid modification	7	protein metabolism - modification	REMOVE
1e-38	327	3127	159	0.051	0.486	GO:0018212	BP	2	peptidyl-tyrosine modification	8	protein metabolism - modification	REMOVE
9.69E-22	112	3127	67	0.021	0.598	GO:0018210	BP	2	peptidyl-threonine modification	8	protein metabolism - modification	REMOVE
8.36E-36	282	3127	141	0.045	0.5	GO:0018209	BP	2	peptidyl-serine modification	8	protein metabolism - modification	REMOVE
1.37E-09	368	3127	116	0.037	0.315	GO:0018205	BP	2	peptidyl-lysine modification	8	protein metabolism - modification	REMOVE
2.47E-27	575	3127	207	0.066	0.36	GO:0019941	BP	2	modification-dependent protein catabolic process	8	protein metabolism - modification	REMOVE
0.00000107	464	3127	129	0.041	0.278	GO:0051259	BP	2	protein oligomerization	7	protein metabolism - modification	REMOVE
1.38E-20	234	3127	104	0.033	0.444	GO:0051258	BP	2	protein polymerization	8	protein metabolism - modification	REMOVE
0.0122	72	3127	28	0.009	0.389	GO:1901879	BP	2	regulation of protein depolymerization	6	protein metabolism - modification	REMOVE
1.84E-100	1616	3127	609	0.195	0.377	GO:0031399	BP	2	regulation of protein modification process	6	protein metabolism - modification	REMOVE
5.96E-29	275	3127	129	0.041	0.469	GO:1903320	BP	2	regulation of protein modification by small protein conjugation or removal	7	protein metabolism - modification	REMOVE
1.99E-65	1097	3127	414	0.132	0.377	GO:0031401	BP	2	positive regulation of protein modification process	6	protein metabolism - modification	REMOVE
1.82E-18	194	3127	89	0.028	0.459	GO:1903322	BP	2	positive regulation of protein modification by small protein conjugation or removal	7	protein metabolism - modification	REMOVE
0.013	61	3127	25	0.008	0.41	GO:0032272	BP	2	negative regulation of protein polymerization	6	protein metabolism - modification	REMOVE
4.23E-45	581	3127	242	0.077	0.417	GO:0031400	BP	2	negative regulation of protein modification process	6	protein metabolism - modification	REMOVE
2e-12	141	3127	64	0.02	0.454	GO:1903321	BP	2	negative regulation of protein modification by small protein conjugation or removal	7	protein metabolism - modification	REMOVE
0.000554	212	3127	65	0.021	0.307	GO:0043543	BP	2	protein acylation	7	protein metabolism - modification - acetylation	REMOVE
0.000472	181	3127	58	0.019	0.32	GO:0006473	BP	2	protein acetylation	8	protein metabolism - modification - acetylation	REMOVE
0.0186	156	3127	48	0.015	0.308	GO:0006475	BP	2	internal protein amino acid acetylation	9	protein metabolism - modification - acetylation	REMOVE
0.000000769	96	3127	42	0.013	0.438	GO:0035601	BP	2	protein deacylation	7	protein metabolism - modification - acetylation	REMOVE
0.000000411	91	3127	41	0.013	0.451	GO:0006476	BP	2	protein deacetylation	8	protein metabolism - modification - acetylation	REMOVE
0.0186	156	3127	48	0.015	0.308	GO:0018394	BP	2	peptidyl-lysine acetylation	9	protein metabolism - modification - acetylation	REMOVE
0.0383	151	3127	46	0.015	0.305	GO:0018393	BP	2	internal peptidyl-lysine acetylation	10	protein metabolism - modification - acetylation	REMOVE
0.00235	60	3127	26	0.008	0.433	GO:1901983	BP	2	regulation of protein acetylation	7	protein metabolism - modification - acetylation	REMOVE
0.0376	53	3127	22	0.007	0.415	GO:2000756	BP	2	regulation of peptidyl-lysine acetylation	8	protein metabolism - modification - acetylation	REMOVE
0.000963	35	3127	19	0.006	0.543	GO:0090311	BP	2	regulation of protein deacetylation	7	protein metabolism - modification - acetylation	REMOVE
0.0332	32	3127	16	0.005	0.5	GO:1901985	BP	2	positive regulation of protein acetylation	7	protein metabolism - modification - acetylation	REMOVE
1.06E-09	254	3127	89	0.028	0.35	GO:0006470	BP	2	protein dephosphorylation	7	protein metabolism - modification - phosphorylation	REMOVE
4.92E-129	1824	3127	711	0.227	0.39	GO:0006468	BP	2	protein phosphorylation	7	protein metabolism - modification - phosphorylation	REMOVE
2.1E-46	233	3127	138	0.044	0.592	GO:0046777	BP	2	protein autophosphorylation	8	protein metabolism - modification - phosphorylation	REMOVE
4.66E-23	108	3127	67	0.021	0.62	GO:0018107	BP	2	peptidyl-threonine phosphorylation	8	protein metabolism - modification - phosphorylation	REMOVE
3.72E-39	325	3127	159	0.051	0.489	GO:0018108	BP	2	peptidyl-tyrosine phosphorylation	8	protein metabolism - modification - phosphorylation	REMOVE
3.62E-22	52	3127	43	0.014	0.827	GO:0038083	BP	2	peptidyl-tyrosine autophosphorylation	9	protein metabolism - modification - phosphorylation	REMOVE
7.26E-36	269	3127	137	0.044	0.509	GO:0018105	BP	2	peptidyl-serine phosphorylation	8	protein metabolism - modification - phosphorylation	REMOVE
0.00401	65	3127	27	0.009	0.415	GO:0035304	BP	2	regulation of protein dephosphorylation	7	protein metabolism - modification - phosphorylation	REMOVE
8.37E-81	1249	3127	481	0.154	0.385	GO:0001932	BP	2	regulation of protein phosphorylation	7	protein metabolism - modification - phosphorylation	REMOVE
0.00271	40	3127	20	0.006	0.5	GO:0010799	BP	2	regulation of peptidyl-threonine phosphorylation	8	protein metabolism - modification - phosphorylation	REMOVE
9.65E-08	119	3127	50	0.016	0.42	GO:0033135	BP	2	regulation of peptidyl-serine phosphorylation	8	protein metabolism - modification - phosphorylation	REMOVE
6.24E-13	173	3127	74	0.024	0.428	GO:0050730	BP	2	regulation of peptidyl-tyrosine phosphorylation	8	protein metabolism - modification - phosphorylation	REMOVE
1.13E-51	846	3127	324	0.104	0.383	GO:0001934	BP	2	positive regulation of protein phosphorylation	7	protein metabolism - modification - phosphorylation	REMOVE
0.00017	89	3127	36	0.012	0.404	GO:0033138	BP	2	positive regulation of peptidyl-serine phosphorylation	8	protein metabolism - modification - phosphorylation	REMOVE
0.000000284	122	3127	50	0.016	0.41	GO:0050731	BP	2	positive regulation of peptidyl-tyrosine phosphorylation	8	protein metabolism - modification - phosphorylation	REMOVE
2.28E-33	389	3127	169	0.054	0.434	GO:0001933	BP	2	negative regulation of protein phosphorylation	7	protein metabolism - modification - phosphorylation	REMOVE
0.000333	91	3127	36	0.012	0.396	GO:0016925	BP	2	protein sumoylation	9	protein metabolism - modification - SUMOylation	REMOVE
5.26E-48	1330	3127	434	0.139	0.326	GO:0070271	BP	2	protein complex biogenesis	4	protein metabolism - protein complex organisation	REMOVE
4.29E-64	1942	3127	611	0.195	0.315	GO:0043933	BP	2	macromolecular complex subunit organization	4	protein metabolism - protein complex organisation	REMOVE
3.49E-51	1537	3127	489	0.156	0.318	GO:0071822	BP	2	protein complex subunit organization	5	protein metabolism - protein complex organisation	REMOVE
1.85E-10	216	3127	81	0.026	0.375	GO:0071826	BP	2	ribonucleoprotein complex subunit organization	5	protein metabolism - protein complex organisation	REMOVE
0.0265	258	3127	70	0.022	0.271	GO:0071824	BP	2	protein-DNA complex subunit organization	5	protein metabolism - protein complex organisation	REMOVE
2.79E-09	266	3127	91	0.029	0.342	GO:0032984	BP	2	macromolecular complex disassembly	5	protein metabolism - protein complex organisation	REMOVE
0.000118	200	3127	64	0.02	0.32	GO:0043624	BP	2	cellular protein complex disassembly	7	protein metabolism - protein complex organisation	REMOVE
8.24E-62	1687	3127	548	0.175	0.325	GO:0065003	BP	2	macromolecular complex assembly	5	protein metabolism - protein complex organisation	REMOVE
6.1E-32	999	3127	319	0.102	0.319	GO:0034622	BP	2	cellular macromolecular complex assembly	6	protein metabolism - protein complex organisation	REMOVE
3.06E-16	578	3127	182	0.058	0.315	GO:0043623	BP	2	cellular protein complex assembly	7	protein metabolism - protein complex organisation	REMOVE
0.00803	86	3127	32	0.01	0.372	GO:0043244	BP	2	regulation of protein complex disassembly	5	protein metabolism - protein complex organisation	REMOVE
0.000000289	236	3127	79	0.025	0.335	GO:0043241	BP	2	protein complex disassembly	6	protein metabolism - protein complex organisation	REMOVE
4.18E-48	1329	3127	434	0.139	0.327	GO:0006461	BP	2	protein complex assembly	6	protein metabolism - protein complex organisation	REMOVE
1.4E-38	371	3127	172	0.055	0.464	GO:0043254	BP	2	regulation of protein complex assembly	5	protein metabolism - protein complex organisation	REMOVE
8.12E-25	219	3127	106	0.034	0.484	GO:0031334	BP	2	positive regulation of protein complex assembly	4	protein metabolism - protein complex organisation	REMOVE
2.06E-28	222	3127	112	0.036	0.505	GO:0031647	BP	2	regulation of protein stability	4	protein metabolism - protein stability	REMOVE
2.36E-19	132	3127	71	0.023	0.538	GO:0050821	BP	2	protein stabilization	5	protein metabolism - protein stability	REMOVE
0.00172	36	3127	19	0.006	0.528	GO:0031648	BP	2	protein destabilization	5	protein metabolism - protein stability	REMOVE
0.0204	22	3127	13	0.004	0.591	GO:0042987	BP	2	amyloid precursor protein catabolic process	7	protein modification	REMOVE
0.000247	9	3127	9	0.003	1	GO:1990000	BP	2	amyloid fibril formation	5	protein modification	REMOVE
0.00507	38	3127	19	0.006	0.5	GO:0032459	BP	2	regulation of protein oligomerization	6	protein modification	REMOVE
0.0165	58	3127	24	0.008	0.414	GO:1901880	BP	2	negative regulation of protein depolymerization	6	protein modification	REMOVE
0.0176	19	3127	12	0.004	0.632	GO:0032462	BP	2	regulation of protein homooligomerization	1	protein modification	REMOVE
0.0493	10	3127	8	0.003	0.8	GO:0032463	BP	2	negative regulation of protein homooligomerization	2	protein modification	REMOVE
0.0397	23	3127	13	0.004	0.565	GO:0061099	BP	2	negative regulation of protein tyrosine kinase activity	9	enzyme	REMOVE
0.00282	98	3127	36	0.012	0.367	GO:0046854	BP	2	phosphatidylinositol phosphorylation	1	enzyme	REMOVE
0.00000168	98	3127	42	0.013	0.429	GO:0098732	BP	2	macromolecule deacylation	6	enzyme	REMOVE
3.3E-87	2373	3127	760	0.243	0.32	GO:0050790	BP	2	regulation of catalytic activity	4	enzyme	REMOVE
7.37E-79	946	3127	398	0.127	0.421	GO:0051338	BP	2	regulation of transferase activity	5	enzyme	REMOVE
1.63E-36	1349	3127	410	0.131	0.304	GO:0051336	BP	2	regulation of hydrolase activity	5	enzyme	REMOVE
2.2E-24	834	3127	262	0.084	0.314	GO:0043086	BP	2	negative regulation of catalytic activity	5	enzyme	REMOVE
1.62E-30	349	3127	153	0.049	0.438	GO:0051348	BP	2	negative regulation of transferase activity	6	enzyme	REMOVE
3.44E-71	1582	3127	544	0.174	0.344	GO:0043085	BP	2	positive regulation of catalytic activity	5	enzyme	REMOVE
7.09E-35	939	3127	312	0.1	0.332	GO:0051345	BP	2	positive regulation of hydrolase activity	6	enzyme	REMOVE
6.8E-57	644	3127	279	0.089	0.433	GO:0051347	BP	2	positive regulation of transferase activity	6	enzyme	REMOVE
0.0147	282	3127	76	0.024	0.27	GO:0090305	BP	2	nucleic acid phosphodiester bond hydrolysis	7	enzyme	REMOVE
0.00000318	25	3127	18	0.006	0.72	GO:0032069	BP	2	regulation of nuclease activity	6	enzyme	REMOVE
0.0115	9	3127	8	0.003	0.889	GO:0032070	BP	2	regulation of deoxyribonuclease activity	7	enzyme	REMOVE
0.000305	15	3127	12	0.004	0.8	GO:0032075	BP	2	positive regulation of nuclease activity	6	enzyme	REMOVE
0.0176	19	3127	12	0.004	0.632	GO:0090312	BP	2	positive regulation of protein deacetylation	7	enzyme	REMOVE
0.0328	42	3127	19	0.006	0.452	GO:0032781	BP	2	positive regulation of ATPase activity	7	enzyme - ATPase	REMOVE
3.67E-16	711	3127	212	0.068	0.298	GO:0043087	BP	2	regulation of GTPase activity	6	enzyme - GTPase	REMOVE
3.07E-14	655	3127	194	0.062	0.296	GO:0043547	BP	2	positive regulation of GTPase activity	7	enzyme - GTPase	REMOVE
5.69E-127	2219	3127	804	0.257	0.362	GO:0016310	BP	2	phosphorylation	6	enzyme - kinase	REMOVE
8.33E-87	1344	3127	516	0.165	0.384	GO:0042325	BP	2	regulation of phosphorylation	7	enzyme - kinase	REMOVE
6.05E-66	782	3127	332	0.106	0.425	GO:0043549	BP	2	regulation of kinase activity	8	enzyme - kinase	REMOVE
1.15E-61	724	3127	309	0.099	0.427	GO:0045859	BP	2	regulation of protein kinase activity	8	enzyme - kinase	REMOVE
1.1E-47	467	3127	214	0.068	0.458	GO:0071900	BP	2	regulation of protein serine/threonine kinase activity	9	enzyme - kinase	REMOVE
0.00000801	64	3127	31	0.01	0.484	GO:0061097	BP	2	regulation of protein tyrosine kinase activity	9	enzyme - kinase	REMOVE
4.77E-56	888	3127	343	0.11	0.386	GO:0042327	BP	2	positive regulation of phosphorylation	7	enzyme - kinase	REMOVE
3.69E-46	503	3127	222	0.071	0.441	GO:0033674	BP	2	positive regulation of kinase activity	8	enzyme - kinase	REMOVE
1.08E-40	467	3127	203	0.065	0.435	GO:0045860	BP	2	positive regulation of protein kinase activity	8	enzyme - kinase	REMOVE
6.32E-29	330	3127	145	0.046	0.439	GO:0071902	BP	2	positive regulation of protein serine/threonine kinase activity	9	enzyme - kinase	REMOVE
1.72E-33	424	3127	179	0.057	0.422	GO:0042326	BP	2	negative regulation of phosphorylation	7	enzyme - kinase	REMOVE
6.2E-21	253	3127	110	0.035	0.435	GO:0033673	BP	2	negative regulation of kinase activity	8	enzyme - kinase	REMOVE
4.68E-20	237	3127	104	0.033	0.439	GO:0006469	BP	2	negative regulation of protein kinase activity	8	enzyme - kinase	REMOVE
7.77E-14	124	3127	61	0.02	0.492	GO:0071901	BP	2	negative regulation of protein serine/threonine kinase activity	9	enzyme - kinase	REMOVE
0.00000208	52	3127	28	0.009	0.538	GO:0043550	BP	2	regulation of lipid kinase activity	2	enzyme - kinase	REMOVE
0.00000111	34	3127	22	0.007	0.647	GO:0090218	BP	2	positive regulation of lipid kinase activity	3	enzyme - kinase	REMOVE
0.0000326	88	3127	37	0.012	0.42	GO:0006165	BP	2	nucleoside diphosphate phosphorylation	2	enzyme - kinase	REMOVE
0.000000257	43	3127	26	0.008	0.605	GO:0043551	BP	2	regulation of phosphatidylinositol 3-kinase activity	2	enzyme - kinase	REMOVE
6.77E-08	31	3127	22	0.007	0.71	GO:0043552	BP	2	positive regulation of phosphatidylinositol 3-kinase activity	3	enzyme - kinase	REMOVE
0.0234	59	3127	24	0.008	0.407	GO:0010517	BP	7	regulation of phospholipase activity	1	enzyme - lipase	REMOVE
4.94E-08	391	3127	117	0.037	0.299	GO:0052547	BP	2	regulation of peptidase activity	7	enzyme - peptidase	REMOVE
0.000000095	368	3127	111	0.035	0.302	GO:0052548	BP	2	regulation of endopeptidase activity	8	enzyme - peptidase	REMOVE
3.13E-18	209	3127	93	0.03	0.445	GO:2000116	BP	2	regulation of cysteine-type endopeptidase activity	9	enzyme - peptidase	REMOVE
0.00134	84	3127	33	0.011	0.393	GO:2000117	BP	2	negative regulation of cysteine-type endopeptidase activity	10	enzyme - peptidase	REMOVE
6.38E-15	155	3127	72	0.023	0.465	GO:0010952	BP	2	positive regulation of peptidase activity	7	enzyme - peptidase	REMOVE
6.4E-14	140	3127	66	0.021	0.471	GO:0010950	BP	2	positive regulation of endopeptidase activity	8	enzyme - peptidase	REMOVE
3.36E-13	127	3127	61	0.02	0.48	GO:2001056	BP	2	positive regulation of cysteine-type endopeptidase activity	9	enzyme - peptidase	REMOVE
0.000000465	422	3127	121	0.039	0.287	GO:0016311	BP	2	dephosphorylation	6	enzyme - phosphatase	REMOVE
0.00314	139	3127	46	0.015	0.331	GO:0035303	BP	2	regulation of dephosphorylation	7	enzyme - phosphatase	REMOVE
0.0179	130	3127	42	0.013	0.323	GO:0051828	BP	2	entry into other organism involved in symbiotic interaction	5	general	REMOVE
0.0179	130	3127	42	0.013	0.323	GO:0044409	BP	2	entry into host	6	general	REMOVE
0.0179	130	3127	42	0.013	0.323	GO:0051806	BP	2	entry into cell of other organism involved in symbiotic interaction	6	general	REMOVE
0.0179	130	3127	42	0.013	0.323	GO:0030260	BP	2	entry into host cell	7	general	REMOVE
1.57E-08	59	3127	33	0.011	0.559	GO:1905710	BP	2	positive regulation of membrane permeability	5	general	REMOVE
0.0341	195	3127	56	0.018	0.287	GO:0071229	BP	2	cellular response to acid chemical	5	general	REMOVE
0.00177	30	3127	17	0.005	0.567	GO:1902116	BP	2	negative regulation of organelle assembly	6	general	REMOVE
0.046	61	3127	24	0.008	0.393	GO:0043242	BP	2	negative regulation of protein complex disassembly	5	general	REMOVE
0.0139	84	3127	31	0.01	0.369	GO:0002028	BP	2	regulation of sodium ion transport	2	general	REMOVE
0.0115	9	3127	8	0.003	0.889	GO:1901203	BP	2	positive regulation of extracellular matrix assembly	3	general	REMOVE
0.0483	105	3127	35	0.011	0.333	GO:0090279	BP	2	regulation of calcium ion import	1	general	REMOVE
4.34E-42	17011	3127	3003	0.96	0.177	GO:0008150	BP	2	biological_process	1	general	REMOVE
9.95E-14	319	3127	114	0.036	0.357	GO:0048511	BP	2	rhythmic process	2	general	REMOVE
2.27E-108	2654	3127	868	0.278	0.327	GO:0051641	BP	2	cellular localization	3	general	REMOVE
3.15E-109	4117	3127	1179	0.377	0.286	GO:0043412	BP	2	macromolecule modification	5	general	REMOVE
1.02E-45	2366	3127	654	0.209	0.276	GO:0051704	BP	2	multi-organism process	2	general	REMOVE
0.0000429	111	3127	43	0.014	0.387	GO:0035821	BP	2	modification of morphology or physiology of other organism	3	general	REMOVE
2.75E-28	1639	3127	449	0.144	0.274	GO:0040011	BP	2	locomotion	2	general	REMOVE
1.61E-107	2916	3127	924	0.295	0.317	GO:0044085	BP	2	cellular component biogenesis	3	general	REMOVE
1.88E-32	7105	3127	1483	0.474	0.209	GO:0032501	BP	2	multicellular organismal process	2	general	REMOVE
6.14E-100	11521	3127	2421	0.774	0.21	GO:0065007	BP	2	biological regulation	2	general	REMOVE
8.13E-110	2889	3127	923	0.295	0.319	GO:0065009	BP	2	regulation of molecular function	3	general	REMOVE
1.06E-89	1870	3127	650	0.208	0.348	GO:0044093	BP	2	positive regulation of molecular function	4	general	REMOVE
3.79E-31	311	3127	143	0.046	0.46	GO:0051098	BP	2	regulation of binding	4	general	REMOVE
4.82E-17	148	3127	73	0.023	0.493	GO:0051099	BP	2	positive regulation of binding	5	general	REMOVE
0.000000279	80	3127	38	0.012	0.475	GO:0032092	BP	2	positive regulation of protein binding	6	general	REMOVE
5.97E-39	1090	3127	357	0.114	0.328	GO:0044092	BP	2	negative regulation of molecular function	4	general	REMOVE
6.85E-10	138	3127	59	0.019	0.428	GO:0051100	BP	2	negative regulation of binding	5	general	REMOVE
0.000000151	82	3127	39	0.012	0.476	GO:0032091	BP	2	negative regulation of protein binding	6	general	REMOVE
1.94E-50	3428	3127	883	0.282	0.258	GO:0065008	BP	2	regulation of biological quality	3	general	REMOVE
4.97E-54	13288	3127	2550	0.815	0.192	GO:0044699	BP	2	single-organism process	2	general	REMOVE
1.38E-53	6090	3127	1391	0.445	0.228	GO:0044707	BP	2	single-multicellular organism process	3	general	REMOVE
1.33E-29	3256	3127	776	0.248	0.238	GO:1902578	BP	2	single-organism localization	3	general	REMOVE
2.34E-52	935	3127	348	0.111	0.372	GO:1902580	BP	2	single-organism cellular localization	4	general	REMOVE
0.000000205	178	3127	65	0.021	0.365	GO:0031099	BP	2	regeneration	4	general	REMOVE
0.01	79	3127	30	0.01	0.38	GO:0031100	BP	2	animal organ regeneration	7	general	REMOVE
0.000775	412	3127	108	0.035	0.262	GO:0044708	BP	2	single-organism behavior	3	general	REMOVE
9.76E-88	15390	3127	2906	0.929	0.189	GO:0009987	BP	2	cellular process	2	general	REMOVE
7.53E-84	10663	3127	2250	0.72	0.211	GO:0044763	BP	2	single-organism cellular process	3	general	REMOVE
2.85E-27	1334	3127	381	0.122	0.286	GO:0001775	BP	2	cell activation	4	general	REMOVE
0.00652	281	3127	77	0.025	0.274	GO:0043414	BP	2	macromolecule methylation	5	general	REMOVE
0.00367	95	3127	35	0.011	0.368	GO:0051261	BP	2	protein depolymerization	8	general	REMOVE
3.33E-106	10923	3127	2348	0.751	0.215	GO:0050789	BP	2	regulation of biological process	2	general	REMOVE
4.75E-50	2643	3127	724	0.232	0.274	GO:0051239	BP	2	regulation of multicellular organismal process	3	general	REMOVE
2.41E-10	347	3127	113	0.036	0.326	GO:0043900	BP	2	regulation of multi-organism process	3	general	REMOVE
1.38E-54	791	3127	315	0.101	0.398	GO:0044087	BP	2	regulation of cellular component biogenesis	3	general	REMOVE
1.67E-20	791	3127	242	0.077	0.306	GO:0040012	BP	2	regulation of locomotion	3	general	REMOVE
5.89E-107	10297	3127	2255	0.721	0.219	GO:0050794	BP	2	regulation of cellular process	3	general	REMOVE
0.0000711	144	3127	51	0.016	0.354	GO:0008360	BP	2	regulation of cell shape	6	general	REMOVE
2.61E-13	516	3127	160	0.051	0.31	GO:0050865	BP	2	regulation of cell activation	4	general	REMOVE
1.92E-132	5307	3127	1466	0.469	0.276	GO:0048518	BP	2	positive regulation of biological process	2	general	REMOVE
1.03E-10	158	3127	66	0.021	0.418	GO:0043902	BP	2	positive regulation of multi-organism process	3	general	REMOVE
5.12E-140	4681	3127	1361	0.435	0.291	GO:0048522	BP	2	positive regulation of cellular process	3	general	REMOVE
9.66E-08	333	3127	103	0.033	0.309	GO:0050867	BP	2	positive regulation of cell activation	4	general	REMOVE
1.17E-28	1431	3127	406	0.13	0.284	GO:0051240	BP	2	positive regulation of multicellular organismal process	3	general	REMOVE
6.45E-14	428	3127	141	0.045	0.329	GO:0040017	BP	2	positive regulation of locomotion	3	general	REMOVE
6.55E-32	456	3127	185	0.059	0.406	GO:0044089	BP	2	positive regulation of cellular component biogenesis	3	general	REMOVE
3.71E-120	4739	3127	1328	0.425	0.28	GO:0048519	BP	2	negative regulation of biological process	2	general	REMOVE
7.99E-15	993	3127	269	0.086	0.271	GO:0051241	BP	2	negative regulation of multicellular organismal process	3	general	REMOVE
4.25E-106	4244	3127	1197	0.383	0.282	GO:0048523	BP	2	negative regulation of cellular process	3	general	REMOVE
0.00902	161	3127	50	0.016	0.311	GO:0050866	BP	2	negative regulation of cell activation	4	general	REMOVE
0.0144	491	3127	119	0.038	0.242	GO:0044057	BP	2	regulation of system process	1	general	REMOVE
0.000286	257	3127	76	0.024	0.296	GO:0050890	BP	2	cognition	1	general	REMOVE
0.00000449	223	3127	73	0.023	0.327	GO:0007611	BP	2	learning or memory	2	general	REMOVE
0.00617	29	3127	16	0.005	0.552	GO:1903053	BP	2	regulation of extracellular matrix organization	1	matrix	REMOVE
0.00299	17	3127	12	0.004	0.706	GO:1903055	BP	2	positive regulation of extracellular matrix organization	2	matrix	REMOVE
0.0337	12	3127	9	0.003	0.75	GO:1901201	BP	2	regulation of extracellular matrix assembly	2	matrix	REMOVE
7.92E-24	1164	3127	334	0.107	0.287	GO:1901565	BP	2	organonitrogen compound catabolic process	5	metabolism	REMOVE
0.0288	1174	3127	248	0.079	0.211	GO:0019637	BP	2	organophosphate metabolic process	5	metabolism	REMOVE
0.0171	269	3127	73	0.023	0.271	GO:0030258	BP	2	lipid modification	1	metabolism	REMOVE
0.000325	110	3127	41	0.013	0.373	GO:0046834	BP	2	lipid phosphorylation	2	metabolism	REMOVE
0.000494	301	3127	85	0.027	0.282	GO:0009141	BP	2	nucleoside triphosphate metabolic process	1	metabolism	REMOVE
0.000146	280	3127	82	0.026	0.293	GO:0009199	BP	2	ribonucleoside triphosphate metabolic process	2	metabolism	REMOVE
0.000174	281	3127	82	0.026	0.292	GO:0009144	BP	2	purine nucleoside triphosphate metabolic process	2	metabolism	REMOVE
0.000112	274	3127	81	0.026	0.296	GO:0009205	BP	2	purine ribonucleoside triphosphate metabolic process	3	metabolism	REMOVE
5.07E-54	11266	3127	2250	0.72	0.2	GO:0008152	BP	2	metabolic process	2	metabolism	REMOVE
1.22E-62	10376	3127	2141	0.685	0.206	GO:0044238	BP	2	primary metabolic process	3	metabolism	REMOVE
4.22E-36	6285	3127	1357	0.434	0.216	GO:0009058	BP	2	biosynthetic process	3	metabolism	REMOVE
4.83E-71	9844	3127	2084	0.666	0.212	GO:0006807	BP	2	nitrogen compound metabolic process	3	metabolism	REMOVE
2.45E-48	2301	3127	648	0.207	0.282	GO:0009056	BP	2	catabolic process	3	metabolism	REMOVE
8.83E-61	10755	3127	2194	0.702	0.204	GO:0071704	BP	2	organic substance metabolic process	3	metabolism	REMOVE
7.35E-91	9129	3127	2028	0.649	0.222	GO:0043170	BP	2	macromolecule metabolic process	4	metabolism	REMOVE
0.0369	108	3127	36	0.012	0.333	GO:0005976	BP	2	polysaccharide metabolic process	5	metabolism	REMOVE
0.0175	77	3127	29	0.009	0.377	GO:0044042	BP	2	glucan metabolic process	6	metabolism	REMOVE
0.0175	77	3127	29	0.009	0.377	GO:0006073	BP	2	cellular glucan metabolic process	7	metabolism	REMOVE
0.0473	50	3127	21	0.007	0.42	GO:0009250	BP	2	glucan biosynthetic process	8	metabolism	REMOVE
1.1E-83	6642	3127	1586	0.507	0.239	GO:1901564	BP	2	organonitrogen compound metabolic process	4	metabolism	REMOVE
3.74E-103	5592	3127	1449	0.463	0.259	GO:0019538	BP	2	protein metabolic process	5	metabolism	REMOVE
0.0000171	32	3127	20	0.006	0.625	GO:0042982	BP	2	amyloid precursor protein metabolic process	6	metabolism	REMOVE
9.41E-42	1884	3127	541	0.173	0.287	GO:1901575	BP	2	organic substance catabolic process	4	metabolism	REMOVE
7.13E-60	1205	3127	430	0.138	0.357	GO:0009057	BP	2	macromolecule catabolic process	5	metabolism	REMOVE
8.3E-36	826	3127	287	0.092	0.347	GO:0030163	BP	2	protein catabolic process	6	metabolism	REMOVE
8.84E-38	6210	3127	1351	0.432	0.218	GO:1901576	BP	2	organic substance biosynthetic process	4	metabolism	REMOVE
4.91E-13	1853	3127	435	0.139	0.235	GO:1901566	BP	2	organonitrogen compound biosynthetic process	5	metabolism	REMOVE
2.26E-49	5118	3127	1200	0.384	0.234	GO:0009059	BP	2	macromolecule biosynthetic process	5	metabolism	REMOVE
2.94E-56	6166	3127	1414	0.452	0.229	GO:1901360	BP	2	organic cyclic compound metabolic process	4	metabolism	REMOVE
2.64E-11	461	3127	142	0.045	0.308	GO:1901361	BP	2	organic cyclic compound catabolic process	5	metabolism	REMOVE
3.49E-31	4454	3127	1007	0.322	0.226	GO:1901362	BP	2	organic cyclic compound biosynthetic process	5	metabolism	REMOVE
8.52E-14	4255	3127	884	0.283	0.208	GO:0044710	BP	2	single-organism metabolic process	3	metabolism	REMOVE
0.00337	952	3127	212	0.068	0.223	GO:0044712	BP	2	single-organism catabolic process	4	metabolism	REMOVE
1.16E-78	10371	3127	2190	0.7	0.211	GO:0044237	BP	2	cellular metabolic process	3	metabolism	REMOVE
1.8E-95	3191	3127	956	0.306	0.3	GO:0006793	BP	2	phosphorus metabolic process	4	metabolism	REMOVE
1.84E-100	3104	3127	949	0.303	0.306	GO:0006796	BP	2	phosphate-containing compound metabolic process	5	metabolism	REMOVE
0.0000208	94	3127	39	0.012	0.415	GO:0046939	BP	2	nucleotide phosphorylation	7	metabolism	REMOVE
3.36E-111	8340	3127	1953	0.625	0.234	GO:0044260	BP	2	cellular macromolecule metabolic process	4	metabolism	REMOVE
8.62E-12	155	3127	67	0.021	0.432	GO:0043112	BP	2	receptor metabolic process	5	metabolism	REMOVE
2.99E-130	4887	3127	1380	0.441	0.282	GO:0044267	BP	2	cellular protein metabolic process	5	metabolism	REMOVE
7.37E-50	1944	3127	576	0.184	0.296	GO:0044248	BP	2	cellular catabolic process	4	metabolism	REMOVE
5.94E-52	966	3127	355	0.114	0.367	GO:0044265	BP	2	cellular macromolecule catabolic process	5	metabolism	REMOVE
1.26E-26	581	3127	207	0.066	0.356	GO:0043632	BP	2	modification-dependent macromolecule catabolic process	6	metabolism	REMOVE
6.66E-30	678	3127	238	0.076	0.351	GO:0044257	BP	2	cellular protein catabolic process	6	metabolism	REMOVE
1.21E-27	641	3127	224	0.072	0.349	GO:0051603	BP	2	proteolysis involved in cellular protein catabolic process	7	metabolism	REMOVE
0.00544	23	3127	14	0.004	0.609	GO:0032801	BP	2	receptor catabolic process	5	metabolism	REMOVE
5.16E-68	6394	3127	1494	0.478	0.234	GO:0034641	BP	2	cellular nitrogen compound metabolic process	4	metabolism	REMOVE
7.22E-13	422	3127	137	0.044	0.325	GO:0044270	BP	2	cellular nitrogen compound catabolic process	5	metabolism	REMOVE
2.17E-27	940	3127	294	0.094	0.313	GO:0043603	BP	2	cellular amide metabolic process	5	metabolism	REMOVE
4.85E-32	786	3127	269	0.086	0.342	GO:0006518	BP	2	peptide metabolic process	6	metabolism	REMOVE
6.44E-60	5956	3127	1389	0.444	0.233	GO:0006725	BP	2	cellular aromatic compound metabolic process	4	metabolism	REMOVE
1.24E-12	433	3127	139	0.044	0.321	GO:0019439	BP	2	aromatic compound catabolic process	5	metabolism	REMOVE
4.12E-08	232	3127	80	0.026	0.345	GO:0072593	BP	2	reactive oxygen species metabolic process	4	metabolism	REMOVE
0.0185	85	3127	31	0.01	0.365	GO:1903409	BP	2	reactive oxygen species biosynthetic process	5	metabolism	REMOVE
0.000156	372	3127	102	0.033	0.274	GO:0006091	BP	2	generation of precursor metabolites and energy	4	metabolism	REMOVE
1.05E-60	5919	3127	1385	0.443	0.234	GO:0046483	BP	2	heterocycle metabolic process	4	metabolism	REMOVE
3.73E-13	419	3127	137	0.044	0.327	GO:0046700	BP	2	heterocycle catabolic process	5	metabolism	REMOVE
1.93E-65	5750	3127	1370	0.438	0.238	GO:0006139	BP	2	nucleobase-containing compound metabolic process	5	metabolism	REMOVE
7.14E-70	5104	3127	1265	0.405	0.248	GO:0090304	BP	2	nucleic acid metabolic process	6	metabolism	REMOVE
9.58E-17	373	3127	134	0.043	0.359	GO:0034655	BP	2	nucleobase-containing compound catabolic process	6	metabolism	REMOVE
1.25E-35	6126	3127	1327	0.424	0.217	GO:0044249	BP	2	cellular biosynthetic process	4	metabolism	REMOVE
5.55E-49	4876	3127	1154	0.369	0.237	GO:0044271	BP	2	cellular nitrogen compound biosynthetic process	5	metabolism	REMOVE
2.85E-31	723	3127	252	0.081	0.349	GO:0043604	BP	2	amide biosynthetic process	6	metabolism	REMOVE
5.78E-35	648	3127	241	0.077	0.372	GO:0043043	BP	2	peptide biosynthetic process	7	metabolism	REMOVE
4.16E-33	4318	3127	990	0.317	0.229	GO:0019438	BP	2	aromatic compound biosynthetic process	5	metabolism	REMOVE
3.05E-33	4315	3127	990	0.317	0.229	GO:0018130	BP	2	heterocycle biosynthetic process	5	metabolism	REMOVE
3.98E-34	4247	3127	981	0.314	0.231	GO:0034654	BP	2	nucleobase-containing compound biosynthetic process	6	metabolism	REMOVE
1.53E-48	4982	3127	1172	0.375	0.235	GO:0034645	BP	2	cellular macromolecule biosynthetic process	5	metabolism	REMOVE
2.74E-107	6314	3127	1592	0.509	0.252	GO:0019222	BP	2	regulation of metabolic process	3	metabolism	REMOVE
4.89E-109	5851	3127	1512	0.484	0.258	GO:0060255	BP	2	regulation of macromolecule metabolic process	4	metabolism	REMOVE
1.71E-49	4321	3127	1052	0.336	0.243	GO:0009889	BP	2	regulation of biosynthetic process	4	metabolism	REMOVE
7.91E-52	4085	3127	1015	0.325	0.248	GO:0010556	BP	2	regulation of macromolecule biosynthetic process	5	metabolism	REMOVE
3.95E-64	742	3127	318	0.102	0.429	GO:0009894	BP	2	regulation of catabolic process	4	metabolism	REMOVE
3.64E-91	5732	3127	1443	0.461	0.252	GO:0080090	BP	2	regulation of primary metabolic process	4	metabolism	REMOVE
0.00000205	147	3127	55	0.018	0.374	GO:0006109	BP	2	regulation of carbohydrate metabolic process	5	metabolism	REMOVE
0.0156	37	3127	18	0.006	0.486	GO:0032881	BP	2	regulation of polysaccharide metabolic process	6	metabolism	REMOVE
0.0497	43	3127	19	0.006	0.442	GO:0043470	BP	2	regulation of carbohydrate catabolic process	6	metabolism	REMOVE
1.39E-90	5616	3127	1420	0.454	0.253	GO:0051171	BP	2	regulation of nitrogen compound metabolic process	4	metabolism	REMOVE
1.46E-130	2484	3127	873	0.279	0.351	GO:0051246	BP	2	regulation of protein metabolic process	5	metabolism	REMOVE
5.07E-25	703	3127	233	0.075	0.331	GO:0030162	BP	2	regulation of proteolysis	6	metabolism	REMOVE
2.39E-38	379	3127	174	0.056	0.459	GO:0042176	BP	2	regulation of protein catabolic process	6	metabolism	REMOVE
3.5E-18	172	3127	82	0.026	0.477	GO:0032271	BP	2	regulation of protein polymerization	6	metabolism	REMOVE
6.3E-97	5881	3127	1486	0.475	0.253	GO:0031323	BP	2	regulation of cellular metabolic process	4	metabolism	REMOVE
4.93E-51	621	3127	263	0.084	0.424	GO:0031329	BP	2	regulation of cellular catabolic process	5	metabolism	REMOVE
0.01	79	3127	30	0.01	0.38	GO:0033238	BP	2	regulation of cellular amine metabolic process	5	metabolism	REMOVE
3.54E-31	377	3127	162	0.052	0.43	GO:0034248	BP	2	regulation of cellular amide metabolic process	5	metabolism	REMOVE
2.38E-49	4276	3127	1043	0.334	0.244	GO:0031326	BP	2	regulation of cellular biosynthetic process	5	metabolism	REMOVE
1.33E-50	3981	3127	991	0.317	0.249	GO:2000112	BP	2	regulation of cellular macromolecule biosynthetic process	6	metabolism	REMOVE
1.18E-47	4096	3127	1003	0.321	0.245	GO:0019219	BP	2	regulation of nucleobase-containing compound metabolic process	5	metabolism	REMOVE
1.97E-80	1587	3127	564	0.18	0.355	GO:0051174	BP	2	regulation of phosphorus metabolic process	5	metabolism	REMOVE
1.63E-81	1574	3127	563	0.18	0.358	GO:0019220	BP	2	regulation of phosphate metabolic process	6	metabolism	REMOVE
0.000000121	153	3127	59	0.019	0.386	GO:2000377	BP	2	regulation of reactive oxygen species metabolic process	5	metabolism	REMOVE
0.00000252	85	3127	38	0.012	0.447	GO:0043467	BP	2	regulation of generation of precursor metabolites and energy	5	metabolism	REMOVE
4.16E-125	2301	3127	820	0.262	0.356	GO:0032268	BP	2	regulation of cellular protein metabolic process	5	metabolism	REMOVE
8.25E-28	254	3127	121	0.039	0.476	GO:1903362	BP	2	regulation of cellular protein catabolic process	6	metabolism	REMOVE
2.89E-25	230	3127	110	0.035	0.478	GO:1903050	BP	2	regulation of proteolysis involved in cellular protein catabolic process	7	metabolism	REMOVE
7.34E-107	3061	3127	954	0.305	0.312	GO:0009893	BP	2	positive regulation of metabolic process	3	metabolism	REMOVE
1.17E-48	1748	3127	530	0.169	0.303	GO:0009891	BP	2	positive regulation of biosynthetic process	4	metabolism	REMOVE
6.08E-106	2740	3127	882	0.282	0.322	GO:0051173	BP	2	positive regulation of nitrogen compound metabolic process	4	metabolism	REMOVE
2.53E-109	2830	3127	909	0.291	0.321	GO:0010604	BP	2	positive regulation of macromolecule metabolic process	4	metabolism	REMOVE
3.97E-50	1588	3127	498	0.159	0.314	GO:0010557	BP	2	positive regulation of macromolecule biosynthetic process	5	metabolism	REMOVE
2.53E-96	1486	3127	569	0.182	0.383	GO:0051247	BP	2	positive regulation of protein metabolic process	5	metabolism	REMOVE
5.28E-37	414	3127	182	0.058	0.44	GO:0009896	BP	2	positive regulation of catabolic process	4	metabolism	REMOVE
3.04E-22	256	3127	113	0.036	0.441	GO:0045732	BP	2	positive regulation of protein catabolic process	5	metabolism	REMOVE
3.86E-107	2842	3127	907	0.29	0.319	GO:0031325	BP	2	positive regulation of cellular metabolic process	4	metabolism	REMOVE
7.64E-52	1007	3127	365	0.117	0.362	GO:0010562	BP	2	positive regulation of phosphorus metabolic process	5	metabolism	REMOVE
7.64E-52	1007	3127	365	0.117	0.362	GO:0045937	BP	2	positive regulation of phosphate metabolic process	6	metabolism	REMOVE
4.67E-47	1649	3127	504	0.161	0.306	GO:0045935	BP	2	positive regulation of nucleobase-containing compound metabolic process	5	metabolism	REMOVE
1.08E-10	123	3127	56	0.018	0.455	GO:0034250	BP	2	positive regulation of cellular amide metabolic process	5	metabolism	REMOVE
4.3E-33	359	3127	160	0.051	0.446	GO:0031331	BP	2	positive regulation of cellular catabolic process	5	metabolism	REMOVE
0.0000406	85	3127	36	0.012	0.424	GO:2000379	BP	2	positive regulation of reactive oxygen species metabolic process	5	metabolism	REMOVE
1.47E-47	1720	3127	521	0.167	0.303	GO:0031328	BP	2	positive regulation of cellular biosynthetic process	5	metabolism	REMOVE
4.78E-90	1392	3127	534	0.171	0.384	GO:0032270	BP	2	positive regulation of cellular protein metabolic process	5	metabolism	REMOVE
4.13E-32	361	3127	159	0.051	0.44	GO:0045862	BP	2	positive regulation of proteolysis	6	metabolism	REMOVE
2.55E-18	188	3127	87	0.028	0.463	GO:1903364	BP	2	positive regulation of cellular protein catabolic process	6	metabolism	REMOVE
1.18E-16	173	3127	80	0.026	0.462	GO:1903052	BP	2	positive regulation of proteolysis involved in cellular protein catabolic process	7	metabolism	REMOVE
3.96E-13	108	3127	55	0.018	0.509	GO:0032273	BP	2	positive regulation of protein polymerization	5	metabolism	REMOVE
1.55E-83	2680	3127	819	0.262	0.306	GO:0009892	BP	2	negative regulation of metabolic process	3	metabolism	REMOVE
4.49E-83	2451	3127	768	0.246	0.313	GO:0010605	BP	2	negative regulation of macromolecule metabolic process	4	metabolism	REMOVE
8.27E-68	2218	3127	681	0.218	0.307	GO:0051172	BP	2	negative regulation of nitrogen compound metabolic process	4	metabolism	REMOVE
2.96E-55	1056	3127	384	0.123	0.364	GO:0051248	BP	2	negative regulation of protein metabolic process	5	metabolism	REMOVE
2.42E-11	198	3127	78	0.025	0.394	GO:0009895	BP	2	negative regulation of catabolic process	4	metabolism	REMOVE
3.63E-08	99	3127	45	0.014	0.455	GO:0042177	BP	2	negative regulation of protein catabolic process	5	metabolism	REMOVE
2.65E-35	1477	3127	435	0.139	0.295	GO:0009890	BP	2	negative regulation of biosynthetic process	4	metabolism	REMOVE
7.65E-36	1384	3127	416	0.133	0.301	GO:0010558	BP	2	negative regulation of macromolecule biosynthetic process	5	metabolism	REMOVE
6.69E-10	117	3127	53	0.017	0.453	GO:0031333	BP	2	negative regulation of protein complex assembly	5	metabolism	REMOVE
4.77E-69	2360	3127	715	0.229	0.303	GO:0031324	BP	2	negative regulation of cellular metabolic process	4	metabolism	REMOVE
2.25E-32	551	3127	211	0.067	0.383	GO:0010563	BP	2	negative regulation of phosphorus metabolic process	5	metabolism	REMOVE
5.45E-32	550	3127	210	0.067	0.382	GO:0045936	BP	2	negative regulation of phosphate metabolic process	6	metabolism	REMOVE
1.02E-15	161	3127	75	0.024	0.466	GO:0034249	BP	2	negative regulation of cellular amide metabolic process	5	metabolism	REMOVE
2.82E-34	1458	3127	428	0.137	0.294	GO:0031327	BP	2	negative regulation of cellular biosynthetic process	5	metabolism	REMOVE
2.71E-34	1317	3127	397	0.127	0.301	GO:2000113	BP	2	negative regulation of cellular macromolecule biosynthetic process	6	metabolism	REMOVE
8.75E-30	1351	3127	392	0.125	0.29	GO:0045934	BP	2	negative regulation of nucleobase-containing compound metabolic process	5	metabolism	REMOVE
0.00000442	138	3127	52	0.017	0.377	GO:0031330	BP	2	negative regulation of cellular catabolic process	5	metabolism	REMOVE
1.37E-50	993	3127	359	0.115	0.362	GO:0032269	BP	2	negative regulation of cellular protein metabolic process	5	metabolism	REMOVE
0.00179	49	3127	23	0.007	0.469	GO:1903363	BP	2	negative regulation of cellular protein catabolic process	6	metabolism	REMOVE
0.000594	316	3127	88	0.028	0.278	GO:0009123	BP	2	nucleoside monophosphate metabolic process	1	metabolism	REMOVE
0.0000523	292	3127	86	0.028	0.295	GO:0009126	BP	2	purine nucleoside monophosphate metabolic process	2	metabolism	REMOVE
0.000157	303	3127	87	0.028	0.287	GO:0009161	BP	2	ribonucleoside monophosphate metabolic process	2	metabolism	REMOVE
0.0000439	291	3127	86	0.028	0.296	GO:0009167	BP	2	purine ribonucleoside monophosphate metabolic process	3	metabolism	REMOVE
0.00602	26	3127	15	0.005	0.577	GO:0006735	BP	2	NADH regeneration	1	metabolism	REMOVE
0.00359	123	3127	42	0.013	0.341	GO:0010675	BP	2	regulation of cellular carbohydrate metabolic process	1	metabolism	REMOVE
0.000113	283	3127	83	0.027	0.293	GO:0019216	BP	2	regulation of lipid metabolic process	1	metabolism	REMOVE
0.000118	126	3127	46	0.015	0.365	GO:0045834	BP	2	positive regulation of lipid metabolic process	2	metabolism	REMOVE
0.000305	196	3127	62	0.02	0.316	GO:0006006	BP	2	glucose metabolic process	1	metabolism	REMOVE
0.0196	31	3127	16	0.005	0.516	GO:0006007	BP	2	glucose catabolic process	2	metabolism	REMOVE
0.0159	195	3127	57	0.018	0.292	GO:0016051	BP	2	carbohydrate biosynthetic process	1	metabolism	REMOVE
0.000191	82	3127	34	0.011	0.415	GO:0043255	BP	2	regulation of carbohydrate biosynthetic process	2	metabolism	REMOVE
0.00321	34	3127	18	0.006	0.529	GO:0032885	BP	2	regulation of polysaccharide biosynthetic process	3	metabolism	REMOVE
0.0229	106	3127	36	0.012	0.34	GO:0006090	BP	2	pyruvate metabolic process	1	metabolism	REMOVE
0.00602	26	3127	15	0.005	0.577	GO:0061718	BP	2	glucose catabolic process to pyruvate	2	metabolism	REMOVE
0.0174	160	3127	49	0.016	0.306	GO:0010565	BP	2	regulation of cellular ketone metabolic process	1	metabolism	REMOVE
0.0415	80	3127	29	0.009	0.362	GO:0006094	BP	2	gluconeogenesis	1	metabolism	REMOVE
0.000000806	114	3127	47	0.015	0.412	GO:0009132	BP	2	nucleoside diphosphate metabolic process	1	metabolism	REMOVE
1.13E-08	93	3127	44	0.014	0.473	GO:0009135	BP	2	purine nucleoside diphosphate metabolic process	2	metabolism	REMOVE
2.79E-08	95	3127	44	0.014	0.463	GO:0009185	BP	2	ribonucleoside diphosphate metabolic process	2	metabolism	REMOVE
1.13E-08	93	3127	44	0.014	0.473	GO:0009179	BP	2	purine ribonucleoside diphosphate metabolic process	3	metabolism	REMOVE
0.0129	76	3127	29	0.009	0.382	GO:0005977	BP	2	glycogen metabolic process	1	metabolism	REMOVE
0.0473	50	3127	21	0.007	0.42	GO:0005978	BP	2	glycogen biosynthetic process	2	metabolism	REMOVE
0.0488	549	3127	128	0.041	0.233	GO:0009259	BP	2	ribonucleotide metabolic process	1	metabolism	REMOVE
0.0207	550	3127	130	0.042	0.236	GO:0006163	BP	2	purine nucleotide metabolic process	1	metabolism	REMOVE
0.0311	534	3127	126	0.04	0.236	GO:0009150	BP	2	purine ribonucleotide metabolic process	2	metabolism	REMOVE
0.0000663	249	3127	76	0.024	0.305	GO:0046034	BP	2	ATP metabolic process	3	metabolism	REMOVE
0.00000151	77	3127	36	0.012	0.468	GO:0046031	BP	2	ADP metabolic process	3	metabolism	REMOVE
0.00000945	71	3127	33	0.011	0.465	GO:0006757	BP	2	ATP generation from ADP	4	metabolism	REMOVE
0.000006	70	3127	33	0.011	0.471	GO:0006096	BP	2	glycolytic process	5	metabolism	REMOVE
0.00165	27	3127	16	0.005	0.593	GO:0061615	BP	2	glycolytic process through fructose-6-phosphate	6	metabolism	REMOVE
0.00165	27	3127	16	0.005	0.593	GO:0061620	BP	2	glycolytic process through glucose-6-phosphate	7	metabolism	REMOVE
0.00602	26	3127	15	0.005	0.577	GO:0061621	BP	2	canonical glycolysis	8	metabolism	REMOVE
0.00000801	64	3127	31	0.01	0.484	GO:1903725	BP	2	regulation of phospholipid metabolic process	1	metabolism	REMOVE
0.000000257	43	3127	26	0.008	0.605	GO:1903727	BP	2	positive regulation of phospholipid metabolic process	2	metabolism	REMOVE
0.00651	52	3127	23	0.007	0.442	GO:1903578	BP	2	regulation of ATP metabolic process	1	metabolism	REMOVE
0.000000163	197	3127	70	0.022	0.355	GO:0007623	BP	2	circadian rhythm	3	physiology	REMOVE
2.74E-09	500	3127	145	0.046	0.29	GO:0050878	BP	2	regulation of body fluid levels	4	physiology	REMOVE
0.00164	370	3127	98	0.031	0.265	GO:0001503	BP	2	ossification	4	physiology	REMOVE
0.00000306	1362	3127	307	0.098	0.225	GO:0000003	BP	2	reproduction	2	physiology	REMOVE
0.00413	819	3127	186	0.059	0.227	GO:0032504	BP	2	multicellular organism reproduction	3	physiology	REMOVE
0.00000282	1361	3127	307	0.098	0.226	GO:0022414	BP	2	reproductive process	2	physiology	REMOVE
0.0473	967	3127	208	0.067	0.215	GO:0044703	BP	2	multi-organism reproductive process	3	physiology	REMOVE
0.00000019	1232	3127	288	0.092	0.234	GO:0044702	BP	2	single organism reproductive process	3	physiology	REMOVE
0.00176	809	3127	186	0.059	0.23	GO:0048609	BP	2	multicellular organismal reproductive process	3	physiology	REMOVE
0.00129	107	3127	39	0.012	0.364	GO:0042698	BP	2	ovulation cycle	4	physiology	REMOVE
0.00492	100	3127	36	0.012	0.36	GO:0042752	BP	2	regulation of circadian rhythm	3	physiology	REMOVE
1.67E-15	289	3127	110	0.035	0.381	GO:0007568	BP	2	aging	4	physiology - ageing	REMOVE
1.45E-09	92	3127	45	0.014	0.489	GO:0007569	BP	2	cell aging	5	physiology - ageing	REMOVE
0.0337	12	3127	9	0.003	0.75	GO:0090399	BP	2	replicative senescence	6	physiology - ageing	REMOVE
0.00052	53	3127	25	0.008	0.472	GO:0090398	BP	2	cellular senescence	5	physiology - ageing	REMOVE
1.41E-10	353	3127	115	0.037	0.326	GO:0007599	BP	2	hemostasis	5	physiology - haematology	REMOVE
0.00000109	104	3127	44	0.014	0.423	GO:0034101	BP	2	erythrocyte homeostasis	7	physiology - haematology	REMOVE
1.41E-10	353	3127	115	0.037	0.326	GO:0050817	BP	2	coagulation	4	physiology - haematology	REMOVE
1.19E-10	348	3127	114	0.036	0.328	GO:0007596	BP	2	blood coagulation	5	physiology - haematology	REMOVE
6.75E-17	733	3127	219	0.07	0.299	GO:0030097	BP	2	hemopoiesis	5	physiology - haematology	REMOVE
5.71E-11	160	3127	67	0.021	0.419	GO:0030168	BP	2	platelet activation	5	physiology - haematology	REMOVE
0.000281	55	3127	26	0.008	0.473	GO:0070527	BP	2	platelet aggregation	6	physiology - haematology	REMOVE
1.53E-10	324	3127	108	0.035	0.333	GO:1903706	BP	2	regulation of hemopoiesis	4	physiology - haematology	REMOVE
0.00306	160	3127	51	0.016	0.319	GO:1903708	BP	2	positive regulation of hemopoiesis	4	physiology - haematology	REMOVE
0.0442	130	3127	41	0.013	0.315	GO:1903707	BP	2	negative regulation of hemopoiesis	4	physiology - haematology	REMOVE
0.00262	216	3127	64	0.02	0.296	GO:0033500	BP	8	carbohydrate homeostasis	1	physiology - homostatasis	REMOVE
0.00262	216	3127	64	0.02	0.296	GO:0042593	BP	8	glucose homeostasis	2	physiology - homostatasis	REMOVE
4.1E-17	1624	3127	407	0.13	0.251	GO:0042592	BP	2	homeostatic process	4	physiology - homostatasis	REMOVE
3.66E-16	370	3127	132	0.042	0.357	GO:0060249	BP	2	anatomical structure homeostasis	5	physiology - homostatasis	REMOVE
7.4E-14	229	3127	91	0.029	0.397	GO:0048872	BP	2	homeostasis of number of cells	5	physiology - homostatasis	REMOVE
0.0131	828	3127	185	0.059	0.223	GO:0019725	BP	2	cellular homeostasis	4	physiology - homostatasis	REMOVE
7.33E-17	449	3127	153	0.049	0.341	GO:0032844	BP	2	regulation of homeostatic process	3	physiology - homostatasis	REMOVE
1.66E-09	208	3127	77	0.025	0.37	GO:0032846	BP	2	positive regulation of homeostatic process	3	physiology - homostatasis	REMOVE
0.0000134	182	3127	62	0.02	0.341	GO:0032845	BP	2	negative regulation of homeostatic process	3	physiology - homostatasis	REMOVE
7.26E-69	801	3127	342	0.109	0.427	GO:0044419	BP	2	interspecies interaction between organisms	3	physiology - host	REMOVE
3.32E-69	799	3127	342	0.109	0.428	GO:0044403	BP	2	symbiosis, encompassing mutualism through parasitism	4	physiology - host	REMOVE
2.42E-11	198	3127	78	0.025	0.394	GO:0051701	BP	2	interaction with host	4	physiology - host	REMOVE
0.0207	55	3127	23	0.007	0.418	GO:0051702	BP	2	interaction with symbiont	4	physiology - host	REMOVE
0.000000411	91	3127	41	0.013	0.451	GO:0051817	BP	2	modification of morphology or physiology of other organism involved in symbiotic interaction	4	physiology - host	REMOVE
0.0000813	43	3127	23	0.007	0.535	GO:0044003	BP	2	modification by symbiont of host morphology or physiology	5	physiology - host	REMOVE
0.0392	26	3127	14	0.004	0.538	GO:0044068	BP	2	modulation by symbiont of host cellular process	6	physiology - host	REMOVE
3.43E-12	207	3127	82	0.026	0.396	GO:0043903	BP	2	regulation of symbiosis, encompassing mutualism through parasitism	4	physiology - host	REMOVE
0.00722	42	3127	20	0.006	0.476	GO:0014743	BP	2	regulation of muscle hypertrophy	3	physiology - muscle	REMOVE
0.00271	40	3127	20	0.006	0.5	GO:0010611	BP	2	regulation of cardiac muscle hypertrophy	4	physiology - muscle	REMOVE
0.0294	71	3127	27	0.009	0.38	GO:0055117	BP	6	regulation of cardiac muscle contraction	2	physiology - muscle	REMOVE
0.0292	35	3127	17	0.005	0.486	GO:0086004	BP	6	regulation of cardiac muscle cell contraction	1	physiology - muscle	REMOVE
0.0235	127	3127	41	0.013	0.323	GO:0060048	BP	6	cardiac muscle contraction	1	physiology - muscle	REMOVE
0.00182	19	3127	13	0.004	0.684	GO:0035994	BP	2	response to muscle stretch	5	physiology - muscle	REMOVE
2.58E-11	358	3127	118	0.038	0.33	GO:0060537	BP	2	muscle tissue development	5	physiology - muscle	REMOVE
1.55E-10	345	3127	113	0.036	0.328	GO:0014706	BP	2	striated muscle tissue development	6	physiology - muscle	REMOVE
0.0143	159	3127	49	0.016	0.308	GO:0007519	BP	2	skeletal muscle tissue development	7	physiology - muscle	REMOVE
0.00111	168	3127	54	0.017	0.321	GO:0033002	BP	2	muscle cell proliferation	4	physiology - muscle	REMOVE
5.39E-12	581	3127	171	0.055	0.294	GO:0061061	BP	2	muscle structure development	4	physiology - muscle	REMOVE
0.0000233	355	3127	101	0.032	0.285	GO:0007517	BP	2	muscle organ development	7	physiology - muscle	REMOVE
0.0000121	249	3127	78	0.025	0.313	GO:0051146	BP	2	striated muscle cell differentiation	7	physiology - muscle	REMOVE
0.000149	119	3127	44	0.014	0.37	GO:1901861	BP	2	regulation of muscle tissue development	4	physiology - muscle	REMOVE
0.00045	119	3127	43	0.014	0.361	GO:0048634	BP	2	regulation of muscle organ development	5	physiology - muscle	REMOVE
0.000258	117	3127	43	0.014	0.368	GO:0016202	BP	2	regulation of striated muscle tissue development	6	physiology - muscle	REMOVE
0.0491	65	3127	25	0.008	0.385	GO:0055024	BP	2	regulation of cardiac muscle tissue development	7	physiology - muscle	REMOVE
0.000000222	404	3127	118	0.038	0.292	GO:0003012	BP	2	muscle system process	1	physiology - muscle	REMOVE
0.0000124	89	3127	38	0.012	0.427	GO:0043500	BP	2	muscle adaptation	2	physiology - muscle	REMOVE
0.00123	69	3127	29	0.009	0.42	GO:0014896	BP	2	muscle hypertrophy	2	physiology - muscle	REMOVE
0.000573	67	3127	29	0.009	0.433	GO:0014897	BP	2	striated muscle hypertrophy	3	physiology - muscle	REMOVE
0.000256	65	3127	29	0.009	0.446	GO:0003300	BP	2	cardiac muscle hypertrophy	4	physiology - muscle	REMOVE
0.00159	332	3127	90	0.029	0.271	GO:0006936	BP	2	muscle contraction	2	physiology - muscle	REMOVE
0.0000186	200	3127	66	0.021	0.33	GO:0090257	BP	2	regulation of muscle system process	2	physiology - muscle	REMOVE
0.0000111	68	3127	32	0.01	0.471	GO:0043502	BP	2	regulation of muscle adaptation	3	physiology - muscle	REMOVE
0.0339	116	3127	38	0.012	0.328	GO:0048660	BP	2	regulation of smooth muscle cell proliferation	1	physiology - muscle	REMOVE
1.02E-18	539	3127	179	0.057	0.332	GO:0042060	BP	2	wound healing	5	physiology - response to wound	REMOVE
0.0000386	126	3127	47	0.015	0.373	GO:0061041	BP	2	regulation of wound healing	6	physiology - response to wound	REMOVE
3.84E-23	646	3127	215	0.069	0.333	GO:0009611	BP	2	response to wounding	4	physiology - response to wound	REMOVE
0.000000155	150	3127	58	0.019	0.387	GO:1903034	BP	2	regulation of response to wounding	5	physiology - response to wound	REMOVE
0.0214	25	3127	14	0.004	0.56	GO:0039694	BP	2	viral RNA genome replication	7	physiology - virus	REMOVE
7.56E-67	755	3127	326	0.104	0.432	GO:0016032	BP	2	viral process	5	physiology - virus	REMOVE
7.03E-16	184	3127	82	0.026	0.446	GO:0019080	BP	2	viral gene expression	6	physiology - virus	REMOVE
3.95E-12	313	3127	109	0.035	0.348	GO:0019058	BP	2	viral life cycle	6	physiology - virus	REMOVE
0.0000523	28	3127	18	0.006	0.643	GO:0050690	BP	2	regulation of defense response to virus by virus	6	physiology - virus	REMOVE
3.48E-12	109	3127	54	0.017	0.495	GO:0019079	BP	2	viral genome replication	6	physiology - virus	REMOVE
1.59E-13	173	3127	75	0.024	0.434	GO:0019083	BP	2	viral transcription	6	physiology - virus	REMOVE
0.0000809	37	3127	21	0.007	0.568	GO:0019048	BP	2	modulation by virus of host morphology or physiology	6	physiology - virus	REMOVE
0.0397	23	3127	13	0.004	0.565	GO:0019054	BP	2	modulation by virus of host process	7	physiology - virus	REMOVE
3.32E-08	285	3127	93	0.03	0.326	GO:0009615	BP	2	response to virus	4	physiology - virus	REMOVE
6.51E-12	183	3127	75	0.024	0.41	GO:0050792	BP	2	regulation of viral process	5	physiology - virus	REMOVE
8.86E-08	126	3127	52	0.017	0.413	GO:1903900	BP	2	regulation of viral life cycle	6	physiology - virus	REMOVE
3.69E-09	81	3127	41	0.013	0.506	GO:0045069	BP	2	regulation of viral genome replication	7	physiology - virus	REMOVE
0.013	61	3127	25	0.008	0.41	GO:0046782	BP	2	regulation of viral transcription	6	physiology - virus	REMOVE
6.92E-10	97	3127	47	0.015	0.485	GO:0048524	BP	2	positive regulation of viral process	4	physiology - virus	REMOVE
0.00000208	52	3127	28	0.009	0.538	GO:1903902	BP	2	positive regulation of viral life cycle	5	physiology - virus	REMOVE
0.000000463	33	3127	22	0.007	0.667	GO:0045070	BP	2	positive regulation of viral genome replication	6	physiology - virus	REMOVE
1.68E-88	8474	3127	1914	0.612	0.226	GO:0050896	BP	2	response to stimulus	2	response to stimulus	RESPONSE TO STIMULUS
9.85E-56	1422	3127	473	0.151	0.333	GO:0009719	BP	2	response to endogenous stimulus	3	response to stimulus	RESPONSE TO STIMULUS
3.8E-54	1217	3127	421	0.135	0.346	GO:0071495	BP	2	cellular response to endogenous stimulus	4	response to stimulus	RESPONSE TO STIMULUS
4.06E-59	4088	3127	1039	0.332	0.254	GO:0042221	BP	2	response to chemical	3	response to stimulus	RESPONSE TO STIMULUS
1.6E-49	1014	3127	362	0.116	0.357	GO:1901698	BP	2	response to nitrogen compound	4	response to stimulus	RESPONSE TO STIMULUS
0.0164	117	3127	39	0.012	0.333	GO:0060359	BP	2	response to ammonium ion	5	response to stimulus	RESPONSE TO STIMULUS
0.00223	325	3127	88	0.028	0.271	GO:0001101	BP	2	response to acid chemical	4	response to stimulus	RESPONSE TO STIMULUS
2.34E-08	418	3127	124	0.04	0.297	GO:0042493	BP	2	response to drug	4	response to stimulus	RESPONSE TO STIMULUS
3.65E-18	482	3127	164	0.052	0.34	GO:0010035	BP	2	response to inorganic substance	4	response to stimulus	RESPONSE TO STIMULUS
0.0000344	312	3127	91	0.029	0.292	GO:0010038	BP	2	response to metal ion	5	response to stimulus	RESPONSE TO STIMULUS
0.0348	218	3127	61	0.02	0.28	GO:0009636	BP	2	response to toxic substance	4	response to stimulus	RESPONSE TO STIMULUS
1.17E-88	2838	3127	865	0.277	0.305	GO:0010033	BP	2	response to organic substance	4	response to stimulus	RESPONSE TO STIMULUS
0.0000368	178	3127	60	0.019	0.337	GO:1901654	BP	2	response to ketone	5	response to stimulus	RESPONSE TO STIMULUS
4.3E-26	889	3127	279	0.089	0.314	GO:0033993	BP	2	response to lipid	5	response to stimulus	RESPONSE TO STIMULUS
1.72E-35	933	3127	312	0.1	0.334	GO:0014070	BP	2	response to organic cyclic compound	5	response to stimulus	RESPONSE TO STIMULUS
0.0000278	84	3127	36	0.012	0.429	GO:0043331	BP	2	response to dsRNA	6	response to stimulus	RESPONSE TO STIMULUS
3.85E-08	46	3127	28	0.009	0.609	GO:1990089	BP	2	response to nerve growth factor	6	response to stimulus	RESPONSE TO STIMULUS
0.00127	212	3127	64	0.02	0.302	GO:0009743	BP	2	response to carbohydrate	5	response to stimulus	RESPONSE TO STIMULUS
0.00348	191	3127	58	0.019	0.304	GO:0034284	BP	2	response to monosaccharide	6	response to stimulus	RESPONSE TO STIMULUS
0.00255	185	3127	57	0.018	0.308	GO:0009746	BP	2	response to hexose	7	response to stimulus	RESPONSE TO STIMULUS
0.00224	180	3127	56	0.018	0.311	GO:0009749	BP	2	response to glucose	8	response to stimulus	RESPONSE TO STIMULUS
1.89E-42	907	3127	321	0.103	0.354	GO:0010243	BP	2	response to organonitrogen compound	5	response to stimulus	RESPONSE TO STIMULUS
0.00761	143	3127	46	0.015	0.322	GO:0043279	BP	2	response to alkaloid	6	response to stimulus	RESPONSE TO STIMULUS
6.34E-30	447	3127	179	0.057	0.4	GO:1901652	BP	2	response to peptide	6	response to stimulus	RESPONSE TO STIMULUS
0.000351	201	3127	63	0.02	0.313	GO:0097305	BP	2	response to alcohol	5	response to stimulus	RESPONSE TO STIMULUS
0.00306	160	3127	51	0.016	0.319	GO:0031960	BP	2	response to corticosteroid	7	response to stimulus	RESPONSE TO STIMULUS
6.38E-28	401	3127	163	0.052	0.406	GO:0043434	BP	2	response to peptide hormone	6	response to stimulus	RESPONSE TO STIMULUS
0.00723	63	3127	26	0.008	0.413	GO:0048678	BP	2	response to axon injury	5	response to stimulus	RESPONSE TO STIMULUS
1.65E-54	1160	3127	408	0.13	0.352	GO:0009628	BP	2	response to abiotic stimulus	3	response to stimulus	RESPONSE TO STIMULUS
1.96E-11	295	3127	103	0.033	0.349	GO:0009416	BP	2	response to light stimulus	5	response to stimulus	RESPONSE TO STIMULUS
4.49E-20	223	3127	100	0.032	0.448	GO:0009266	BP	2	response to temperature stimulus	4	response to stimulus	RESPONSE TO STIMULUS
3.89E-19	161	3127	80	0.026	0.497	GO:0009408	BP	2	response to heat	5	response to stimulus	RESPONSE TO STIMULUS
2.23E-08	870	3127	220	0.07	0.253	GO:0009607	BP	2	response to biotic stimulus	3	response to stimulus	RESPONSE TO STIMULUS
8.79E-22	2069	3127	514	0.164	0.248	GO:0009605	BP	2	response to external stimulus	3	response to stimulus	RESPONSE TO STIMULUS
1.29E-10	262	3127	93	0.03	0.355	GO:0071496	BP	2	cellular response to external stimulus	4	response to stimulus	RESPONSE TO STIMULUS
0.000000051	828	3127	210	0.067	0.254	GO:0043207	BP	2	response to external biotic stimulus	4	response to stimulus	RESPONSE TO STIMULUS
0.000000144	322	3127	100	0.032	0.311	GO:0002237	BP	2	response to molecule of bacterial origin	5	response to stimulus	RESPONSE TO STIMULUS
0.00000028	308	3127	96	0.031	0.312	GO:0032496	BP	2	response to lipopolysaccharide	6	response to stimulus	RESPONSE TO STIMULUS
0.0000124	434	3127	119	0.038	0.274	GO:0009991	BP	2	response to extracellular stimulus	4	response to stimulus	RESPONSE TO STIMULUS
0.0000362	404	3127	111	0.035	0.275	GO:0031667	BP	2	response to nutrient levels	5	response to stimulus	RESPONSE TO STIMULUS
0.0412	147	3127	45	0.014	0.306	GO:0042594	BP	2	response to starvation	6	response to stimulus	RESPONSE TO STIMULUS
0.000000971	204	3127	70	0.022	0.343	GO:0009612	BP	2	response to mechanical stimulus	4	response to stimulus	RESPONSE TO STIMULUS
4.53E-08	827	3127	210	0.067	0.254	GO:0051707	BP	2	response to other organism	3	response to stimulus	RESPONSE TO STIMULUS
6.96E-112	6938	3127	1715	0.548	0.247	GO:0051716	BP	2	cellular response to stimulus	3	response to stimulus	RESPONSE TO STIMULUS
7.72E-89	2688	3127	833	0.266	0.31	GO:0070887	BP	2	cellular response to chemical stimulus	4	response to stimulus	RESPONSE TO STIMULUS
7.27E-42	587	3127	238	0.076	0.405	GO:1901699	BP	2	cellular response to nitrogen compound	5	response to stimulus	RESPONSE TO STIMULUS
0.000000316	160	3127	60	0.019	0.375	GO:0071241	BP	2	cellular response to inorganic substance	5	response to stimulus	RESPONSE TO STIMULUS
0.00156	136	3127	46	0.015	0.338	GO:0071248	BP	2	cellular response to metal ion	6	response to stimulus	RESPONSE TO STIMULUS
2.19E-82	2224	3127	716	0.229	0.322	GO:0071310	BP	2	cellular response to organic substance	5	response to stimulus	RESPONSE TO STIMULUS
3.39E-25	541	3127	194	0.062	0.359	GO:0071396	BP	2	cellular response to lipid	6	response to stimulus	RESPONSE TO STIMULUS
3.46E-09	43	3127	28	0.009	0.651	GO:1990090	BP	2	cellular response to nerve growth factor stimulus	7	response to stimulus	RESPONSE TO STIMULUS
1.17E-35	539	3127	214	0.068	0.397	GO:0071407	BP	2	cellular response to organic cyclic compound	6	response to stimulus	RESPONSE TO STIMULUS
2.48E-08	51	3127	30	0.01	0.588	GO:0071359	BP	2	cellular response to dsRNA	7	response to stimulus	RESPONSE TO STIMULUS
5.2E-32	504	3127	198	0.063	0.393	GO:0071417	BP	2	cellular response to organonitrogen compound	6	response to stimulus	RESPONSE TO STIMULUS
2.96E-24	315	3127	133	0.043	0.422	GO:1901653	BP	2	cellular response to peptide	7	response to stimulus	RESPONSE TO STIMULUS
1.14E-16	288	3127	112	0.036	0.389	GO:0071214	BP	2	cellular response to abiotic stimulus	4	response to stimulus	RESPONSE TO STIMULUS
0.00004	107	3127	42	0.013	0.393	GO:0071482	BP	2	cellular response to light stimulus	6	response to stimulus	RESPONSE TO STIMULUS
0.000000073	74	3127	37	0.012	0.5	GO:0071260	BP	2	cellular response to mechanical stimulus	5	response to stimulus	RESPONSE TO STIMULUS
0.000000119	180	3127	66	0.021	0.367	GO:0071216	BP	2	cellular response to biotic stimulus	4	response to stimulus	RESPONSE TO STIMULUS
0.00000222	159	3127	58	0.019	0.365	GO:0071219	BP	2	cellular response to molecule of bacterial origin	5	response to stimulus	RESPONSE TO STIMULUS
0.00000123	153	3127	57	0.018	0.373	GO:0071222	BP	2	cellular response to lipopolysaccharide	6	response to stimulus	RESPONSE TO STIMULUS
4.82E-18	113	3127	63	0.02	0.558	GO:0034605	BP	2	cellular response to heat	5	response to stimulus	RESPONSE TO STIMULUS
0.0122	189	3127	56	0.018	0.296	GO:0031668	BP	2	cellular response to extracellular stimulus	4	response to stimulus	RESPONSE TO STIMULUS
0.00902	161	3127	50	0.016	0.311	GO:0031669	BP	2	cellular response to nutrient levels	5	response to stimulus	RESPONSE TO STIMULUS
2.33E-113	3650	3127	1093	0.35	0.299	GO:0048583	BP	2	regulation of response to stimulus	3	response to stimulus	RESPONSE TO STIMULUS
0.000000203	655	3127	172	0.055	0.263	GO:0032101	BP	2	regulation of response to external stimulus	4	response to stimulus	RESPONSE TO STIMULUS
3.83E-15	77	3127	47	0.015	0.61	GO:1900034	BP	2	regulation of cellular response to heat	5	response to stimulus	RESPONSE TO STIMULUS
5.14E-84	2054	3127	681	0.218	0.332	GO:0048584	BP	2	positive regulation of response to stimulus	3	response to stimulus	RESPONSE TO STIMULUS
3.72E-60	1360	3127	468	0.15	0.344	GO:0048585	BP	2	negative regulation of response to stimulus	3	response to stimulus	RESPONSE TO STIMULUS
5.96E-46	1496	3127	467	0.149	0.312	GO:1901700	BP	2	response to oxygen-containing compound	4	response to stimulus - oxygen	RESPONSE TO STIMULUS
2.48E-24	362	3127	146	0.047	0.403	GO:0070482	BP	2	response to oxygen levels	4	response to stimulus - oxygen	RESPONSE TO STIMULUS
3.78E-23	344	3127	139	0.044	0.404	GO:0036293	BP	2	response to decreased oxygen levels	5	response to stimulus - oxygen	RESPONSE TO STIMULUS
1.37E-21	336	3127	134	0.043	0.399	GO:0001666	BP	2	response to hypoxia	6	response to stimulus - oxygen	RESPONSE TO STIMULUS
2.39E-44	956	3127	337	0.108	0.353	GO:1901701	BP	2	cellular response to oxygen-containing compound	5	response to stimulus - oxygen	RESPONSE TO STIMULUS
3.01E-18	202	3127	91	0.029	0.45	GO:0071453	BP	2	cellular response to oxygen levels	5	response to stimulus - oxygen	RESPONSE TO STIMULUS
6.24E-17	192	3127	86	0.028	0.448	GO:0036294	BP	2	cellular response to decreased oxygen levels	6	response to stimulus - oxygen	RESPONSE TO STIMULUS
1.75E-14	185	3127	80	0.026	0.432	GO:0071456	BP	2	cellular response to hypoxia	5	response to stimulus - oxygen	RESPONSE TO STIMULUS
2.85E-95	3636	3127	1048	0.335	0.288	GO:0006950	BP	2	response to stress	3	response to stimulus - stress	RESPONSE TO STIMULUS
0.000489	81	3127	33	0.011	0.407	GO:0043149	BP	2	stress fiber assembly	9	response to stimulus - stress	RESPONSE TO STIMULUS
6.96E-109	1797	3127	669	0.214	0.372	GO:0033554	BP	2	cellular response to stress	4	response to stimulus - stress	RESPONSE TO STIMULUS
8.31E-77	1274	3127	480	0.154	0.377	GO:0080134	BP	2	regulation of response to stress	4	response to stimulus - stress	RESPONSE TO STIMULUS
0.0157	69	3127	27	0.009	0.391	GO:0051492	BP	2	regulation of stress fiber assembly	7	response to stimulus - stress	RESPONSE TO STIMULUS
6.02E-67	594	3127	280	0.09	0.471	GO:0080135	BP	2	regulation of cellular response to stress	4	response to stimulus - stress	RESPONSE TO STIMULUS
2.15E-29	253	3127	123	0.039	0.486	GO:0031098	BP	2	stress-activated protein kinase signaling cascade	6	response to stimulus - stress	RESPONSE TO STIMULUS
5.59E-21	198	3127	94	0.03	0.475	GO:0070302	BP	2	regulation of stress-activated protein kinase signaling cascade	7	response to stimulus - stress	RESPONSE TO STIMULUS
2.57E-10	139	3127	60	0.019	0.432	GO:0070304	BP	2	positive regulation of stress-activated protein kinase signaling cascade	6	response to stimulus - stress	RESPONSE TO STIMULUS
0.00448	41	3127	20	0.006	0.488	GO:0070303	BP	2	negative regulation of stress-activated protein kinase signaling cascade	6	response to stimulus - stress	RESPONSE TO STIMULUS
4.95E-17	263	3127	106	0.034	0.403	GO:0034976	BP	2	response to endoplasmic reticulum stress	5	response to stimulus - stress - ER stress	RESPONSE TO STIMULUS
0.0000204	35	3127	21	0.007	0.6	GO:1905898	BP	2	positive regulation of response to endoplasmic reticulum stress	4	response to stimulus - stress - ER stress	RESPONSE TO STIMULUS
0.000000224	73	3127	36	0.012	0.493	GO:1905897	BP	2	regulation of response to endoplasmic reticulum stress	5	response to stimulus - stress - ER stress	RESPONSE TO STIMULUS
3.16E-26	405	3127	161	0.051	0.398	GO:0006979	BP	2	response to oxidative stress	4	response to stimulus - stress - oxidative stress	RESPONSE TO STIMULUS
9.53E-19	220	3127	97	0.031	0.441	GO:0000302	BP	2	response to reactive oxygen species	5	response to stimulus - stress - oxidative stress	RESPONSE TO STIMULUS
8e-19	128	3127	69	0.022	0.539	GO:0042542	BP	2	response to hydrogen peroxide	6	response to stimulus - stress - oxidative stress	RESPONSE TO STIMULUS
1.01E-24	236	3127	111	0.035	0.47	GO:0034599	BP	2	cellular response to oxidative stress	5	response to stimulus - stress - oxidative stress	RESPONSE TO STIMULUS
4.64E-14	136	3127	65	0.021	0.478	GO:0034614	BP	2	cellular response to reactive oxygen species	6	response to stimulus - stress - oxidative stress	RESPONSE TO STIMULUS
3.61E-11	82	3127	44	0.014	0.537	GO:0070301	BP	2	cellular response to hydrogen peroxide	7	response to stimulus - stress - oxidative stress	RESPONSE TO STIMULUS
0.000000073	74	3127	37	0.012	0.5	GO:1902882	BP	2	regulation of response to oxidative stress	5	response to stimulus - stress - oxidative stress	RESPONSE TO STIMULUS
0.00321	34	3127	18	0.006	0.529	GO:1901031	BP	2	regulation of response to reactive oxygen species	6	response to stimulus - stress - oxidative stress	RESPONSE TO STIMULUS
1.54E-08	68	3127	36	0.012	0.529	GO:1900407	BP	2	regulation of cellular response to oxidative stress	5	response to stimulus - stress - oxidative stress	RESPONSE TO STIMULUS
0.000151	41	3127	22	0.007	0.537	GO:1902883	BP	2	negative regulation of response to oxidative stress	4	response to stimulus - stress - oxidative stress	RESPONSE TO STIMULUS
0.000151	41	3127	22	0.007	0.537	GO:1900408	BP	2	negative regulation of cellular response to oxidative stress	4	response to stimulus - stress - oxidative stress	RESPONSE TO STIMULUS
9.91E-19	432	3127	153	0.049	0.354	GO:0009314	BP	2	response to radiation	4	response to stimulus - stress - radiation	RESPONSE TO STIMULUS
2.47E-10	146	3127	62	0.02	0.425	GO:0010212	BP	2	response to ionizing radiation	5	response to stimulus - stress - radiation	RESPONSE TO STIMULUS
0.000000333	52	3127	29	0.009	0.558	GO:0010332	BP	2	response to gamma radiation	6	response to stimulus - stress - radiation	RESPONSE TO STIMULUS
1.05E-09	125	3127	55	0.018	0.44	GO:0009411	BP	2	response to UV	6	response to stimulus - stress - radiation	RESPONSE TO STIMULUS
2.94E-09	164	3127	65	0.021	0.396	GO:0071478	BP	2	cellular response to radiation	5	response to stimulus - stress - radiation	RESPONSE TO STIMULUS
0.00000143	67	3127	33	0.011	0.493	GO:0034644	BP	2	cellular response to UV	7	response to stimulus - stress - radiation	RESPONSE TO STIMULUS
0.00031	62	3127	28	0.009	0.452	GO:0071479	BP	2	cellular response to ionizing radiation	6	response to stimulus - stress - radiation	RESPONSE TO STIMULUS
0.00251	22	3127	14	0.004	0.636	GO:0071480	BP	2	cellular response to gamma radiation	7	response to stimulus - stress - radiation	RESPONSE TO STIMULUS
1.36E-09	223	3127	81	0.026	0.363	GO:0006403	BP	2	RNA localization	4	RNA metabolism	RNA METABOLISM
0.000348	130	3127	46	0.015	0.354	GO:0071166	BP	2	ribonucleoprotein complex localization	4	RNA metabolism	RNA METABOLISM
1.67E-22	456	3127	167	0.053	0.366	GO:0022613	BP	2	ribonucleoprotein complex biogenesis	4	RNA metabolism	RNA METABOLISM
4.17E-53	4590	3127	1115	0.357	0.243	GO:0016070	BP	2	RNA metabolic process	7	RNA metabolism	RNA METABOLISM
1.58E-13	289	3127	106	0.034	0.367	GO:0016072	BP	2	rRNA metabolic process	9	RNA metabolism	RNA METABOLISM
3.96E-36	698	3127	256	0.082	0.367	GO:0016071	BP	2	mRNA metabolic process	8	RNA metabolism	RNA METABOLISM
0.000248	45	3127	23	0.007	0.511	GO:0010501	BP	2	RNA secondary structure unwinding	8	RNA metabolism	RNA METABOLISM
3.81E-32	911	3127	299	0.096	0.328	GO:0006396	BP	2	RNA processing	8	RNA metabolism	RNA METABOLISM
2.65E-17	482	3127	162	0.052	0.336	GO:0006397	BP	2	mRNA processing	9	RNA metabolism	RNA METABOLISM
1.2E-12	257	3127	96	0.031	0.374	GO:0006364	BP	2	rRNA processing	10	RNA metabolism	RNA METABOLISM
2.49E-17	250	3127	103	0.033	0.412	GO:0006401	BP	2	RNA catabolic process	7	RNA metabolism	RNA METABOLISM
1.88E-30	3792	3127	881	0.282	0.232	GO:0032774	BP	2	RNA biosynthetic process	7	RNA metabolism	RNA METABOLISM
5.63E-15	59	3127	40	0.013	0.678	GO:0006278	BP	2	RNA-dependent DNA biosynthetic process	7	RNA metabolism	RNA METABOLISM
3.6E-11	203	3127	79	0.025	0.389	GO:0022618	BP	2	ribonucleoprotein complex assembly	7	RNA metabolism	RNA METABOLISM
3.7E-36	3736	3127	893	0.286	0.239	GO:0051252	BP	2	regulation of RNA metabolic process	6	RNA metabolism	RNA METABOLISM
1.28E-09	129	3127	56	0.018	0.434	GO:1903311	BP	2	regulation of mRNA metabolic process	7	RNA metabolism	RNA METABOLISM
0.00000357	100	3127	42	0.013	0.42	GO:0050684	BP	2	regulation of mRNA processing	8	RNA metabolism	RNA METABOLISM
9.23E-31	3626	3127	851	0.272	0.235	GO:2001141	BP	2	regulation of RNA biosynthetic process	7	RNA metabolism	RNA METABOLISM
2.91E-36	1397	3127	420	0.134	0.301	GO:0051254	BP	2	positive regulation of RNA metabolic process	6	RNA metabolism	RNA METABOLISM
0.000604	50	3127	24	0.008	0.48	GO:1903313	BP	2	positive regulation of mRNA metabolic process	7	RNA metabolism	RNA METABOLISM
7.27E-32	1347	3127	397	0.127	0.295	GO:1902680	BP	2	positive regulation of RNA biosynthetic process	6	RNA metabolism	RNA METABOLISM
6.13E-17	220	3127	94	0.03	0.427	GO:0006402	BP	2	mRNA catabolic process	6	RNA metabolism	RNA METABOLISM
1.02E-15	206	3127	88	0.028	0.427	GO:0000956	BP	2	nuclear-transcribed mRNA catabolic process	7	RNA metabolism	RNA METABOLISM
1.25E-25	1204	3127	348	0.111	0.289	GO:0051253	BP	2	negative regulation of RNA metabolic process	6	RNA metabolism	RNA METABOLISM
0.0000414	36	3127	21	0.007	0.583	GO:1903312	BP	2	negative regulation of mRNA metabolic process	7	RNA metabolism	RNA METABOLISM
0.00177	30	3127	17	0.005	0.567	GO:0050686	BP	2	negative regulation of mRNA processing	8	RNA metabolism	RNA METABOLISM
3.62E-22	1164	3127	329	0.105	0.283	GO:1902679	BP	2	negative regulation of RNA biosynthetic process	7	RNA metabolism	RNA METABOLISM
5.07E-67	5259	3127	1285	0.411	0.244	GO:0010467	BP	2	gene expression	5	RNA metabolism - gene expression	RNA METABOLISM
2.47E-59	4408	3127	1101	0.352	0.25	GO:0010468	BP	2	regulation of gene expression	5	RNA metabolism - gene expression	RNA METABOLISM
0.000000173	263	3127	86	0.028	0.327	GO:0040029	BP	2	regulation of gene expression, epigenetic	6	RNA metabolism - gene expression	RNA METABOLISM
7.21E-41	466	3127	203	0.065	0.436	GO:0010608	BP	2	posttranscriptional regulation of gene expression	6	RNA metabolism - gene expression	RNA METABOLISM
0.00000352	56	3127	29	0.009	0.518	GO:0032922	BP	2	circadian regulation of gene expression	6	RNA metabolism - gene expression	RNA METABOLISM
1.25E-44	1691	3127	507	0.162	0.3	GO:0010628	BP	2	positive regulation of gene expression	5	RNA metabolism - gene expression	RNA METABOLISM
1.38E-47	1625	3127	500	0.16	0.308	GO:0010629	BP	2	negative regulation of gene expression	5	RNA metabolism - gene expression	RNA METABOLISM
0.000217	251	3127	75	0.024	0.299	GO:0016458	BP	2	gene silencing	6	RNA metabolism - gene expression - gene silencing	RNA METABOLISM
0.00491	158	3127	50	0.016	0.316	GO:0031047	BP	2	gene silencing by RNA	7	RNA metabolism - gene expression - gene silencing	RNA METABOLISM
0.000201	61	3127	28	0.009	0.459	GO:0060968	BP	2	regulation of gene silencing	7	RNA metabolism - gene expression - gene silencing	RNA METABOLISM
0.000000946	63	3127	32	0.01	0.508	GO:0016441	BP	2	posttranscriptional gene silencing	7	RNA metabolism - gene expression - gene silencing	RNA METABOLISM
0.00000295	62	3127	31	0.01	0.5	GO:0035194	BP	2	posttranscriptional gene silencing by RNA	8	RNA metabolism - gene expression - gene silencing	RNA METABOLISM
0.0000019	58	3127	30	0.01	0.517	GO:0035195	BP	2	gene silencing by miRNA	7	RNA metabolism - gene expression - gene silencing	RNA METABOLISM
0.000961	32	3127	18	0.006	0.562	GO:0035196	BP	2	production of miRNAs involved in gene silencing by miRNA	8	RNA metabolism - gene expression - gene silencing	RNA METABOLISM
0.0373	20	3127	12	0.004	0.6	GO:1902895	BP	2	positive regulation of pri-miRNA transcription from RNA polymerase II promoter	10	RNA metabolism - sncRNA	RNA METABOLISM
7.95E-11	556	3127	162	0.052	0.291	GO:0034660	BP	2	ncRNA metabolic process	8	RNA metabolism - sncRNA	RNA METABOLISM
1.31E-10	391	3127	124	0.04	0.317	GO:0034470	BP	2	ncRNA processing	9	RNA metabolism - sncRNA	RNA METABOLISM
0.000272	33	3127	19	0.006	0.576	GO:0070918	BP	2	production of small RNA involved in gene silencing by RNA	8	RNA metabolism - sncRNA	RNA METABOLISM
2.24E-18	419	3127	149	0.048	0.356	GO:0008380	BP	2	RNA splicing	9	RNA metabolism - splicing	RNA METABOLISM
9.83E-17	322	3127	121	0.039	0.376	GO:0000375	BP	2	RNA splicing, via transesterification reactions	10	RNA metabolism - splicing	RNA METABOLISM
4e-17	319	3127	121	0.039	0.379	GO:0000377	BP	2	RNA splicing, via transesterification reactions with bulged adenosine as nucleophile	11	RNA metabolism - splicing	RNA METABOLISM
4e-17	319	3127	121	0.039	0.379	GO:0000398	BP	2	mRNA splicing, via spliceosome	10	RNA metabolism - splicing	RNA METABOLISM
0.000000281	104	3127	45	0.014	0.433	GO:0043484	BP	2	regulation of RNA splicing	7	RNA metabolism - splicing	RNA METABOLISM
0.00000233	68	3127	33	0.011	0.485	GO:0048024	BP	2	regulation of mRNA splicing, via spliceosome	8	RNA metabolism - splicing	RNA METABOLISM
0.00602	26	3127	15	0.005	0.577	GO:0033119	BP	2	negative regulation of RNA splicing	7	RNA metabolism - splicing	RNA METABOLISM
0.00108	21	3127	14	0.004	0.667	GO:0048025	BP	2	negative regulation of mRNA splicing, via spliceosome	8	RNA metabolism - splicing	RNA METABOLISM
0.000272	33	3127	19	0.006	0.576	GO:0031050	BP	2	dsRNA fragmentation	8	RNA metabolism - stability	RNA METABOLISM
8.48E-18	151	3127	75	0.024	0.497	GO:0043487	BP	2	regulation of RNA stability	7	RNA metabolism - stability	RNA METABOLISM
0.000000112	34	3127	23	0.007	0.676	GO:0043489	BP	2	RNA stabilization	8	RNA metabolism - stability	RNA METABOLISM
3.06E-16	142	3127	70	0.022	0.493	GO:0043488	BP	2	regulation of mRNA stability	8	RNA metabolism - stability	RNA METABOLISM
0.00000077	31	3127	21	0.007	0.677	GO:0048255	BP	2	mRNA stabilization	9	RNA metabolism - stability	RNA METABOLISM
3.12E-15	121	3127	62	0.02	0.512	GO:0000184	BP	2	nuclear-transcribed mRNA catabolic process, nonsense-mediated decay	8	RNA metabolism - stability	RNA METABOLISM
9.63E-31	3775	3127	879	0.281	0.233	GO:0097659	BP	2	nucleic acid-templated transcription	8	RNA metabolism - transcription	RNA METABOLISM
1.4E-29	3758	3127	871	0.279	0.232	GO:0006351	BP	2	transcription, DNA-templated	6	RNA metabolism - transcription	RNA METABOLISM
6.89E-31	3618	3127	850	0.272	0.235	GO:1903506	BP	2	regulation of nucleic acid-templated transcription	8	RNA metabolism - transcription	RNA METABOLISM
1.68E-29	3595	3127	840	0.269	0.234	GO:0006355	BP	2	regulation of transcription, DNA-templated	9	RNA metabolism - transcription	RNA METABOLISM
6.06E-32	1346	3127	397	0.127	0.295	GO:1903508	BP	2	positive regulation of nucleic acid-templated transcription	7	RNA metabolism - transcription	RNA METABOLISM
6.06E-32	1346	3127	397	0.127	0.295	GO:0045893	BP	2	positive regulation of transcription, DNA-templated	8	RNA metabolism - transcription	RNA METABOLISM
2.62E-22	1162	3127	329	0.105	0.283	GO:1903507	BP	2	negative regulation of nucleic acid-templated transcription	8	RNA metabolism - transcription	RNA METABOLISM
1.48E-20	1122	3127	315	0.101	0.281	GO:0045892	BP	2	negative regulation of transcription, DNA-templated	9	RNA metabolism - transcription	RNA METABOLISM
1.17E-33	2076	3127	557	0.178	0.268	GO:0006366	BP	2	transcription from RNA polymerase II promoter	7	RNA metabolism - transcription - pol II promoter	RNA METABOLISM
0.0000481	175	3127	59	0.019	0.337	GO:0006367	BP	2	transcription initiation from RNA polymerase II promoter	8	RNA metabolism - transcription - pol II promoter	RNA METABOLISM
1.78E-32	1877	3127	512	0.164	0.273	GO:0006357	BP	2	regulation of transcription from RNA polymerase II promoter	10	RNA metabolism - transcription - pol II promoter	RNA METABOLISM
3.93E-11	114	3127	54	0.017	0.474	GO:0043618	BP	2	regulation of transcription from RNA polymerase II promoter in response to stress	11	RNA metabolism - transcription - pol II promoter	RNA METABOLISM
0.00000364	79	3127	36	0.012	0.456	GO:0061418	BP	2	regulation of transcription from RNA polymerase II promoter in response to hypoxia	12	RNA metabolism - transcription - pol II promoter	RNA METABOLISM
3.28E-21	1048	3127	301	0.096	0.287	GO:0045944	BP	2	positive regulation of transcription from RNA polymerase II promoter	9	RNA metabolism - transcription - pol II promoter	RNA METABOLISM
3e-20	750	3127	232	0.074	0.309	GO:0000122	BP	2	negative regulation of transcription from RNA polymerase II promoter	10	RNA metabolism - transcription - pol II promoter	RNA METABOLISM
0.000247	30	3127	18	0.006	0.6	GO:0061614	BP	2	pri-miRNA transcription from RNA polymerase II promoter	8	RNA metabolism - transcription - pol II promoter	RNA METABOLISM
0.000444	28	3127	17	0.005	0.607	GO:1902893	BP	2	regulation of pri-miRNA transcription from RNA polymerase II promoter	11	RNA metabolism - transcription - pol II promoter	RNA METABOLISM
1.68E-31	368	3127	160	0.051	0.435	GO:0051090	BP	2	regulation of sequence-specific DNA binding transcription factor activity	10	RNA metabolism - transcription - transcription factors	RNA METABOLISM
3.48E-24	232	3127	109	0.035	0.47	GO:0051091	BP	2	positive regulation of sequence-specific DNA binding transcription factor activity	3	RNA metabolism - transcription - transcription factors	RNA METABOLISM
2.49E-18	133	3127	70	0.022	0.526	GO:0051092	BP	2	positive regulation of NF-kappaB transcription factor activity	4	RNA metabolism - transcription - transcription factors	RNA METABOLISM
0.0000698	132	3127	48	0.015	0.364	GO:0043433	BP	2	negative regulation of sequence-specific DNA binding transcription factor activity	3	RNA metabolism - transcription - transcription factors	RNA METABOLISM
0.0113	68	3127	27	0.009	0.397	GO:0032088	BP	2	negative regulation of NF-kappaB transcription factor activity	4	RNA metabolism - transcription - transcription factors	RNA METABOLISM
3.76E-13	316	3127	112	0.036	0.354	GO:0042254	BP	2	ribosome biogenesis	5	RNA metabolism - translation	RNA METABOLISM
1.41E-36	624	3127	238	0.076	0.381	GO:0006412	BP	2	translation	6	RNA metabolism - translation	RNA METABOLISM
0.0376	53	3127	22	0.007	0.415	GO:0002181	BP	2	cytoplasmic translation	7	RNA metabolism - translation	RNA METABOLISM
1.88E-22	191	3127	94	0.03	0.492	GO:0006413	BP	2	translational initiation	4	RNA metabolism - translation	RNA METABOLISM
3.76E-28	338	3127	146	0.047	0.432	GO:0006417	BP	2	regulation of translation	6	RNA metabolism - translation	RNA METABOLISM
0.000206	75	3127	32	0.01	0.427	GO:0006446	BP	2	regulation of translational initiation	7	RNA metabolism - translation	RNA METABOLISM
1.32E-09	105	3127	49	0.016	0.467	GO:0045727	BP	2	positive regulation of translation	6	RNA metabolism - translation	RNA METABOLISM
1.76E-13	149	3127	68	0.022	0.456	GO:0017148	BP	2	negative regulation of translation	6	RNA metabolism - translation	RNA METABOLISM
0.000319	231	3127	70	0.022	0.303	GO:0019932	BP	2	second-messenger-mediated signaling	6	response to stimulus - signalling	SIGNALLING
0.000409	151	3127	51	0.016	0.338	GO:0019722	BP	2	calcium-mediated signaling	7	response to stimulus - signalling	SIGNALLING
0.0015	8	3127	8	0.003	1	GO:0007172	BP	2	signal complex assembly	6	response to stimulus - signalling	SIGNALLING
8.47E-90	6275	3127	1538	0.492	0.245	GO:0023052	BP	2	signaling	2	response to stimulus - signalling	SIGNALLING
1.96E-88	6263	3127	1532	0.49	0.245	GO:0044700	BP	2	single organism signaling	3	response to stimulus - signalling	SIGNALLING
2.54E-88	6287	3127	1536	0.491	0.244	GO:0007154	BP	2	cell communication	3	response to stimulus - signalling	SIGNALLING
1.24E-18	1551	3127	398	0.127	0.257	GO:0007267	BP	2	cell-cell signaling	4	response to stimulus - signalling	SIGNALLING
0.000198	416	3127	111	0.035	0.267	GO:0023061	BP	2	signal release	5	response to stimulus - signalling	SIGNALLING
0.00237	82	3127	32	0.01	0.39	GO:0031623	BP	2	receptor internalization	6	response to stimulus - signalling	SIGNALLING
3.09E-108	3061	3127	957	0.306	0.313	GO:0023051	BP	2	regulation of signaling	3	response to stimulus - signalling	SIGNALLING
5.49E-108	3008	3127	945	0.302	0.314	GO:0010646	BP	2	regulation of cell communication	4	response to stimulus - signalling	SIGNALLING
2.31E-91	5778	3127	1452	0.464	0.251	GO:0007165	BP	2	signal transduction	4	response to stimulus - signalling	SIGNALLING
2.54E-09	71	3127	38	0.012	0.535	GO:0038034	BP	2	signal transduction in absence of ligand	5	response to stimulus - signalling	SIGNALLING
8.45E-25	273	3127	122	0.039	0.447	GO:0030522	BP	2	intracellular receptor signaling pathway	5	response to stimulus - signalling	SIGNALLING
0.000000642	36	3127	23	0.007	0.639	GO:0035872	BP	2	nucleotide-binding domain, leucine rich repeat containing receptor signaling pathway	6	response to stimulus - signalling	SIGNALLING
3e-70	2710	3127	793	0.254	0.293	GO:0007166	BP	2	cell surface receptor signaling pathway	5	response to stimulus - signalling	SIGNALLING
2.84E-20	578	3127	192	0.061	0.332	GO:1905114	BP	2	cell surface receptor signaling pathway involved in cell-cell signaling	6	response to stimulus - signalling	SIGNALLING
1.76E-73	972	3127	396	0.127	0.407	GO:0007167	BP	2	enzyme linked receptor protein signaling pathway	6	response to stimulus - signalling	SIGNALLING
5.77E-12	88	3127	47	0.015	0.534	GO:0048013	BP	2	ephrin receptor signaling pathway	8	response to stimulus - signalling	SIGNALLING
3.99E-135	2633	3127	916	0.293	0.348	GO:0035556	BP	2	intracellular signal transduction	5	response to stimulus - signalling	SIGNALLING
3.72E-12	257	3127	95	0.03	0.37	GO:0072331	BP	2	signal transduction by p53 class mediator	6	response to stimulus - signalling	SIGNALLING
1.03E-20	206	3127	96	0.031	0.466	GO:0048017	BP	2	inositol lipid-mediated signaling	6	response to stimulus - signalling	SIGNALLING
5.49E-20	203	3127	94	0.03	0.463	GO:0048015	BP	2	phosphatidylinositol-mediated signaling	7	response to stimulus - signalling	SIGNALLING
7.1E-107	2704	3127	876	0.28	0.324	GO:0009966	BP	2	regulation of signal transduction	5	response to stimulus - signalling	SIGNALLING
1.23E-79	1673	3127	583	0.186	0.348	GO:1902531	BP	2	regulation of intracellular signal transduction	6	response to stimulus - signalling	SIGNALLING
0.000000105	164	3127	62	0.02	0.378	GO:1901796	BP	2	regulation of signal transduction by p53 class mediator	7	response to stimulus - signalling	SIGNALLING
0.000589	128	3127	45	0.014	0.352	GO:0010469	BP	2	regulation of receptor activity	6	response to stimulus - signalling	SIGNALLING
2.26E-76	1521	3127	540	0.173	0.355	GO:0010647	BP	2	positive regulation of cell communication	4	response to stimulus - signalling	SIGNALLING
2.07E-77	1529	3127	544	0.174	0.356	GO:0023056	BP	2	positive regulation of signaling	3	response to stimulus - signalling	SIGNALLING
7.14E-80	1387	3127	514	0.164	0.371	GO:0009967	BP	2	positive regulation of signal transduction	4	response to stimulus - signalling	SIGNALLING
3.09E-51	857	3127	326	0.104	0.38	GO:1902533	BP	2	positive regulation of intracellular signal transduction	5	response to stimulus - signalling	SIGNALLING
5.21E-14	120	3127	60	0.019	0.5	GO:0002223	BP	2	stimulatory C-type lectin receptor signaling pathway	9	response to stimulus - signalling	SIGNALLING
4.7E-11	174	3127	71	0.023	0.408	GO:0002221	BP	2	pattern recognition receptor signaling pathway	8	response to stimulus - signalling	SIGNALLING
0.000000183	57	3127	31	0.01	0.544	GO:0002753	BP	2	cytoplasmic pattern recognition receptor signaling pathway	9	response to stimulus - signalling	SIGNALLING
5.54E-60	1200	3127	429	0.137	0.357	GO:0010648	BP	2	negative regulation of cell communication	4	response to stimulus - signalling	SIGNALLING
5.4E-60	1204	3127	430	0.138	0.357	GO:0023057	BP	2	negative regulation of signaling	3	response to stimulus - signalling	SIGNALLING
1.05E-59	1097	3127	403	0.129	0.367	GO:0009968	BP	2	negative regulation of signal transduction	4	response to stimulus - signalling	SIGNALLING
3.34E-31	457	3127	184	0.059	0.403	GO:1902532	BP	2	negative regulation of intracellular signal transduction	5	response to stimulus - signalling	SIGNALLING
0.00913	7	3127	7	0.002	1	GO:0060368	BP	2	regulation of Fc receptor mediated stimulatory signaling pathway	9	response to stimulus - signalling - Fc	SIGNALLING
6.97E-31	243	3127	122	0.039	0.502	GO:0038093	BP	2	Fc receptor signaling pathway	7	response to stimulus - signalling - Fc	SIGNALLING
5.41E-17	178	3127	82	0.026	0.461	GO:0038095	BP	2	Fc-epsilon receptor signaling pathway	8	response to stimulus - signalling - Fc	SIGNALLING
1.06E-08	131	3127	55	0.018	0.42	GO:0038094	BP	2	Fc-gamma receptor signaling pathway	8	response to stimulus - signalling - Fc	SIGNALLING
9.09E-09	127	3127	54	0.017	0.425	GO:0038096	BP	2	Fc-gamma receptor signaling pathway involved in phagocytosis	9	response to stimulus - signalling - Fc	SIGNALLING
9.49E-11	133	3127	59	0.019	0.444	GO:0002431	BP	2	Fc receptor mediated stimulatory signaling pathway	8	response to stimulus - signalling - Fc	SIGNALLING
0.0292	35	3127	17	0.005	0.486	GO:1901186	BP	2	positive regulation of ERBB signaling pathway	5	response to stimulus - signalling - ERBB	SIGNALLING
2.43E-38	143	3127	96	0.031	0.671	GO:0038127	BP	2	ERBB signaling pathway	8	response to stimulus - signalling - ERBB	SIGNALLING
3.61E-13	39	3127	30	0.01	0.769	GO:0038128	BP	2	ERBB2 signaling pathway	9	response to stimulus - signalling - ERBB	SIGNALLING
3.3E-17	90	3127	54	0.017	0.6	GO:1901184	BP	2	regulation of ERBB signaling pathway	6	response to stimulus - signalling - ERBB	SIGNALLING
6.38E-16	52	3127	38	0.012	0.731	GO:1901185	BP	2	negative regulation of ERBB signaling pathway	5	response to stimulus - signalling - ERBB	SIGNALLING
1.05E-09	258	3127	90	0.029	0.349	GO:0070371	BP	2	ERK1 and ERK2 cascade	7	response to stimulus - signalling - ERK	SIGNALLING
5.12E-09	244	3127	85	0.027	0.348	GO:0070372	BP	2	regulation of ERK1 and ERK2 cascade	8	response to stimulus - signalling - ERK	SIGNALLING
0.000198	177	3127	58	0.019	0.328	GO:0070374	BP	2	positive regulation of ERK1 and ERK2 cascade	9	response to stimulus - signalling - ERK	SIGNALLING
0.00193	56	3127	25	0.008	0.446	GO:0070373	BP	2	negative regulation of ERK1 and ERK2 cascade	7	response to stimulus - signalling - ERK	SIGNALLING
1.78E-10	212	3127	80	0.026	0.377	GO:0071559	BP	2	response to transforming growth factor beta	6	response to stimulus - signalling - growth factor	SIGNALLING
3.09E-10	210	3127	79	0.025	0.376	GO:0071560	BP	2	cellular response to transforming growth factor beta stimulus	7	response to stimulus - signalling - growth factor	SIGNALLING
5.63E-09	166	3127	65	0.021	0.392	GO:0007179	BP	2	transforming growth factor beta receptor signaling pathway	8	response to stimulus - signalling - growth factor	SIGNALLING
0.00000112	48	3127	27	0.009	0.562	GO:0048008	BP	2	platelet-derived growth factor receptor signaling pathway	8	response to stimulus - signalling - growth factor	SIGNALLING
1.1E-18	91	3127	56	0.018	0.615	GO:0048010	BP	2	vascular endothelial growth factor receptor signaling pathway	8	response to stimulus - signalling - growth factor	SIGNALLING
1.62E-33	122	3127	83	0.027	0.68	GO:0007173	BP	2	epidermal growth factor receptor signaling pathway	9	response to stimulus - signalling - growth factor	SIGNALLING
0.00000969	34	3127	21	0.007	0.618	GO:0038179	BP	2	neurotrophin signaling pathway	6	response to stimulus - signalling - growth factor	SIGNALLING
8.11E-15	78	3127	47	0.015	0.603	GO:0042058	BP	2	regulation of epidermal growth factor receptor signaling pathway	7	response to stimulus - signalling - growth factor	SIGNALLING
0.000427	237	3127	71	0.023	0.3	GO:0090287	BP	2	regulation of cellular response to growth factor stimulus	4	response to stimulus - signalling - growth factor	SIGNALLING
0.000281	98	3127	38	0.012	0.388	GO:1903844	BP	2	regulation of cellular response to transforming growth factor beta stimulus	5	response to stimulus - signalling - growth factor	SIGNALLING
1.71E-11	40	3127	29	0.009	0.725	GO:0042059	BP	2	negative regulation of epidermal growth factor receptor signaling pathway	6	response to stimulus - signalling - growth factor	SIGNALLING
1.33E-33	643	3127	237	0.076	0.369	GO:0070848	BP	2	response to growth factor	5	response to stimulus - signalling - growth factor	SIGNALLING
1.34E-10	42	3127	29	0.009	0.69	GO:0070849	BP	2	response to epidermal growth factor	6	response to stimulus - signalling - growth factor	SIGNALLING
1.19E-32	619	3127	229	0.073	0.37	GO:0071363	BP	2	cellular response to growth factor stimulus	6	response to stimulus - signalling - growth factor	SIGNALLING
3.34E-10	38	3127	27	0.009	0.711	GO:0071364	BP	2	cellular response to epidermal growth factor stimulus	7	response to stimulus - signalling - growth factor	SIGNALLING
2.6E-19	592	3127	193	0.062	0.326	GO:0007264	BP	2	small GTPase mediated signal transduction	6	response to stimulus - signalling - GTPase	SIGNALLING
3.26E-16	330	3127	122	0.039	0.37	GO:0007265	BP	2	Ras protein signal transduction	7	response to stimulus - signalling - GTPase	SIGNALLING
0.006	32	3127	17	0.005	0.531	GO:0016601	BP	2	Rac protein signal transduction	8	response to stimulus - signalling - GTPase	SIGNALLING
0.000103	305	3127	88	0.028	0.289	GO:0051056	BP	2	regulation of small GTPase mediated signal transduction	7	response to stimulus - signalling - GTPase	SIGNALLING
0.00677	208	3127	61	0.02	0.293	GO:0046578	BP	2	regulation of Ras protein signal transduction	8	response to stimulus - signalling - GTPase	SIGNALLING
0.0000204	35	3127	21	0.007	0.6	GO:0035329	BP	2	hippo signaling	6	response to stimulus - signalling - hippo	SIGNALLING
0.0212	41	3127	19	0.006	0.463	GO:0033574	BP	2	response to testosterone	6	response to stimulus - signalling - hormone	SIGNALLING
0.0129	16	3127	11	0.004	0.688	GO:0042921	BP	2	glucocorticoid receptor signaling pathway	9	response to stimulus - signalling - hormone	SIGNALLING
0.0000298	129	3127	48	0.015	0.372	GO:0032355	BP	2	response to estradiol	6	response to stimulus - signalling - hormone	SIGNALLING
1.12E-36	847	3127	294	0.094	0.347	GO:0009725	BP	2	response to hormone	5	response to stimulus - signalling - hormone	SIGNALLING
6.41E-18	383	3127	139	0.044	0.363	GO:0048545	BP	2	response to steroid hormone	6	response to stimulus - signalling - hormone	SIGNALLING
0.00941	144	3127	46	0.015	0.319	GO:0051384	BP	2	response to glucocorticoid	8	response to stimulus - signalling - hormone	SIGNALLING
0.00947	36	3127	18	0.006	0.5	GO:0060416	BP	2	response to growth hormone	7	response to stimulus - signalling - hormone	SIGNALLING
8.83E-34	618	3127	231	0.074	0.374	GO:0032870	BP	2	cellular response to hormone stimulus	6	response to stimulus - signalling - hormone	SIGNALLING
8.03E-17	246	3127	101	0.032	0.411	GO:0071383	BP	2	cellular response to steroid hormone stimulus	7	response to stimulus - signalling - hormone	SIGNALLING
3.68E-23	293	3127	125	0.04	0.427	GO:0071375	BP	2	cellular response to peptide hormone stimulus	8	response to stimulus - signalling - hormone	SIGNALLING
0.0111	24	3127	14	0.004	0.583	GO:0071378	BP	2	cellular response to growth hormone stimulus	9	response to stimulus - signalling - hormone	SIGNALLING
0.0204	22	3127	13	0.004	0.591	GO:0060396	BP	2	growth hormone receptor signaling pathway	8	response to stimulus - signalling - hormone	SIGNALLING
2.97E-13	222	3127	88	0.028	0.396	GO:0009755	BP	2	hormone-mediated signaling pathway	5	response to stimulus - signalling - hormone	SIGNALLING
7.93E-15	183	3127	80	0.026	0.437	GO:0043401	BP	2	steroid hormone mediated signaling pathway	6	response to stimulus - signalling - hormone	SIGNALLING
7.41E-15	129	3127	64	0.02	0.496	GO:0030518	BP	2	intracellular steroid hormone receptor signaling pathway	7	response to stimulus - signalling - hormone	SIGNALLING
0.00762	18	3127	12	0.004	0.667	GO:0031958	BP	2	corticosteroid receptor signaling pathway	8	response to stimulus - signalling - hormone	SIGNALLING
0.0473	50	3127	21	0.007	0.42	GO:0030520	BP	2	intracellular estrogen receptor signaling pathway	8	response to stimulus - signalling - hormone	SIGNALLING
5.25E-08	64	3127	34	0.011	0.531	GO:0030521	BP	2	androgen receptor signaling pathway	8	response to stimulus - signalling - hormone	SIGNALLING
0.000000161	66	3127	34	0.011	0.515	GO:0033143	BP	2	regulation of intracellular steroid hormone receptor signaling pathway	8	response to stimulus - signalling - hormone	SIGNALLING
0.0332	32	3127	16	0.005	0.5	GO:0033146	BP	2	regulation of intracellular estrogen receptor signaling pathway	9	response to stimulus - signalling - hormone	SIGNALLING
0.0196	31	3127	16	0.005	0.516	GO:0033144	BP	2	negative regulation of intracellular steroid hormone receptor signaling pathway	5	response to stimulus - signalling - hormone	SIGNALLING
1.05E-23	248	3127	113	0.036	0.456	GO:0032868	BP	2	response to insulin	7	response to stimulus - signalling - insulin	SIGNALLING
7.45E-21	192	3127	92	0.029	0.479	GO:0032869	BP	2	cellular response to insulin stimulus	9	response to stimulus - signalling - insulin	SIGNALLING
3.1E-14	119	3127	60	0.019	0.504	GO:0008286	BP	2	insulin receptor signaling pathway	8	response to stimulus - signalling - insulin	SIGNALLING
1.1E-10	66	3127	38	0.012	0.576	GO:1900076	BP	2	regulation of cellular response to insulin stimulus	4	response to stimulus - signalling - insulin	SIGNALLING
0.000000162	48	3127	28	0.009	0.583	GO:0046626	BP	2	regulation of insulin receptor signaling pathway	5	response to stimulus - signalling - insulin	SIGNALLING
0.0000076	31	3127	20	0.006	0.645	GO:1900077	BP	2	negative regulation of cellular response to insulin stimulus	4	response to stimulus - signalling - insulin	SIGNALLING
0.000013	29	3127	19	0.006	0.655	GO:0046627	BP	2	negative regulation of insulin receptor signaling pathway	5	response to stimulus - signalling - insulin	SIGNALLING
1.43E-16	194	3127	86	0.028	0.443	GO:0007254	BP	2	JNK cascade	8	response to stimulus - signalling - JNK	SIGNALLING
5.3E-13	162	3127	71	0.023	0.438	GO:0046328	BP	2	regulation of JNK cascade	9	response to stimulus - signalling - JNK	SIGNALLING
6.66E-08	118	3127	50	0.016	0.424	GO:0046330	BP	2	positive regulation of JNK cascade	10	response to stimulus - signalling - JNK	SIGNALLING
0.00000304	82	3127	37	0.012	0.451	GO:0043506	BP	2	regulation of JUN kinase activity	10	response to stimulus - signalling - JUN	SIGNALLING
0.0000321	67	3127	31	0.01	0.463	GO:0043507	BP	2	positive regulation of JUN kinase activity	10	response to stimulus - signalling - JUN	SIGNALLING
0.000282	36	3127	20	0.006	0.556	GO:0007257	BP	2	activation of JUN kinase activity	11	response to stimulus - signalling - JUN	SIGNALLING
0.000000262	312	3127	97	0.031	0.311	GO:0007178	BP	2	transmembrane receptor protein serine/threonine kinase signaling pathway	7	response to stimulus - signalling - kinase	SIGNALLING
9.67E-76	676	3127	317	0.101	0.469	GO:0007169	BP	2	transmembrane receptor protein tyrosine kinase signaling pathway	7	response to stimulus - signalling - kinase	SIGNALLING
3.17E-11	162	3127	68	0.022	0.42	GO:0014065	BP	2	phosphatidylinositol 3-kinase signaling	8	response to stimulus - signalling - kinase	SIGNALLING
0.00000274	148	3127	55	0.018	0.372	GO:0043491	BP	2	protein kinase B signaling	6	response to stimulus - signalling - kinase	SIGNALLING
0.000202	124	3127	45	0.014	0.363	GO:0051896	BP	2	regulation of protein kinase B signaling	7	response to stimulus - signalling - kinase	SIGNALLING
6.16E-65	892	3127	360	0.115	0.404	GO:0023014	BP	2	signal transduction by protein phosphorylation	5	response to stimulus - signalling - kinase	SIGNALLING
1.16E-23	290	3127	125	0.04	0.431	GO:0032147	BP	2	activation of protein kinase activity	9	response to stimulus - signalling - kinase	SIGNALLING
4.1E-60	856	3127	342	0.109	0.4	GO:0000165	BP	2	MAPK cascade	6	response to stimulus - signalling - MAPK	SIGNALLING
0.000961	32	3127	18	0.006	0.562	GO:0038066	BP	2	p38MAPK cascade	8	response to stimulus - signalling - MAPK	SIGNALLING
7.02E-41	658	3127	255	0.082	0.388	GO:0043408	BP	2	regulation of MAPK cascade	7	response to stimulus - signalling - MAPK	SIGNALLING
4.37E-31	325	3127	147	0.047	0.452	GO:0043405	BP	2	regulation of MAP kinase activity	8	response to stimulus - signalling - MAPK	SIGNALLING
0.0392	26	3127	14	0.004	0.538	GO:1900744	BP	2	regulation of p38MAPK cascade	9	response to stimulus - signalling - MAPK	SIGNALLING
6.27E-26	472	3127	178	0.057	0.377	GO:0043410	BP	2	positive regulation of MAPK cascade	8	response to stimulus - signalling - MAPK	SIGNALLING
3.16E-23	254	3127	114	0.036	0.449	GO:0043406	BP	2	positive regulation of MAP kinase activity	9	response to stimulus - signalling - MAPK	SIGNALLING
0.0000121	52	3127	27	0.009	0.519	GO:0000186	BP	2	activation of MAPKK activity	10	response to stimulus - signalling - MAPK	SIGNALLING
2.54E-12	145	3127	65	0.021	0.448	GO:0000187	BP	2	activation of MAPK activity	10	response to stimulus - signalling - MAPK	SIGNALLING
7.33E-14	147	3127	68	0.022	0.463	GO:0043409	BP	2	negative regulation of MAPK cascade	6	response to stimulus - signalling - MAPK	SIGNALLING
0.000978	72	3127	30	0.01	0.417	GO:0043407	BP	2	negative regulation of MAP kinase activity	7	response to stimulus - signalling - MAPK	SIGNALLING
2.26E-28	248	3127	120	0.038	0.484	GO:0051403	BP	2	stress-activated MAPK cascade	7	response to stimulus - signalling - MAPK	SIGNALLING
1.65E-20	197	3127	93	0.03	0.472	GO:0032872	BP	2	regulation of stress-activated MAPK cascade	8	response to stimulus - signalling - MAPK	SIGNALLING
6.85E-10	138	3127	59	0.019	0.428	GO:0032874	BP	2	positive regulation of stress-activated MAPK cascade	9	response to stimulus - signalling - MAPK	SIGNALLING
0.00448	41	3127	20	0.006	0.488	GO:0032873	BP	2	negative regulation of stress-activated MAPK cascade	7	response to stimulus - signalling - MAPK	SIGNALLING
0.000000275	35	3127	23	0.007	0.657	GO:0070423	BP	2	nucleotide-binding oligomerization domain containing signaling pathway	10	response to stimulus - signalling - NOD	SIGNALLING
0.0000569	594	3127	150	0.048	0.253	GO:0007268	BP	2	chemical synaptic transmission	8	response to stimulus - signalling - synaptic	SIGNALLING
0.0000405	596	3127	151	0.048	0.253	GO:0099536	BP	2	synaptic signaling	5	response to stimulus - signalling - synaptic	SIGNALLING
0.0000405	596	3127	151	0.048	0.253	GO:0099537	BP	2	trans-synaptic signaling	6	response to stimulus - signalling - synaptic	SIGNALLING
0.00000631	298	3127	90	0.029	0.302	GO:0050804	BP	2	modulation of synaptic transmission	5	response to stimulus - signalling - synaptic	SIGNALLING
0.0000708	148	3127	52	0.017	0.351	GO:0048167	BP	2	regulation of synaptic plasticity	6	response to stimulus - signalling - synaptic	SIGNALLING
0.000885	146	3127	49	0.016	0.336	GO:0099531	BP	2	presynaptic process involved in chemical synaptic transmission	2	response to stimulus - signalling - synaptic	SIGNALLING
0.00411	136	3127	45	0.014	0.331	GO:0007269	BP	2	neurotransmitter secretion	3	response to stimulus - signalling - synaptic	SIGNALLING
0.000672	97	3127	37	0.012	0.381	GO:0017015	BP	2	regulation of transforming growth factor beta receptor signaling pathway	6	response to stimulus - signalling - TGF	SIGNALLING
0.00117	95	3127	36	0.012	0.379	GO:0031929	BP	2	TOR signaling	6	response to stimulus - signalling - TOR	SIGNALLING
0.0000903	26	3127	17	0.005	0.654	GO:0048011	BP	2	neurotrophin TRK receptor signaling pathway	7	response to stimulus - signalling - TRK	SIGNALLING
0.00835	39	3127	19	0.006	0.487	GO:0035924	BP	2	cellular response to vascular endothelial growth factor stimulus	7	response to stimulus - signalling - VEGF	SIGNALLING
6.33E-25	472	3127	176	0.056	0.373	GO:0198738	BP	2	cell-cell signaling by wnt	5	response to stimulus - signalling - Wnt	SIGNALLING
4.72E-25	471	3127	176	0.056	0.374	GO:0016055	BP	2	Wnt signaling pathway	7	response to stimulus - signalling - Wnt	SIGNALLING
2.59E-11	288	3127	101	0.032	0.351	GO:0060070	BP	2	canonical Wnt signaling pathway	8	response to stimulus - signalling - Wnt	SIGNALLING
1.53E-09	151	3127	62	0.02	0.411	GO:0035567	BP	2	non-canonical Wnt signaling pathway	8	response to stimulus - signalling - Wnt	SIGNALLING
0.000000705	110	3127	46	0.015	0.418	GO:0060071	BP	2	Wnt signaling pathway, planar cell polarity pathway	9	response to stimulus - signalling - Wnt	SIGNALLING
1.57E-15	312	3127	116	0.037	0.372	GO:0030111	BP	2	regulation of Wnt signaling pathway	6	response to stimulus - signalling - Wnt	SIGNALLING
1.31E-11	238	3127	89	0.028	0.374	GO:0060828	BP	2	regulation of canonical Wnt signaling pathway	7	response to stimulus - signalling - Wnt	SIGNALLING
0.0000146	154	3127	55	0.018	0.357	GO:0030177	BP	2	positive regulation of Wnt signaling pathway	5	response to stimulus - signalling - Wnt	SIGNALLING
0.000198	120	3127	44	0.014	0.367	GO:0090263	BP	2	positive regulation of canonical Wnt signaling pathway	6	response to stimulus - signalling - Wnt	SIGNALLING
1.75E-11	197	3127	78	0.025	0.396	GO:0030178	BP	2	negative regulation of Wnt signaling pathway	5	response to stimulus - signalling - Wnt	SIGNALLING
6.03E-10	163	3127	66	0.021	0.405	GO:0090090	BP	2	negative regulation of canonical Wnt signaling pathway	6	response to stimulus - signalling - Wnt	SIGNALLING
4.46E-10	144	3127	61	0.02	0.424	GO:0014066	BP	2	regulation of phosphatidylinositol 3-kinase signaling	7	response to stimulus - signalling -kinase	SIGNALLING
0.00142	24	3127	15	0.005	0.625	GO:0007176	BP	2	regulation of epidermal growth factor-activated receptor activity	8	response to stimulus- signalling - EGF	SIGNALLING
0.0177	34	3127	17	0.005	0.5	GO:0045742	BP	2	positive regulation of epidermal growth factor receptor signaling pathway	6	response to stimulus- signalling - EGF	SIGNALLING
0.00104	65	3127	28	0.009	0.431	GO:0014068	BP	2	positive regulation of phosphatidylinositol 3-kinase signaling	6	response to stimulus- signalling - PI3K	SIGNALLING
0.0497	122	3127	39	0.012	0.32	GO:0007259	BP	2	JAK-STAT cascade	7	response to stimulus- signalling - STAT	SIGNALLING
0.0497	122	3127	39	0.012	0.32	GO:0097696	BP	2	STAT cascade	6	response to stimulus- signalling - STAT	SIGNALLING
0.00211	10	3127	9	0.003	0.9	GO:0042532	BP	2	negative regulation of tyrosine phosphorylation of STAT protein	1	response to stimulus- signalling - STAT	SIGNALLING
0.00000177	135	3127	52	0.017	0.385	GO:0097479	BP	2	synaptic vesicle localization	6	synapse	SYNAPSE
0.000000448	127	3127	51	0.016	0.402	GO:0097480	BP	2	establishment of synaptic vesicle localization	6	synapse	SYNAPSE
2.01E-14	240	3127	95	0.03	0.396	GO:0051650	BP	2	establishment of vesicle localization	5	synapse	SYNAPSE
0.00919	183	3127	55	0.018	0.301	GO:0001505	BP	2	regulation of neurotransmitter levels	4	synapse	SYNAPSE
0.00411	136	3127	45	0.014	0.331	GO:0099643	BP	2	signal release from synapse	6	synapse	SYNAPSE
0.00507	38	3127	19	0.006	0.5	GO:0098693	BP	2	regulation of synaptic vesicle cycle	5	synapse	SYNAPSE
0.022	48	3127	21	0.007	0.438	GO:0098900	BP	2	regulation of action potential	1	synapse	SYNAPSE
0.00194	12	3127	10	0.003	0.833	GO:0046929	BP	2	negative regulation of neurotransmitter secretion	1	synapse	SYNAPSE
0.000618	78	3127	32	0.01	0.41	GO:0016079	BP	2	synaptic vesicle exocytosis	3	synapse	SYNAPSE
0.0000479	515	3127	134	0.043	0.26	GO:0002790	BP	2	peptide secretion	6	exocytosis	TRANSPORT
0.0000202	414	3127	114	0.036	0.275	GO:0002791	BP	2	regulation of peptide secretion	6	exocytosis	TRANSPORT
0.000313	106	3127	40	0.013	0.377	GO:1903305	BP	2	regulation of regulated secretory pathway	6	exocytosis	TRANSPORT
0.0103	64	3127	26	0.008	0.406	GO:0017158	BP	2	regulation of calcium ion-dependent exocytosis	7	exocytosis	TRANSPORT
0.0109	103	3127	36	0.012	0.35	GO:0017156	BP	2	calcium ion regulated exocytosis	7	exocytosis	TRANSPORT
0.0129	76	3127	29	0.009	0.382	GO:0045921	BP	2	positive regulation of exocytosis	6	exocytosis	TRANSPORT
2.29E-53	4993	3127	1191	0.381	0.239	GO:0006810	BP	2	transport	4	transport	TRANSPORT
3.07E-39	2680	3127	698	0.223	0.26	GO:0071702	BP	2	organic substance transport	5	transport	TRANSPORT
1.06E-49	2297	3127	651	0.208	0.283	GO:0071705	BP	2	nitrogen compound transport	5	transport	TRANSPORT
4.22E-57	2019	3127	611	0.195	0.303	GO:0042886	BP	2	amide transport	6	transport	TRANSPORT
1.86E-58	1999	3127	610	0.195	0.305	GO:0015833	BP	2	peptide transport	7	transport	TRANSPORT
0.00018	228	3127	70	0.022	0.307	GO:0015931	BP	2	nucleobase-containing compound transport	6	transport	TRANSPORT
7.7E-26	3111	3127	733	0.234	0.236	GO:0044765	BP	2	single-organism transport	4	transport	TRANSPORT
0.0224	188	3127	55	0.018	0.293	GO:0008643	BP	2	carbohydrate transport	5	transport	TRANSPORT
0.0000412	158	3127	55	0.018	0.348	GO:0015749	BP	2	monosaccharide transport	6	transport	TRANSPORT
0.0000246	156	3127	55	0.018	0.353	GO:0008645	BP	2	hexose transport	7	transport	TRANSPORT
0.0000146	154	3127	55	0.018	0.357	GO:0015758	BP	2	glucose transport	8	transport	TRANSPORT
0.000000516	78	3127	37	0.012	0.474	GO:0046323	BP	2	glucose import	9	transport	TRANSPORT
8.73E-37	1782	3127	505	0.161	0.283	GO:0051049	BP	2	regulation of transport	4	transport	TRANSPORT
5.26E-26	765	3127	250	0.08	0.327	GO:0090087	BP	2	regulation of peptide transport	5	transport	TRANSPORT
0.0000147	104	3127	42	0.013	0.404	GO:0010827	BP	2	regulation of glucose transport	5	transport	TRANSPORT
0.00000051	65	3127	33	0.011	0.508	GO:0046324	BP	2	regulation of glucose import	6	transport	TRANSPORT
2.11E-14	168	3127	75	0.024	0.446	GO:1904589	BP	2	regulation of protein import	7	transport	TRANSPORT
5.25E-27	905	3127	285	0.091	0.315	GO:0051050	BP	2	positive regulation of transport	3	transport	TRANSPORT
0.00209	46	3127	22	0.007	0.478	GO:0010828	BP	2	positive regulation of glucose transport	4	transport	TRANSPORT
0.00145	42	3127	21	0.007	0.5	GO:0046326	BP	2	positive regulation of glucose import	5	transport	TRANSPORT
0.00000305	96	3127	41	0.013	0.427	GO:1904591	BP	2	positive regulation of protein import	5	transport	TRANSPORT
1.21E-10	447	3127	137	0.044	0.306	GO:0051051	BP	2	negative regulation of transport	3	transport	TRANSPORT
0.00031	62	3127	28	0.009	0.452	GO:1904590	BP	2	negative regulation of protein import	5	transport	TRANSPORT
9.68E-60	1962	3127	605	0.193	0.308	GO:0015031	BP	2	protein transport	5	transport	TRANSPORT
0.00457	124	3127	42	0.013	0.339	GO:1903169	BP	2	regulation of calcium ion transmembrane transport	3	transport	TRANSPORT
1.27E-13	125	3127	61	0.02	0.488	GO:0099111	BP	2	microtubule-based transport	5	transport	TRANSPORT
1.36E-17	1511	3127	386	0.123	0.255	GO:0046903	BP	2	secretion	5	transport - exocytosis	TRANSPORT
5.01E-17	1384	3127	358	0.114	0.259	GO:0032940	BP	2	secretion by cell	4	transport - exocytosis	TRANSPORT
1.64E-15	847	3127	240	0.077	0.283	GO:0006887	BP	2	exocytosis	5	transport - exocytosis	TRANSPORT
6.25E-13	732	3127	207	0.066	0.283	GO:0045055	BP	2	regulated exocytosis	6	transport - exocytosis	TRANSPORT
3.5E-10	671	3127	185	0.059	0.276	GO:0051046	BP	2	regulation of secretion	5	transport - exocytosis	TRANSPORT
2.19E-09	618	3127	171	0.055	0.277	GO:1903530	BP	2	regulation of secretion by cell	4	transport - exocytosis	TRANSPORT
0.0000228	387	3127	108	0.035	0.279	GO:0050708	BP	2	regulation of protein secretion	5	transport - exocytosis	TRANSPORT
0.000000135	161	3127	61	0.02	0.379	GO:0017157	BP	2	regulation of exocytosis	5	transport - exocytosis	TRANSPORT
0.000252	352	3127	97	0.031	0.276	GO:0051047	BP	2	positive regulation of secretion	4	transport - exocytosis	TRANSPORT
0.0001	323	3127	92	0.029	0.285	GO:1903532	BP	2	positive regulation of secretion by cell	5	transport - exocytosis	TRANSPORT
0.0000331	190	3127	63	0.02	0.332	GO:0050657	BP	2	nucleic acid transport	7	transport - intracellular	TRANSPORT
0.0000331	190	3127	63	0.02	0.332	GO:0050658	BP	2	RNA transport	8	transport - intracellular	TRANSPORT
7.84E-85	1861	3127	638	0.204	0.343	GO:0046907	BP	2	intracellular transport	4	transport - intracellular	TRANSPORT
0.00000101	137	3127	53	0.017	0.387	GO:0016482	BP	2	cytosolic transport	5	transport - intracellular	TRANSPORT
5.06E-59	1159	3127	417	0.133	0.36	GO:0006886	BP	2	intracellular protein transport	5	transport - intracellular	TRANSPORT
2.37E-41	732	3127	275	0.088	0.376	GO:1902582	BP	2	single-organism intracellular transport	5	transport - intracellular	TRANSPORT
1.27E-13	125	3127	61	0.02	0.488	GO:0010970	BP	2	transport along microtubule	6	transport - intracellular	TRANSPORT
1.43E-37	541	3127	218	0.07	0.403	GO:0032386	BP	2	regulation of intracellular transport	5	transport - intracellular	TRANSPORT
2.31E-26	736	3127	244	0.078	0.332	GO:0051223	BP	2	regulation of protein transport	6	transport - intracellular	TRANSPORT
1.1E-20	369	3127	141	0.045	0.382	GO:0033157	BP	2	regulation of intracellular protein transport	6	transport - intracellular	TRANSPORT
1.08E-22	792	3127	248	0.079	0.313	GO:0051270	BP	2	regulation of cellular component movement	4	transport - intracellular	TRANSPORT
2.3E-14	411	3127	138	0.044	0.336	GO:0051272	BP	2	positive regulation of cellular component movement	4	transport - intracellular	TRANSPORT
1.14E-21	328	3127	132	0.042	0.402	GO:0032388	BP	2	positive regulation of intracellular transport	4	transport - intracellular	TRANSPORT
9.78E-14	451	3127	146	0.047	0.324	GO:0051222	BP	2	positive regulation of protein transport	4	transport - intracellular	TRANSPORT
1.56E-12	254	3127	95	0.03	0.374	GO:0090316	BP	2	positive regulation of intracellular protein transport	4	transport - intracellular	TRANSPORT
0.000000319	126	3127	51	0.016	0.405	GO:0032387	BP	2	negative regulation of intracellular transport	4	transport - intracellular	TRANSPORT
0.000016	191	3127	64	0.02	0.335	GO:0051224	BP	2	negative regulation of protein transport	4	transport - intracellular	TRANSPORT
0.000047	89	3127	37	0.012	0.416	GO:0090317	BP	2	negative regulation of intracellular protein transport	4	transport - intracellular	TRANSPORT
0.0000237	47	3127	25	0.008	0.532	GO:0008088	BP	2	axo-dendritic transport	7	transport - intracellular - axonal	TRANSPORT
0.00161	39	3127	20	0.006	0.513	GO:0098930	BP	2	axonal transport	8	transport - intracellular - axonal	TRANSPORT
6.04E-11	68	3127	39	0.012	0.574	GO:0072384	BP	2	organelle transport along microtubule	7	transport - intracellular - cytoskeletal	TRANSPORT
1.13E-17	142	3127	72	0.023	0.507	GO:0030705	BP	2	cytoskeleton-dependent intracellular transport	5	transport - intracellular - cytoskeletal	TRANSPORT
0.00732	126	3127	42	0.013	0.333	GO:0030048	BP	2	actin filament-based movement	5	transport - intracellular - cytoskeletal	TRANSPORT
3.23E-16	250	3127	101	0.032	0.404	GO:0007018	BP	2	microtubule-based movement	4	transport - intracellular - cytoskeletal	TRANSPORT
0.0105	33	3127	17	0.005	0.515	GO:0001881	BP	2	receptor recycling	4	transport - intracellular - endocytosis	TRANSPORT
0.00000108	337	3127	101	0.032	0.3	GO:0006898	BP	2	receptor-mediated endocytosis	7	transport - intracellular - endocytosis	TRANSPORT
0.000175	54	3127	26	0.008	0.481	GO:0072583	BP	2	clathrin-dependent endocytosis	8	transport - intracellular - endocytosis	TRANSPORT
2.78E-08	255	3127	86	0.028	0.337	GO:0016197	BP	2	endosomal transport	5	transport - intracellular - endocytosis	TRANSPORT
5.15E-10	204	3127	77	0.025	0.377	GO:0030100	BP	2	regulation of endocytosis	5	transport - intracellular - endocytosis	TRANSPORT
0.000432	77	3127	32	0.01	0.416	GO:0048259	BP	2	regulation of receptor-mediated endocytosis	6	transport - intracellular - endocytosis	TRANSPORT
0.0000586	112	3127	43	0.014	0.384	GO:0045807	BP	2	positive regulation of endocytosis	4	transport - intracellular - endocytosis	TRANSPORT
1e-21	716	3127	228	0.073	0.318	GO:0006897	BP	2	endocytosis	6	transport - intracellular - endocytosis	TRANSPORT
0.0000204	336	3127	97	0.031	0.289	GO:0048193	BP	2	Golgi vesicle transport	6	transport - intracellular - golgi - vesicle	TRANSPORT
0.00171	81	3127	32	0.01	0.395	GO:0007041	BP	2	lysosomal transport	6	transport - intracellular - lysosomal	TRANSPORT
8.06E-33	175	3127	102	0.033	0.583	GO:0022406	BP	2	membrane docking	4	transport - intracellular - MEMBRANE	TRANSPORT
0.00000297	294	3127	90	0.029	0.306	GO:0006839	BP	2	mitochondrial transport	5	transport - intracellular - mitochondria	TRANSPORT
0.00299	17	3127	12	0.004	0.706	GO:0034643	BP	2	establishment of mitochondrion localization, microtubule-mediated	5	transport - intracellular - mitochondria	TRANSPORT
0.00299	17	3127	12	0.004	0.706	GO:0047497	BP	2	mitochondrion transport along microtubule	6	transport - intracellular - mitochondria	TRANSPORT
0.00104	16	3127	12	0.004	0.75	GO:0090670	BP	2	RNA localization to Cajal body	5	transport - intracellular - nuclear	TRANSPORT
9.58E-33	469	3127	190	0.061	0.405	GO:0051169	BP	2	nuclear transport	5	transport - intracellular - nuclear	TRANSPORT
7.77E-33	461	3127	188	0.06	0.408	GO:0006913	BP	2	nucleocytoplasmic transport	6	transport - intracellular - nuclear	TRANSPORT
3.78E-20	272	3127	114	0.036	0.419	GO:1902593	BP	2	single-organism nuclear import	6	transport - intracellular - nuclear	TRANSPORT
0.00475	15	3127	11	0.004	0.733	GO:1904872	BP	2	regulation of telomerase RNA localization to Cajal body	4	transport - intracellular - nuclear	TRANSPORT
6.95E-18	204	3127	91	0.029	0.446	GO:0046822	BP	2	regulation of nucleocytoplasmic transport	6	transport - intracellular - nuclear	TRANSPORT
3.93E-11	114	3127	54	0.017	0.474	GO:0046824	BP	2	positive regulation of nucleocytoplasmic transport	5	transport - intracellular - nuclear	TRANSPORT
0.00475	15	3127	11	0.004	0.733	GO:1904874	BP	2	positive regulation of telomerase RNA localization to Cajal body	3	transport - intracellular - nuclear	TRANSPORT
0.000172	71	3127	31	0.01	0.437	GO:0046823	BP	2	negative regulation of nucleocytoplasmic transport	5	transport - intracellular - nuclear	TRANSPORT
1.61E-08	177	3127	67	0.021	0.379	GO:0006611	BP	2	protein export from nucleus	6	transport - intracellular - nuclear - nuclear export	TRANSPORT
2.59E-09	194	3127	73	0.023	0.376	GO:0051168	BP	2	nuclear export	7	transport - intracellular - nuclear - nuclear export	TRANSPORT
0.00128	127	3127	44	0.014	0.346	GO:0071426	BP	2	ribonucleoprotein complex export from nucleus	7	transport - intracellular - nuclear - nuclear export	TRANSPORT
0.0156	37	3127	18	0.006	0.486	GO:0046825	BP	2	regulation of protein export from nucleus	7	transport - intracellular - nuclear - nuclear export	TRANSPORT
0.00314	139	3127	46	0.015	0.331	GO:0006405	BP	2	RNA export from nucleus	8	transport - intracellular - nuclear - nuclear export - RNA	TRANSPORT
4.73E-20	269	3127	113	0.036	0.42	GO:0006606	BP	2	protein import into nucleus	6	transport - intracellular - nuclear - nuclear import	TRANSPORT
9.64E-21	290	3127	120	0.038	0.414	GO:0051170	BP	2	nuclear import	7	transport - intracellular - nuclear - nuclear import	TRANSPORT
0.000000411	91	3127	41	0.013	0.451	GO:0042991	BP	2	transcription factor import into nucleus	7	transport - intracellular - nuclear - nuclear import	TRANSPORT
0.00615	45	3127	21	0.007	0.467	GO:0000060	BP	2	protein import into nucleus, translocation	7	transport - intracellular - nuclear - nuclear import	TRANSPORT
2.54E-14	165	3127	74	0.024	0.448	GO:0042306	BP	2	regulation of protein import into nucleus	8	transport - intracellular - nuclear - nuclear import	TRANSPORT
0.00000114	90	3127	40	0.013	0.444	GO:0042990	BP	2	regulation of transcription factor import into nucleus	9	transport - intracellular - nuclear - nuclear import	TRANSPORT
0.0397	23	3127	13	0.004	0.565	GO:0007184	BP	2	SMAD protein import into nucleus	8	transport - intracellular - nuclear - nuclear import	TRANSPORT
0.0000014	94	3127	41	0.013	0.436	GO:0042307	BP	2	positive regulation of protein import into nucleus	5	transport - intracellular - nuclear - nuclear import	TRANSPORT
0.0325	49	3127	21	0.007	0.429	GO:0042993	BP	2	positive regulation of transcription factor import into nucleus	6	transport - intracellular - nuclear - nuclear import	TRANSPORT
0.00031	62	3127	28	0.009	0.452	GO:0042308	BP	2	negative regulation of protein import into nucleus	5	transport - intracellular - nuclear - nuclear import	TRANSPORT
0.0135	40	3127	19	0.006	0.475	GO:0042992	BP	2	negative regulation of transcription factor import into nucleus	6	transport - intracellular - nuclear - nuclear import	TRANSPORT
8.83E-14	256	3127	98	0.031	0.383	GO:0051648	BP	2	vesicle localization	5	transport - intracellular - vesicle	TRANSPORT
0.00000026	378	3127	112	0.036	0.296	GO:0016050	BP	2	vesicle organization	5	transport - intracellular - vesicle	TRANSPORT
2.87E-35	1917	3127	529	0.169	0.276	GO:0016192	BP	2	vesicle-mediated transport	5	transport - intracellular - vesicle	TRANSPORT
0.00448	41	3127	20	0.006	0.488	GO:0099518	BP	2	vesicle cytoskeletal trafficking	6	transport - intracellular - vesicle	TRANSPORT
0.00379	107	3127	38	0.012	0.355	GO:0007034	BP	2	vacuolar transport	5	transport - intracellular - vesicle	TRANSPORT
0.0156	37	3127	18	0.006	0.486	GO:0047496	BP	2	vesicle transport along microtubule	8	transport - intracellular - vesicle	TRANSPORT
1.62E-18	446	3127	156	0.05	0.35	GO:0060627	BP	2	regulation of vesicle-mediated transport	4	transport - intracellular - vesicle	TRANSPORT
0.000572	325	3127	90	0.029	0.277	GO:0010959	BP	2	regulation of metal ion transport	1	transport - ion	TRANSPORT
0.0123	207	3127	60	0.019	0.29	GO:0051924	BP	2	regulation of calcium ion transport	2	transport - ion	TRANSPORT
0.0244	90	3127	32	0.01	0.356	GO:0010522	BP	2	regulation of calcium ion transport into cytosol	3	transport - ion	TRANSPORT
0.0396	72	3127	27	0.009	0.375	GO:0051279	BP	2	regulation of release of sequestered calcium ion into cytosol	1	transport - ion	TRANSPORT
0.029	185	3127	54	0.017	0.292	GO:0006836	BP	2	neurotransmitter transport	5	transport - synapse	TRANSPORT
0.0000569	594	3127	150	0.048	0.253	GO:0098916	BP	2	anterograde trans-synaptic signaling	7	transport - synapse	TRANSPORT
0.000000448	127	3127	51	0.016	0.402	GO:0099003	BP	2	vesicle-mediated transport in synapse	6	transport - synaptic	TRANSPORT
0.0000354	118	3127	45	0.014	0.381	GO:0099504	BP	2	synaptic vesicle cycle	5	transport - synaptic	TRANSPORT
0.000000448	127	3127	51	0.016	0.402	GO:0048489	BP	2	synaptic vesicle transport	6	transport - synaptic	TRANSPORT
0.0251	38	3127	18	0.006	0.474	GO:0036465	BP	2	synaptic vesicle recycling	7	transport - synaptic	TRANSPORT
0.0258	63	3127	25	0.008	0.397	GO:0051588	BP	2	regulation of neurotransmitter transport	5	transport - synaptic	TRANSPORT
0.000148	35	3127	20	0.006	0.571	GO:1902803	BP	2	regulation of synaptic vesicle transport	5	transport - synaptic	TRANSPORT
0.000305	15	3127	12	0.004	0.8	GO:0051589	BP	2	negative regulation of neurotransmitter transport	4	transport - synaptic	TRANSPORT
0.0311	17	3127	11	0.004	0.647	GO:0090083	BP	2	regulation of inclusion body assembly	5	waste disposal	WASTE DISPOSAL
2.23E-23	449	3127	167	0.053	0.372	GO:0006914	BP	2	autophagy	5	waste disposal - autophagy	WASTE DISPOSAL
4.6E-15	258	3127	101	0.032	0.391	GO:0016236	BP	2	macroautophagy	6	waste disposal - autophagy	WASTE DISPOSAL
1.13E-21	277	3127	118	0.038	0.426	GO:0010506	BP	2	regulation of autophagy	6	waste disposal - autophagy	WASTE DISPOSAL
6.72E-12	137	3127	62	0.02	0.453	GO:0016241	BP	2	regulation of macroautophagy	7	waste disposal - autophagy	WASTE DISPOSAL
1.1E-10	103	3127	50	0.016	0.485	GO:0010508	BP	2	positive regulation of autophagy	6	waste disposal - autophagy	WASTE DISPOSAL
0.000000331	58	3127	31	0.01	0.534	GO:0016239	BP	2	positive regulation of macroautophagy	7	waste disposal - autophagy	WASTE DISPOSAL
0.00475	15	3127	11	0.004	0.733	GO:0098779	BP	2	positive regulation of macromitophagy in response to mitochondrial depolarization	9	waste disposal - autophagy - mitophagy	WASTE DISPOSAL
0.00182	19	3127	13	0.004	0.684	GO:1904923	BP	2	regulation of mitophagy in response to mitochondrial depolarization	8	waste disposal - autophagy - mitophagy	WASTE DISPOSAL
0.00182	19	3127	13	0.004	0.684	GO:1901524	BP	2	regulation of macromitophagy	8	waste disposal - autophagy - mitophagy	WASTE DISPOSAL
0.00475	15	3127	11	0.004	0.733	GO:1901526	BP	2	positive regulation of macromitophagy	8	waste disposal - autophagy - mitophagy	WASTE DISPOSAL
0.00182	19	3127	13	0.004	0.684	GO:1904925	BP	2	positive regulation of mitophagy in response to mitochondrial depolarization	8	waste disposal - autophagy - mitophagy	WASTE DISPOSAL
0.000000817	79	3127	37	0.012	0.468	GO:0000422	BP	2	mitophagy	7	waste disposal - autophagy - mitophagy	WASTE DISPOSAL
0.00182	19	3127	13	0.004	0.684	GO:0000423	BP	2	macromitophagy	8	waste disposal - autophagy - mitophagy	WASTE DISPOSAL
0.000000099	56	3127	31	0.01	0.554	GO:1903146	BP	2	regulation of mitophagy	7	waste disposal - autophagy - mitophagy	WASTE DISPOSAL
0.00000318	25	3127	18	0.006	0.72	GO:1903599	BP	2	positive regulation of mitophagy	7	waste disposal - autophagy - mitophagy	WASTE DISPOSAL
0.00048	310	3127	87	0.028	0.281	GO:0006909	BP	2	phagocytosis	5	waste disposal - phagocytosis	WASTE DISPOSAL
2.87E-20	816	3127	247	0.079	0.303	GO:0016567	BP	2	protein ubiquitination	9	waste disposal - ubiquitin-proteasome	WASTE DISPOSAL
2.54E-08	288	3127	94	0.03	0.326	GO:0000209	BP	2	protein polyubiquitination	10	waste disposal - ubiquitin-proteasome	WASTE DISPOSAL
0.0024	43	3127	21	0.007	0.488	GO:0070534	BP	2	protein K63-linked ubiquitination	11	waste disposal - ubiquitin-proteasome	WASTE DISPOSAL
2.96E-23	296	3127	126	0.04	0.426	GO:0016579	BP	2	protein deubiquitination	9	waste disposal - ubiquitin-proteasome	WASTE DISPOSAL
3.76E-25	405	3127	159	0.051	0.393	GO:0010498	BP	2	proteasomal protein catabolic process	8	waste disposal - ubiquitin-proteasome	WASTE DISPOSAL
9.71E-27	568	3127	204	0.065	0.359	GO:0006511	BP	2	ubiquitin-dependent protein catabolic process	9	waste disposal - ubiquitin-proteasome	WASTE DISPOSAL
2.52E-22	376	3127	146	0.047	0.388	GO:0043161	BP	2	proteasome-mediated ubiquitin-dependent protein catabolic process	10	waste disposal - ubiquitin-proteasome	WASTE DISPOSAL
4.81E-09	200	3127	74	0.024	0.37	GO:0042787	BP	2	protein ubiquitination involved in ubiquitin-dependent protein catabolic process	10	waste disposal - ubiquitin-proteasome	WASTE DISPOSAL
1.15E-26	253	3127	119	0.038	0.47	GO:0031396	BP	2	regulation of protein ubiquitination	8	waste disposal - ubiquitin-proteasome	WASTE DISPOSAL
0.0000002	121	3127	50	0.016	0.413	GO:0051438	BP	2	regulation of ubiquitin-protein transferase activity	9	waste disposal - ubiquitin-proteasome	WASTE DISPOSAL
0.00196	89	3127	34	0.011	0.382	GO:1904666	BP	2	regulation of ubiquitin protein ligase activity	10	waste disposal - ubiquitin-proteasome	WASTE DISPOSAL
3.38E-20	147	3127	77	0.025	0.524	GO:0061136	BP	2	regulation of proteasomal protein catabolic process	8	waste disposal - ubiquitin-proteasome	WASTE DISPOSAL
6.89E-15	110	3127	58	0.019	0.527	GO:0032434	BP	2	regulation of proteasomal ubiquitin-dependent protein catabolic process	9	waste disposal - ubiquitin-proteasome	WASTE DISPOSAL
3.04E-08	102	3127	46	0.015	0.451	GO:2000058	BP	2	regulation of protein ubiquitination involved in ubiquitin-dependent protein catabolic process	8	waste disposal - ubiquitin-proteasome	WASTE DISPOSAL
5.41E-17	178	3127	82	0.026	0.461	GO:0031398	BP	2	positive regulation of protein ubiquitination	8	waste disposal - ubiquitin-proteasome	WASTE DISPOSAL
0.0000207	105	3127	42	0.013	0.4	GO:0051443	BP	2	positive regulation of ubiquitin-protein transferase activity	9	waste disposal - ubiquitin-proteasome	WASTE DISPOSAL
0.00184	85	3127	33	0.011	0.388	GO:1904668	BP	2	positive regulation of ubiquitin protein ligase activity	10	waste disposal - ubiquitin-proteasome	WASTE DISPOSAL
1e-10	90	3127	46	0.015	0.511	GO:1901800	BP	2	positive regulation of proteasomal protein catabolic process	8	waste disposal - ubiquitin-proteasome	WASTE DISPOSAL
4.29E-09	75	3127	39	0.012	0.52	GO:0032436	BP	2	positive regulation of proteasomal ubiquitin-dependent protein catabolic process	9	waste disposal - ubiquitin-proteasome	WASTE DISPOSAL
0.000000411	91	3127	41	0.013	0.451	GO:2000060	BP	2	positive regulation of protein ubiquitination involved in ubiquitin-dependent protein catabolic process	8	waste disposal - ubiquitin-proteasome	WASTE DISPOSAL
7.39E-13	132	3127	62	0.02	0.47	GO:0031397	BP	2	negative regulation of protein ubiquitination	8	waste disposal - ubiquitin-proteasome	WASTE DISPOSAL
0.00000846	81	3127	36	0.012	0.444	GO:0051444	BP	2	negative regulation of ubiquitin-protein transferase activity	9	waste disposal - ubiquitin-proteasome	WASTE DISPOSAL
0.0069	74	3127	29	0.009	0.392	GO:1904667	BP	2	negative regulation of ubiquitin protein ligase activity	10	waste disposal - ubiquitin-proteasome	WASTE DISPOSAL
0.0000343	81	3127	35	0.011	0.432	GO:0031145	BP	2	anaphase-promoting complex-dependent catabolic process	11	waste disposal - ubiquitin-proteasome - cell cycle	WASTE DISPOSAL
0.0014	73	3127	30	0.01	0.411	GO:0051439	BP	2	regulation of ubiquitin-protein ligase activity involved in mitotic cell cycle	11	waste disposal - ubiquitin-proteasome - cell cycle	WASTE DISPOSAL
0.00156	77	3127	31	0.01	0.403	GO:0051437	BP	2	positive regulation of ubiquitin-protein ligase activity involved in regulation of mitotic cell cycle transition	9	waste disposal - ubiquitin-proteasome - cell cycle	WASTE DISPOSAL
0.00355	72	3127	29	0.009	0.403	GO:0051436	BP	2	negative regulation of ubiquitin-protein ligase activity involved in mitotic cell cycle	11	waste disposal - ubiquitin-proteasome - cell cycle	WASTE DISPOSAL
0.00017	89	3127	36	0.012	0.404	GO:0036503	BP	2	ERAD pathway	6	waste disposal - ubiquitin-proteasome - ER	WASTE DISPOSAL
0.000843	68	3127	29	0.009	0.426	GO:0030433	BP	2	ubiquitin-dependent ERAD pathway	7	waste disposal - ubiquitin-proteasome - ER	WASTE DISPOSAL
0.0115	27	3127	15	0.005	0.556	GO:1904292	BP	2	regulation of ERAD pathway	6	waste disposal - ubiquitin-proteasome - ER	WASTE DISPOSAL
0.0000122	126	3127	48	0.015	0.381	GO:0030968	BP	2	endoplasmic reticulum unfolded protein response	5	waste disposal - ubiquitin-proteasome - ER	WASTE DISPOSAL
0.00716	13	3127	10	0.003	0.769	GO:1904294	BP	2	positive regulation of ERAD pathway	6	waste disposal - ubiquitin-proteasome - ER	WASTE DISPOSAL
0.000255	72	3127	31	0.01	0.431	GO:0031146	BP	2	SCF-dependent proteasomal ubiquitin-dependent protein catabolic process	11	waste disposal - ubiquitin-proteasome - SCF	WASTE DISPOSAL
2.58E-14	186	3127	80	0.026	0.43	GO:0035966	BP	2	response to topologically incorrect protein	4	waste disposal - UPR	WASTE DISPOSAL
5.39E-12	168	3127	71	0.023	0.423	GO:0006986	BP	2	response to unfolded protein	5	waste disposal - UPR	WASTE DISPOSAL
4.89E-09	147	3127	60	0.019	0.408	GO:0035967	BP	2	cellular response to topologically incorrect protein	5	waste disposal - UPR	WASTE DISPOSAL
0.000000492	131	3127	52	0.017	0.397	GO:0034620	BP	2	cellular response to unfolded protein	6	waste disposal - UPR	WASTE DISPOSAL
0.000573	67	3127	29	0.009	0.433	GO:0036498	BP	2	IRE1-mediated unfolded protein response	6	waste disposal - UPR	WASTE DISPOSAL
